# Supplementary material for: Dibenzocyclooctadiene Lignans from Schisandra chinensis with Anti-Inflammatory Effects
Source: MDPI journal article supplement (doi:10.3390/ijms25063465), 2024-03-19
Supplement: s1 [file s1]

# Dibenzocyclooctadiene Lignans from *Schisandra chinensis* with Anti-inflammatory Effects

Michal Rybníkář <sup>1,\*</sup>, Milan Malaník <sup>1</sup>, Karel Šmejkal <sup>1</sup>, Emil Švajdlenka <sup>1</sup>, Polina Shpet <sup>1,2</sup>, Pavel Babica<sup>2</sup>, Stefano Dall'Acqua <sup>3</sup>, Ondřej Smíštek <sup>4</sup>, Ondřej Jurček <sup>1</sup>, and Jakub Treml <sup>4,\*</sup>

## Supplementary data

### List of figures:

Figure S1. <sup>1</sup>H NMR spectrum of compound **1** in CD<sub>3</sub>OD-*d*<sub>4</sub> (at 303 K)  
Figure S2. HSQCDEPT NMR spectrum of compound **1** in CD<sub>3</sub>OD-*d*<sub>4</sub> (at 303 K)  
Figure S3. HMBC NMR spectrum of compound **1** in CD<sub>3</sub>OD-*d*<sub>4</sub>  
Figure S4. Diagnostic HMBC correlations of compound **1** in CD<sub>3</sub>OD-*d*<sub>4</sub>  
Figure S5. COSY NMR spectrum of compound **1** in CD<sub>3</sub>OD-*d*<sub>4</sub>  
Figure S6. NOESY NMR spectrum of compound **1** in CD<sub>3</sub>OD-*d*<sub>4</sub>  
Figure S7. HPLC-ELSD chromatogram of compound **1**  
Figure S8. UV spectrum of compound **1**  
Figure S9. LC-MS and HRMS spectrum of compound **1**  
Figure S10. <sup>1</sup>H NMR spectrum of compound **2** in CDCl<sub>3</sub>-*d*  
Figure S11. HMBC NMR spectrum of compound **2** in CDCl<sub>3</sub>-*d*  
Figure S12. HQSC NMR spectrum of compound **2** in CDCl<sub>3</sub>-*d*  
Figure S13. COSY NMR spectrum of compound **2** in CDCl<sub>3</sub>-*d*  
Figure S14. NOESY NMR spectrum of compound **2** in CDCl<sub>3</sub>-*d*  
Figure S15. HPLC-DAD chromatogram of compound **2**  
Figure S16. LR-MS spectrum of compound **2**  
Figure S17. CD spectrum of compound **2**  
Figure S18. IR spectrum of compound **2**  
Figure S19. <sup>1</sup>H NMR spectrum of compound **3** in CDCl<sub>3</sub>-*d*  
Figure S20. HMBC NMR spectrum of compound **3** in CDCl<sub>3</sub>-*d*  
Figure S21. HSQC NMR spectrum of compound **3** in CDCl<sub>3</sub>-*d*  
Figure S22. COSY NMR spectrum of compound **3** in CDCl<sub>3</sub>-*d*  
Figure S23. NOESY NMR spectrum of compound **3** in CDCl<sub>3</sub>-*d*  
Figure S24. HPLC-DAD chromatogram of compound **3**  
Figure S25. LR-MS spectrum of compound **3**  
Figure S26. CD spectrum of compound **3**  
Figure S27. IR spectrum of compound **3**  
Figure S28. <sup>1</sup>H NMR spectrum of compound **4** in CD<sub>3</sub>OD-*d*<sub>4</sub>  
Figure S29. HMBC NMR spectrum of compound **4** in CD<sub>3</sub>OD-*d*<sub>4</sub>  
Figure S30. HSQC NMR spectrum of compound **4** in CD<sub>3</sub>OD-*d*<sub>4</sub>  
Figure S31. COSY NMR spectrum of compound **4** in CD<sub>3</sub>OD-*d*<sub>4</sub>  
Figure S32. NOESY NMR spectrum of compound **4** in CD<sub>3</sub>OD-*d*<sub>4</sub>  
Figure S33. HPLC-DAD chromatogram of compound **4**  
Figure S34. LR-MS chromatogram of compound **4**  
Figure S35. CD spectrum of compound **4**  
Figure S36. IR spectrum of compound **4**  
Figure S37. <sup>1</sup>H NMR spectrum of compound **5** in CD<sub>3</sub>OD-*d*<sub>4</sub>  
Figure S38. HMBC NMR spectrum of compound **5** in CD<sub>3</sub>OD-*d*<sub>4</sub>  
Figure S39. HSQC NMR spectrum of compound **5** in CD<sub>3</sub>OD-*d*<sub>4</sub>  
Figure S40. COSY NMR spectrum of compound **5** in CD<sub>3</sub>OD-*d*<sub>4</sub>  
Figure S41. NOESY NMR spectrum of compound **5** in CD<sub>3</sub>OD-*d*<sub>4</sub>  
Figure S42. HPLC-DAD chromatogram of compound **5**  
Figure S43. LR-MS spectrum of compound **5**  
Figure S44. CD spectrum of compound **5**  
Figure S45. IR spectrum of compound **5**

Figure S46. HPLC-DAD chromatogram of common injection of compound **6** with standard of (+)-deoxyschisandrin; UV spectrum of peak corresponding to (+)-deoxyschisandrin.

Figure S47. HPLC-DAD chromatogram of common injection of (-)-wuweizisu C with standard of (-)-wuweizisu C; UV spectrum of peak corresponding to (-)-wuweizisu C.

Figure S48. <sup>1</sup>H NMR spectrum of epigomisin O in CDCl<sub>3</sub>-*d*

Figure S49. HMBC NMR spectrum of epigomisin O in CDCl<sub>3</sub>-*d*

Figure S50. HSQC NMR spectrum of epigomisin O in CDCl<sub>3</sub>-*d*

Figure S51. COSY NMR spectrum of epigomisin O in CDCl<sub>3</sub>-*d*

Figure S52. NOESY NMR spectrum of epigomisin O in CDCl<sub>3</sub>-*d*

Figure S53. HPLC-DAD chromatogram of epigomisin O

Figure S54. LR-MS spectrum of epigomisin O

Figure S55. CD spectrum of epigomisin O

Figure S56. IR spectrum of epigomisin O

Figure S57. <sup>1</sup>H NMR spectrum of arisantetralone C in CDCl<sub>3</sub>-*d*

Figure S58. HMBC NMR spectrum of arisantetralone C in CDCl<sub>3</sub>-*d*

Figure S59. HSQC NMR spectrum of arisantetralone C in CDCl<sub>3</sub>-*d*

Figure S60. COSY NMR spectrum of arisantetralone C in CDCl<sub>3</sub>-*d*

Figure S62. NOESY NMR spectrum of arisantetralone C in CDCl<sub>3</sub>-*d*

Figure S63. HPLC-DAD chromatogram of arisantetralone C

Figure S64. LR-MS spectrum of arisantetralone C

Figure S65. CD spectrum of arisantetralone C

Figure S66. IR spectrum of arisantetralone C

Figure S67. <sup>1</sup>H NMR spectrum of arisantetralone A in DMSO-*d*<sub>6</sub>

Figure S68. HMBC NMR spectrum of arisantetralone A in DMSO-*d*<sub>6</sub>

Figure S69. HSQC NMR spectrum of arisantetralone A in DMSO-*d*<sub>6</sub>

Figure S70. COSY NMR spectrum of arisantetralone A in DMSO-*d*<sub>6</sub>

Figure S71. NOESY NMR spectrum of arisantetralone A in DMSO-*d*<sub>6</sub>

Figure S72. HPLC-DAD chromatogram of arisantetralone A

Figure S73. LR-MS spectrum of arisantetralone A

Figure S74. CD spectrum of arisantetralone A

Figure S75. IR spectrum of arisantetralone A

Figure S76. <sup>1</sup>H NMR spectrum of (-)-schisantherin E in DMSO-*d*<sub>6</sub>

Figure S77. HMBC NMR spectrum of (-)-schisantherin E in DMSO-*d*<sub>6</sub>

Figure S78. HSQC NMR spectrum of (-)-schisantherin E in DMSO-*d*<sub>6</sub>

Figure S79. COSY NMR spectrum of (-)-schisantherin E in DMSO-*d*<sub>6</sub>

Figure S80. HPLC-DAD chromatogram of (-)-schisantherin E

Figure S81. LR-MS spectrum of (-)-schisantherin E

Figure S82. CD spectrum of (-)-schisantherin E

Figure S83. IR spectrum of (-)-schisantherin E

Figure S84. Schema of isolation and total yields of compounds **2–6**, (-)-wuweizisu C, arisantetralone A, arisantetralone C, epigomisin O, and (-)-schisantherin E

Figure S85. Schema of isolation and yield of compound **1**

Figure S86. Antiproliferative activity of lignans **2–14**

Table S1. Chromatographic conditions of separation of compounds **2**, **6** and arisantetralone C from fraction SC 122-123

Table S2. Chromatographic conditions of separation of compounds **3**, **4**, **5** and **6** from fraction SC 130

Table S3. Chromatographic conditions of purification of compound **3** from fraction SC 130

Table S4. Chromatographic conditions of the first purification of compounds **4** and **5** from fraction SC 130

Table S5. Chromatographic conditions of the second purification of compounds **4** and **5** from fraction SC 130

Table S6. Chromatographic conditions of separation of compound **6** and (-)-wuweizisu C from fraction SC 120-121

Table S7. Chromatographic conditions of separation of epigomisin O from fraction SC 138-148

Table S8. Chromatographic conditions of separation of arisantetralone A from fraction SC 149-167

Table S9. Chromatographic conditions of separation of (-)-schisantherin E from fraction SC 175-181

Table S10. Chromatographic conditions of separation of compounds **3**, **4**, **5** and **6** from fraction SC 126-129

Table S11. Chromatographic conditions of purification of compounds **4** and **5** from fraction SC 126-129

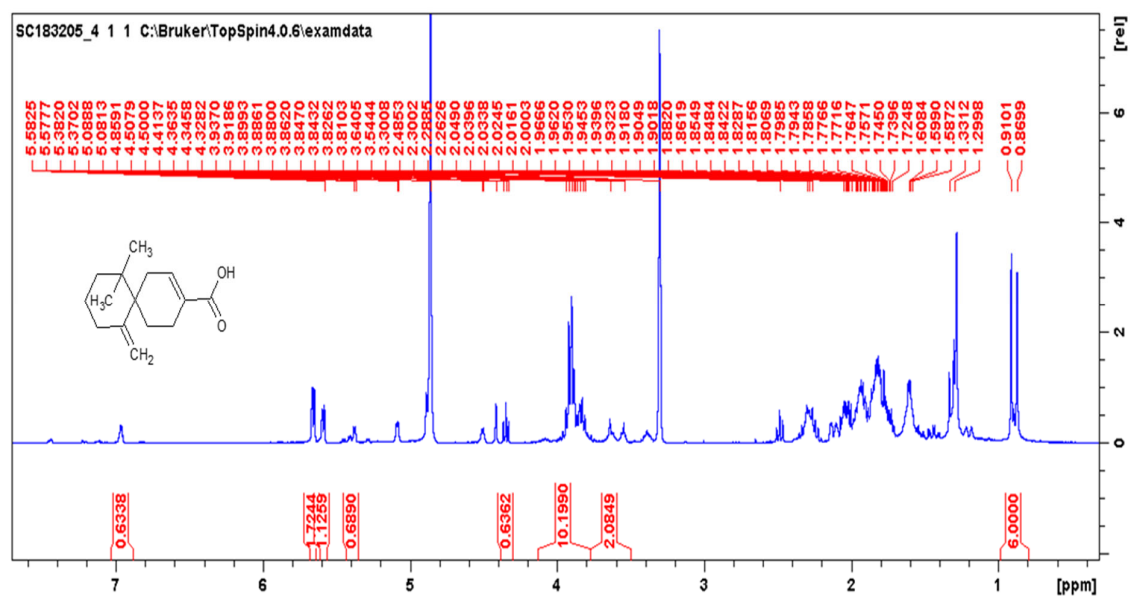

Figure S1.  $^1\text{H}$  NMR spectrum of compound **1** in  $\text{CD}_3\text{OD}$  (at 303 K)

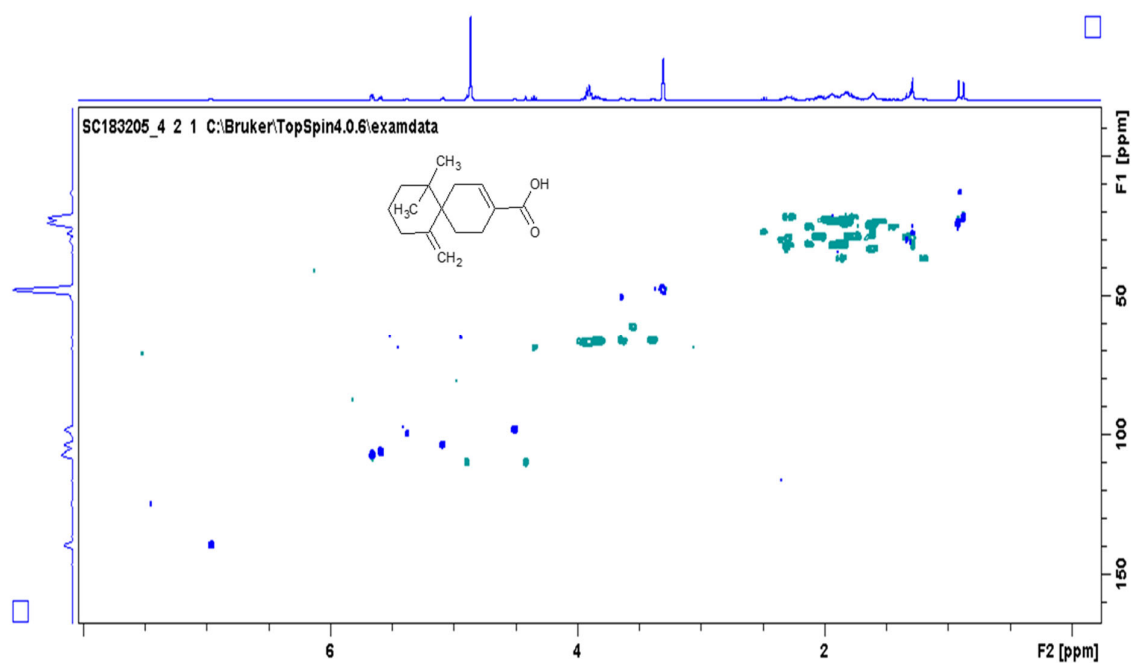

Figure S2. HSQCDEPT NMR spectrum of compound **1** in  $\text{CD}_3\text{OD}$  (at 303 K)

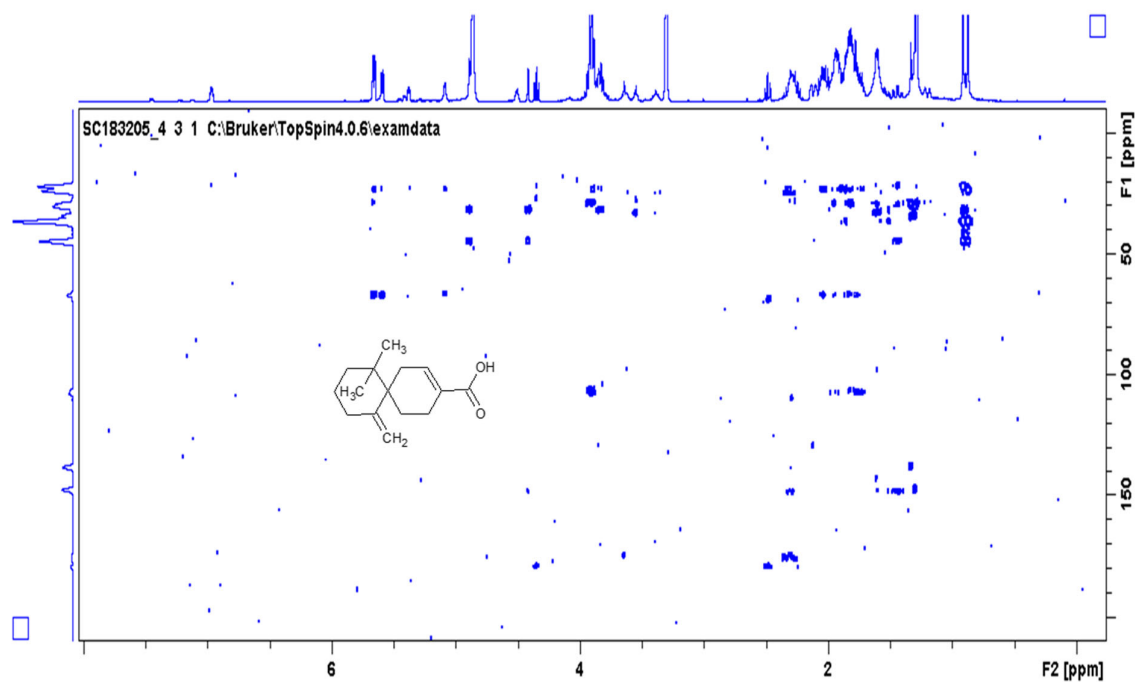

Figure S3. HMBC NMR spectrum of compound **1** in CD<sub>3</sub>OD

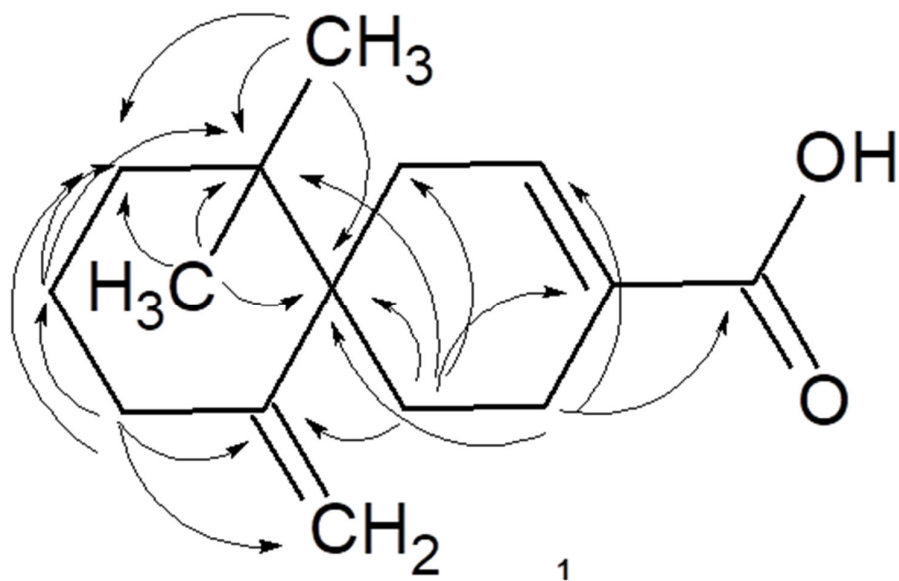

Figure S4. Diagnostic HMBC correlations of compound **1** in CD<sub>3</sub>OD



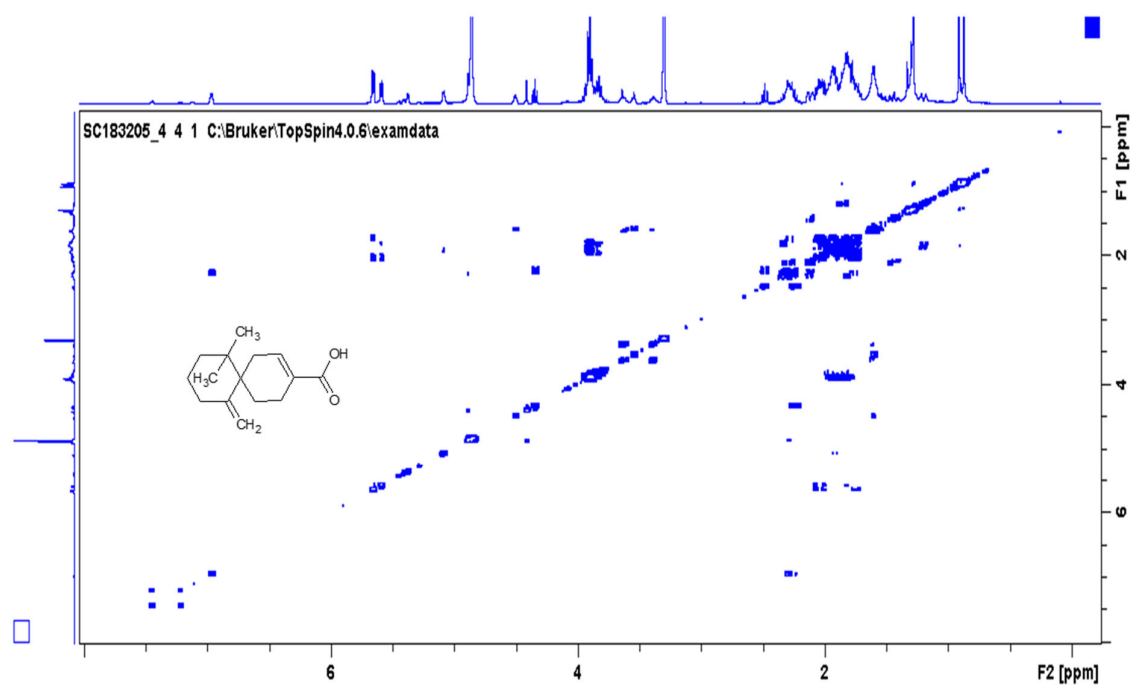

Figure S5. COSY NMR spectrum of compound 1 in CD<sub>3</sub>OD

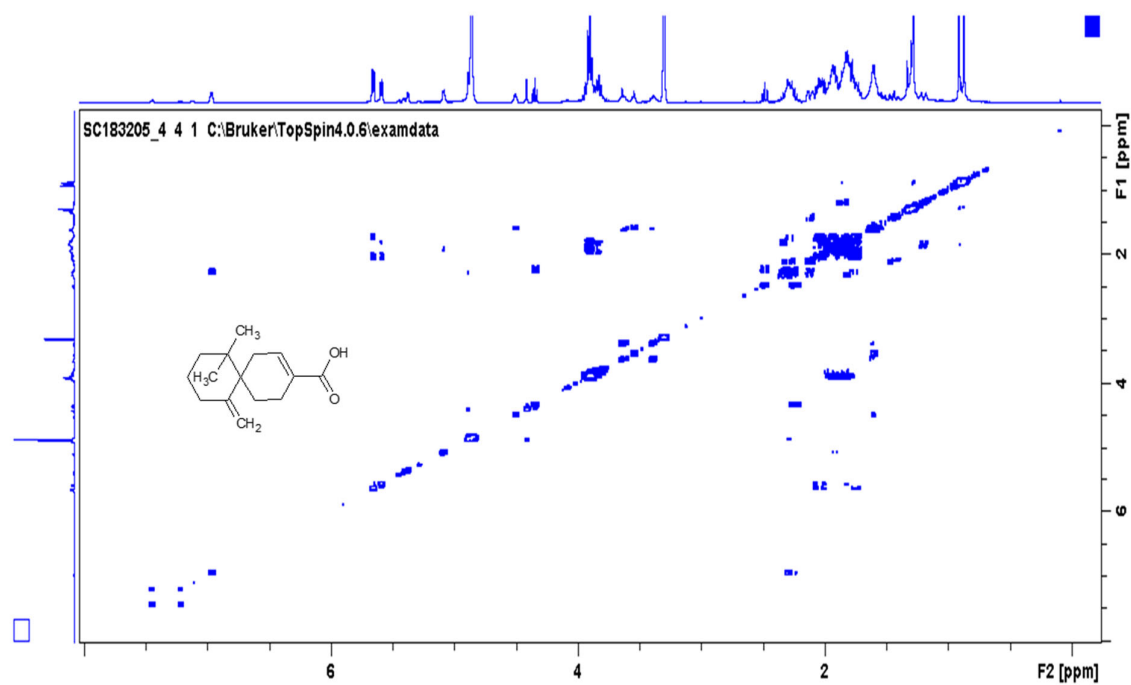

Figure S6. NOESY NMR spectrum of compound 1 in CD<sub>3</sub>OD

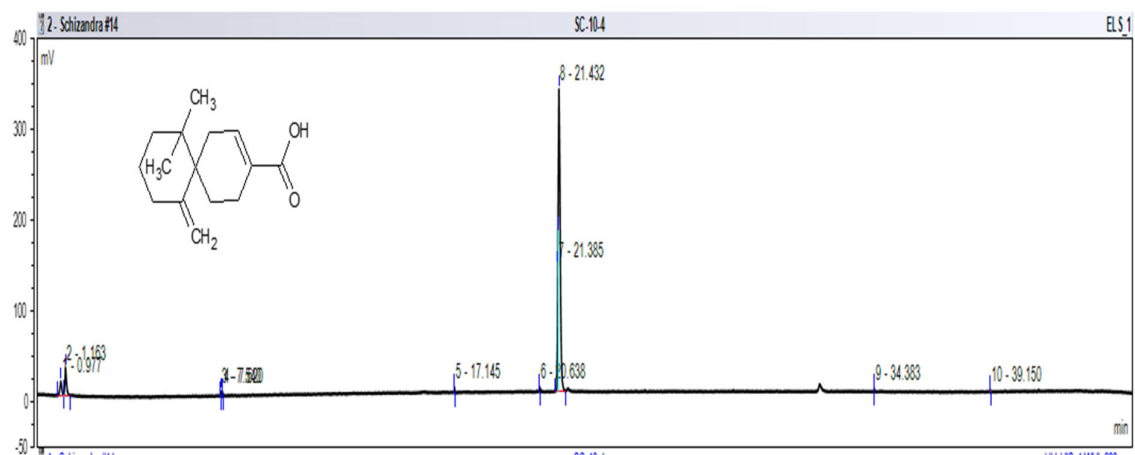

Figure S7. HPLC-ELSD chromatogram of compound 1

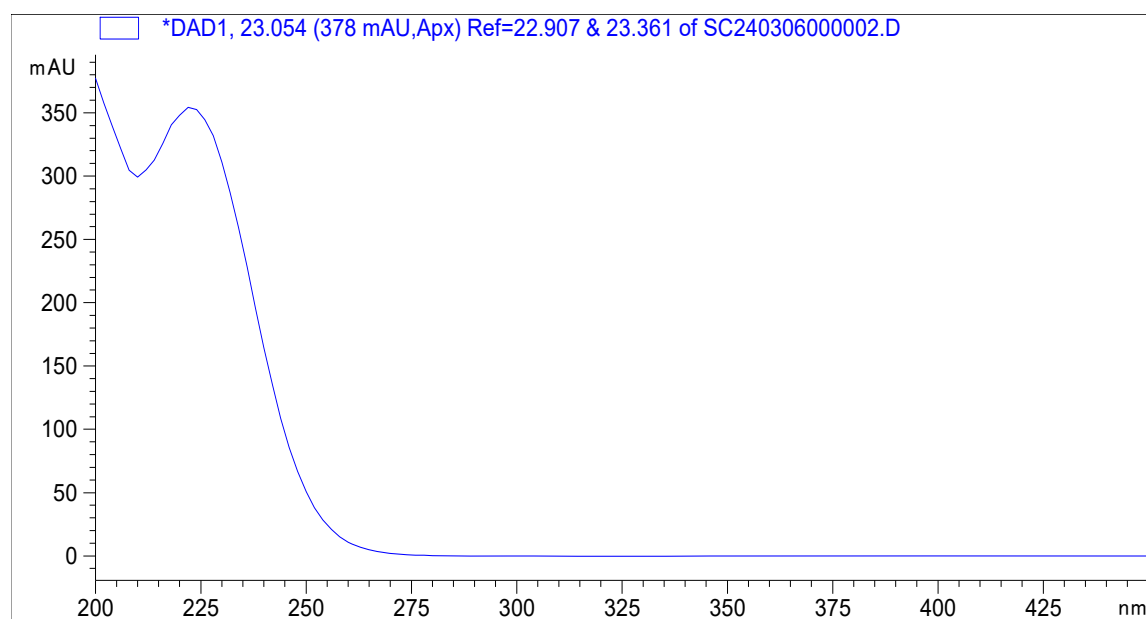

Figure S8. UV spectrum of compound 1

Expected Compounds per File  
05-Mar-2024 1:21

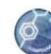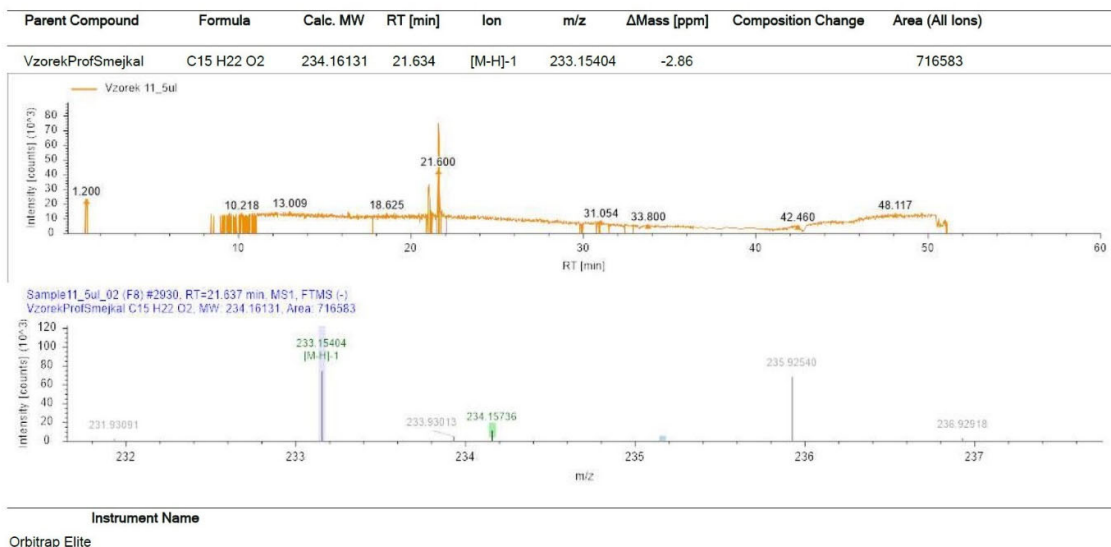

© Reported with Compound Discoverer 3.3

Figure S9. LC-MS and HRMS spectrum of compound 1

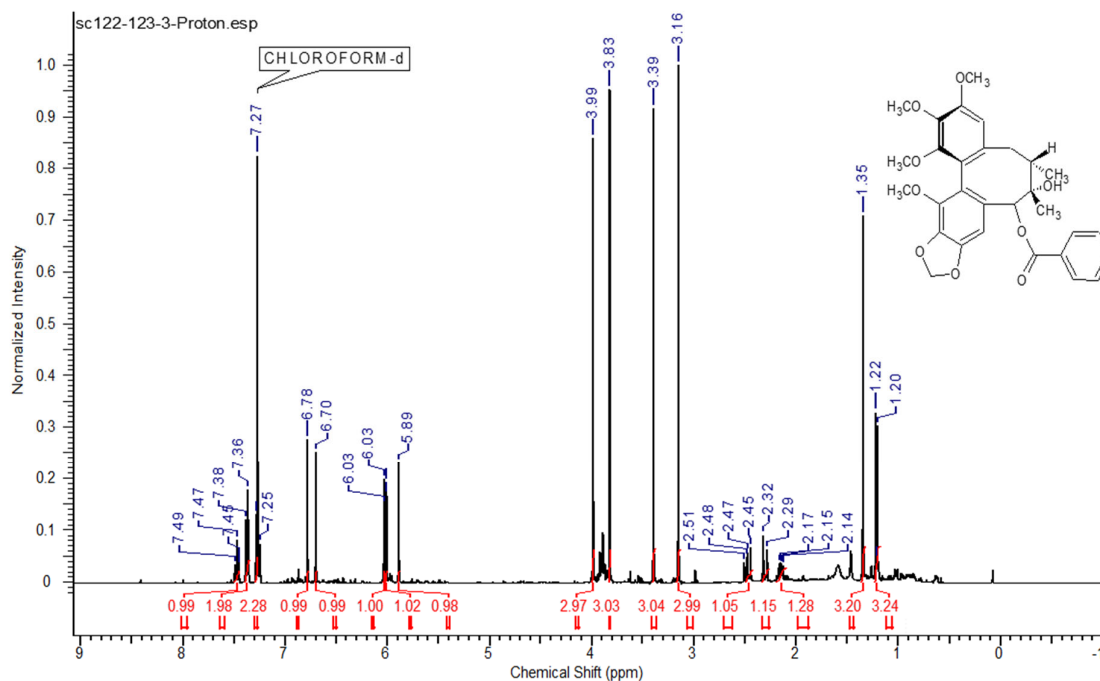

Figure S10. <sup>1</sup>H NMR spectrum of compound 2 in CDCl<sub>3</sub>

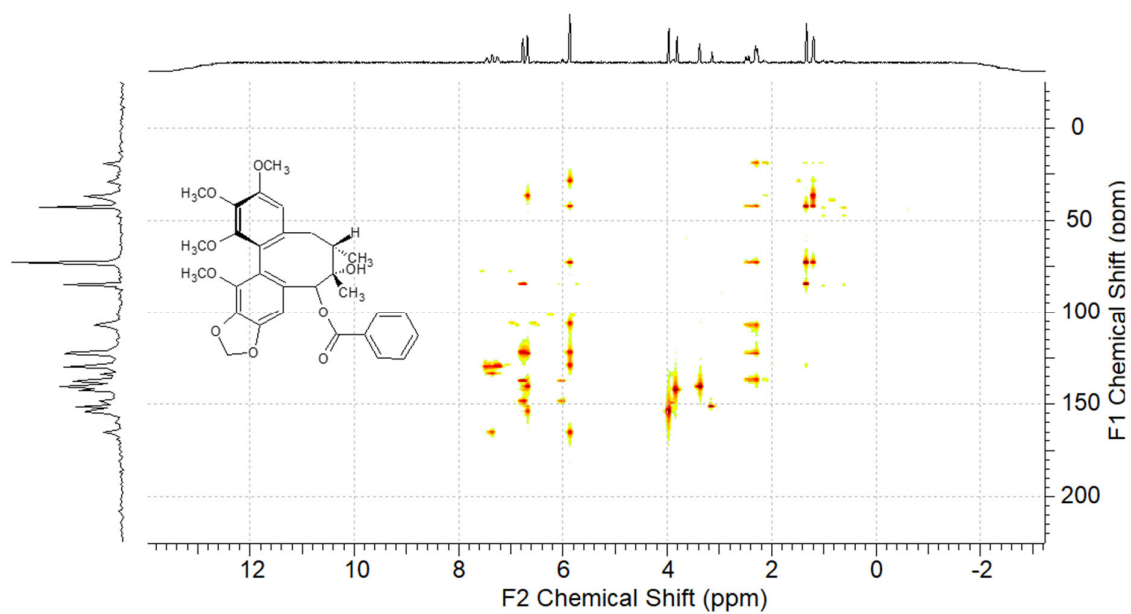

Figure S11. HMBC NMR spectrum of compound 2 in CDCl<sub>3</sub>

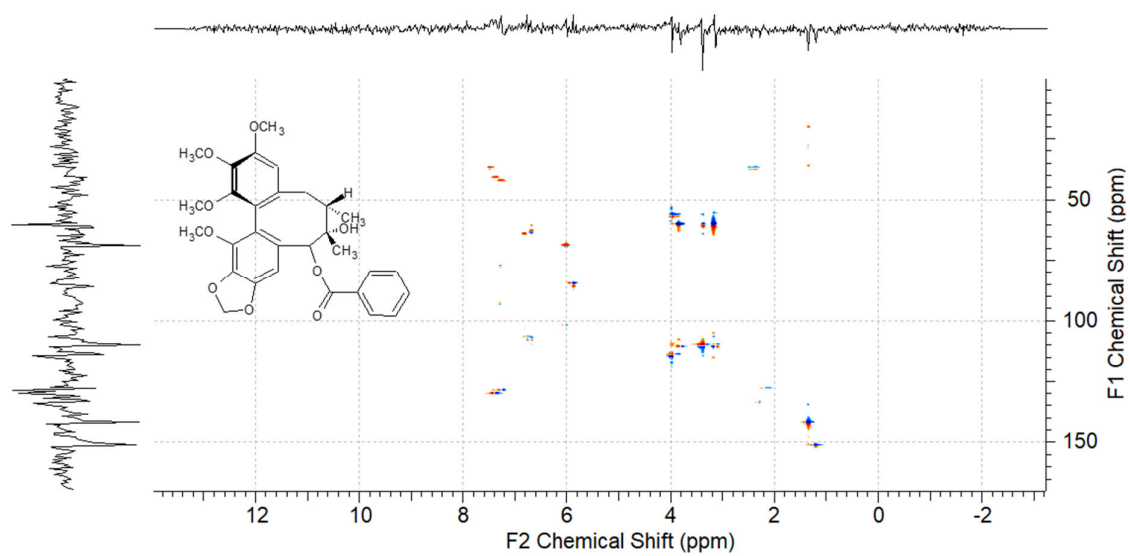

Figure S12. HQC NMR spectrum of compound 2 in CDCl<sub>3</sub>

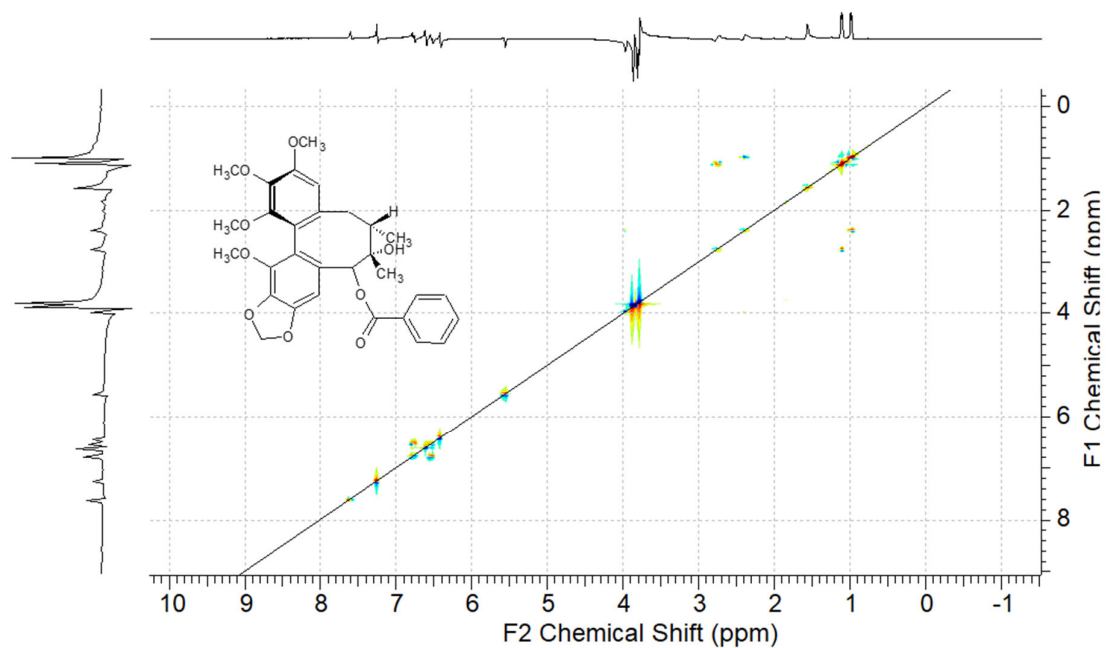

Figure S13. COSY NMR spectrum of compound **2** in  $\text{CDCl}_3$

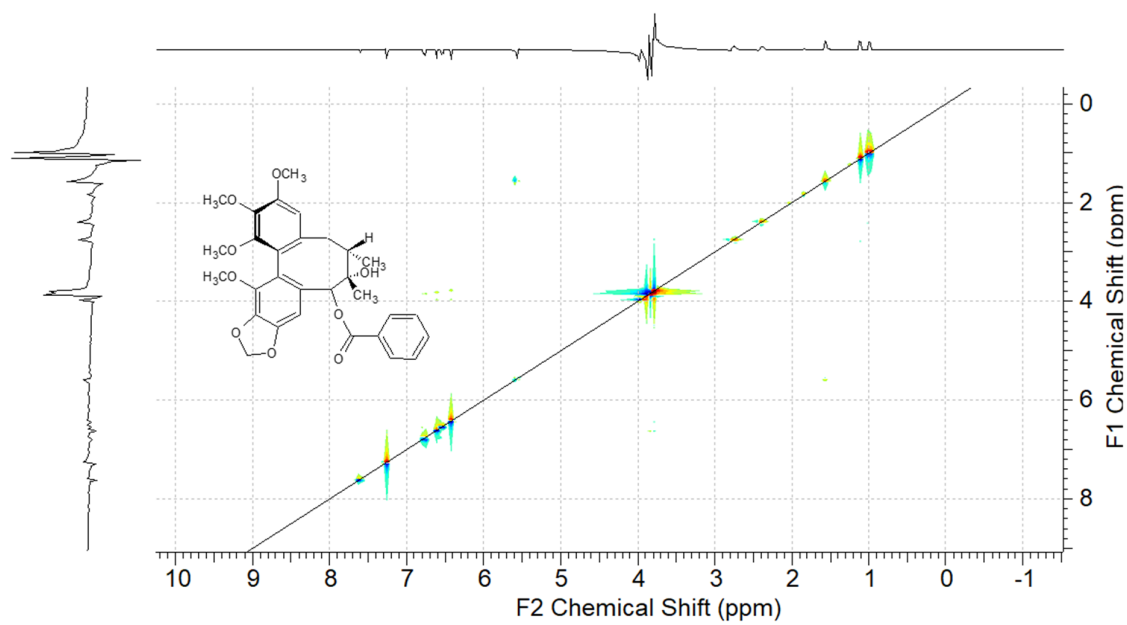

Figure S14. NOESY NMR spectrum of compound **2** in  $\text{CDCl}_3$

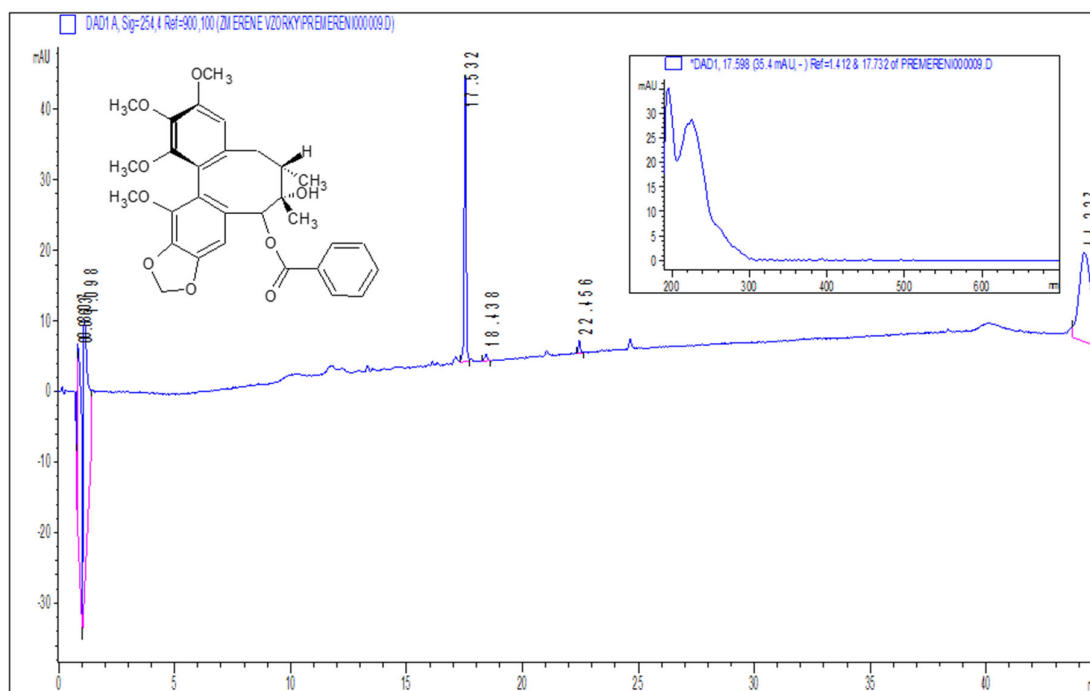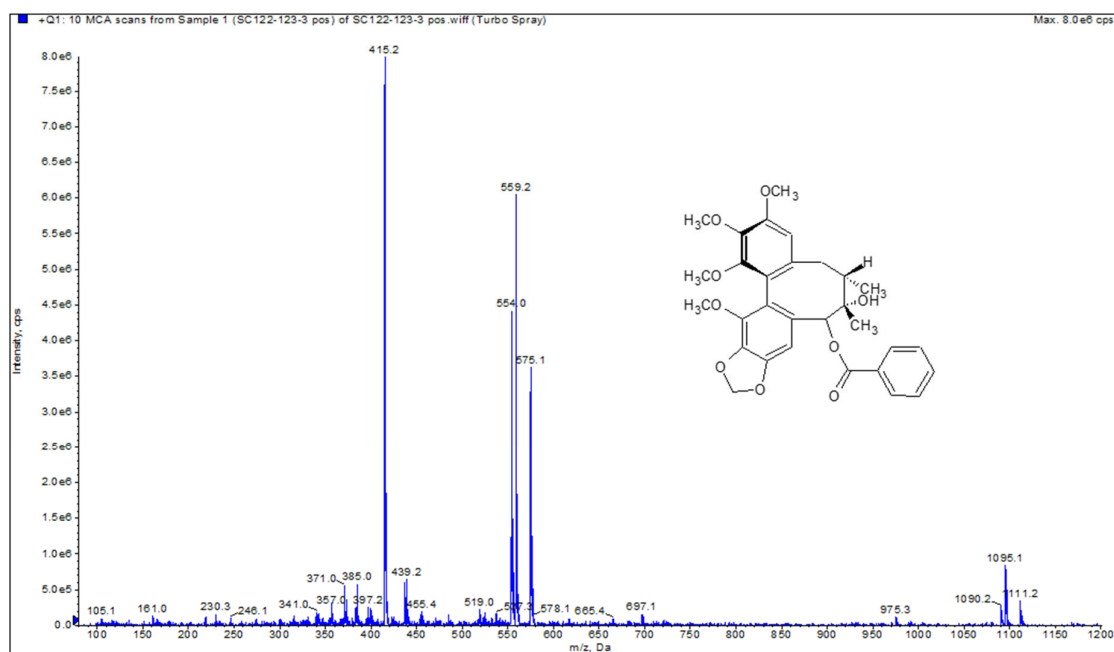

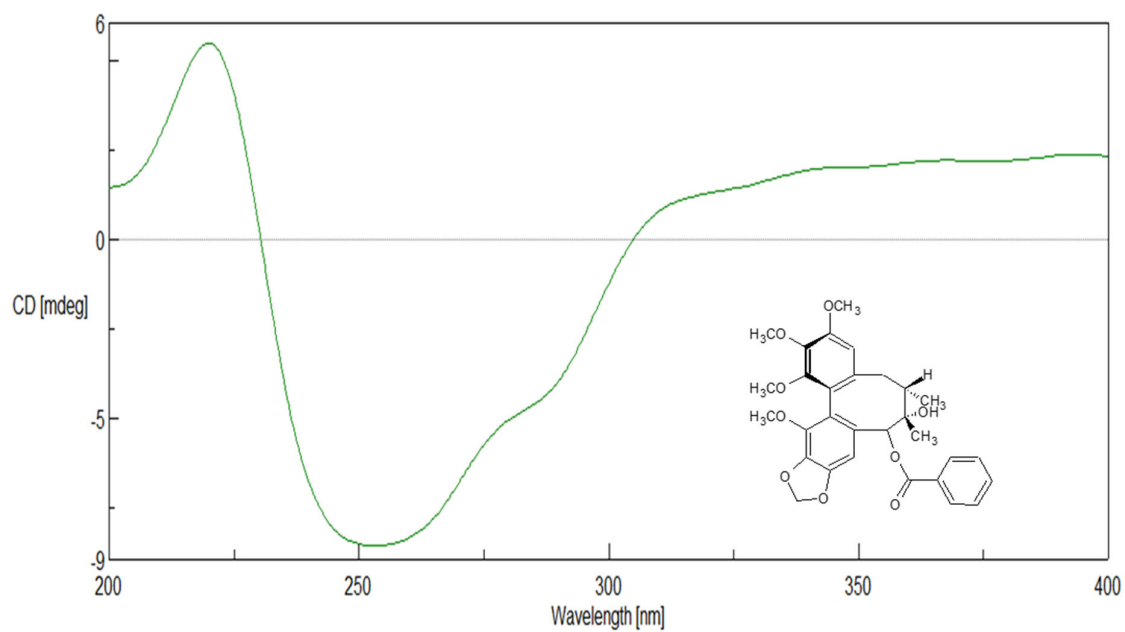

Figure S17. CD spectrum of compound 2 in methanol ( $c = 1 \text{ mg/mL}$ )

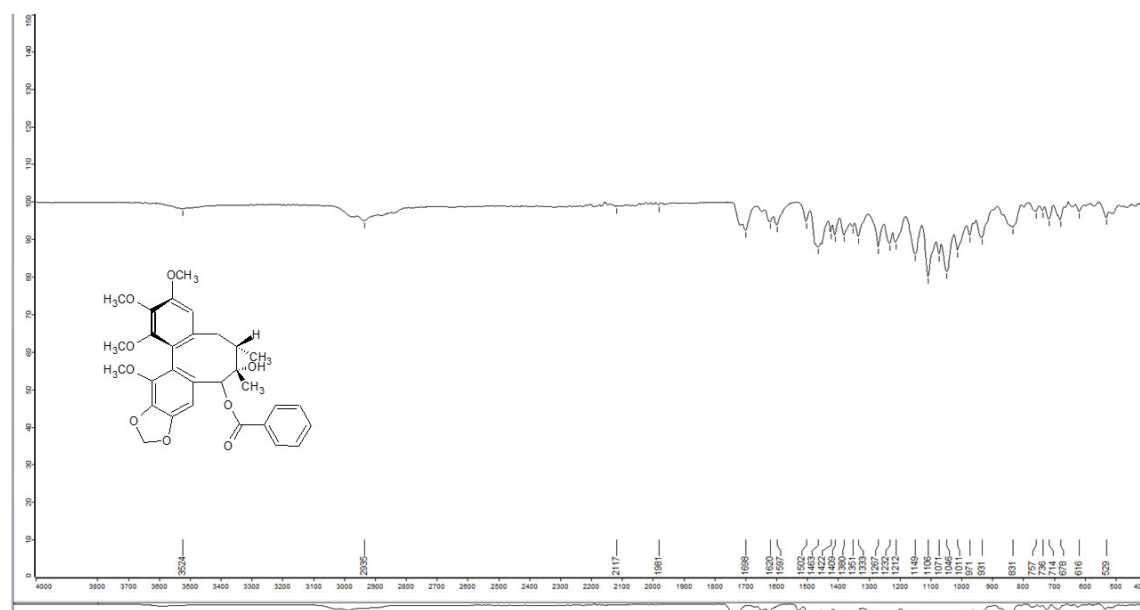

Figure S18. IR spectrum of compound 2

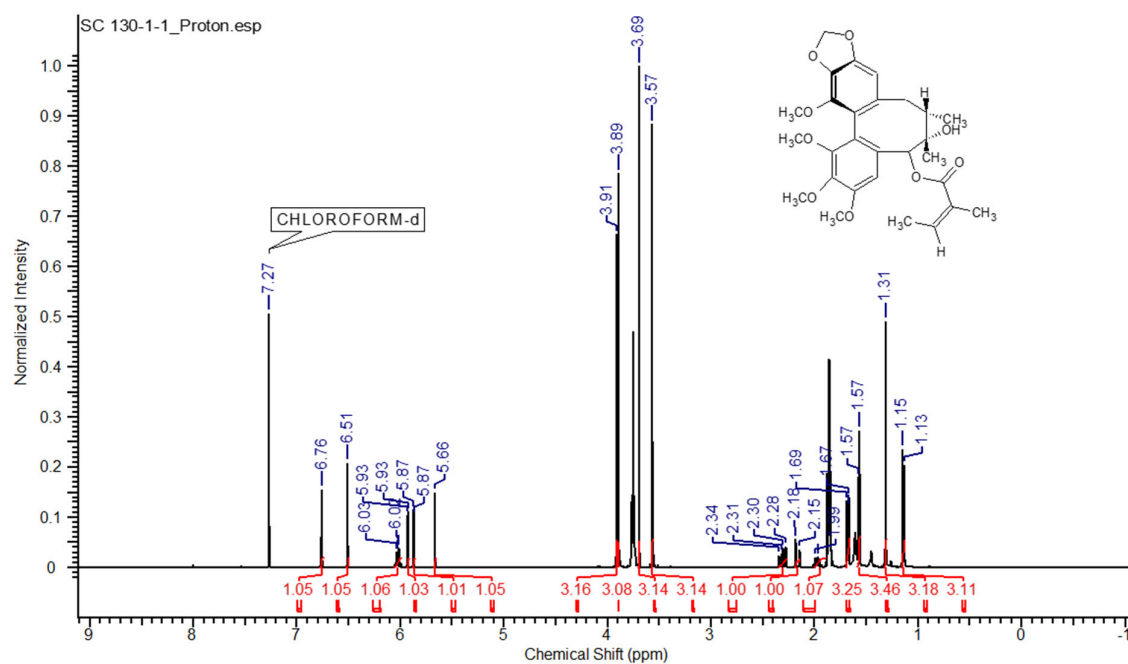

Figure S19.  $^1\text{H}$  NMR spectrum of compound 3 in  $\text{CDCl}_3$

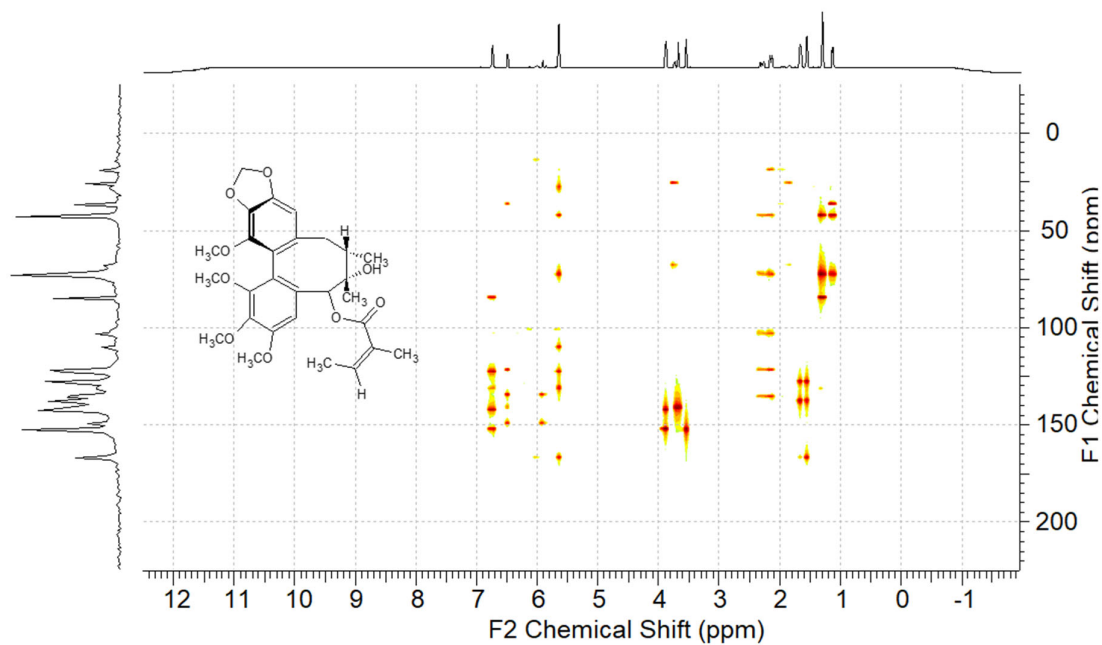

Figure S20. HMBC NMR spectrum of compound 3 in  $\text{CDCl}_3$



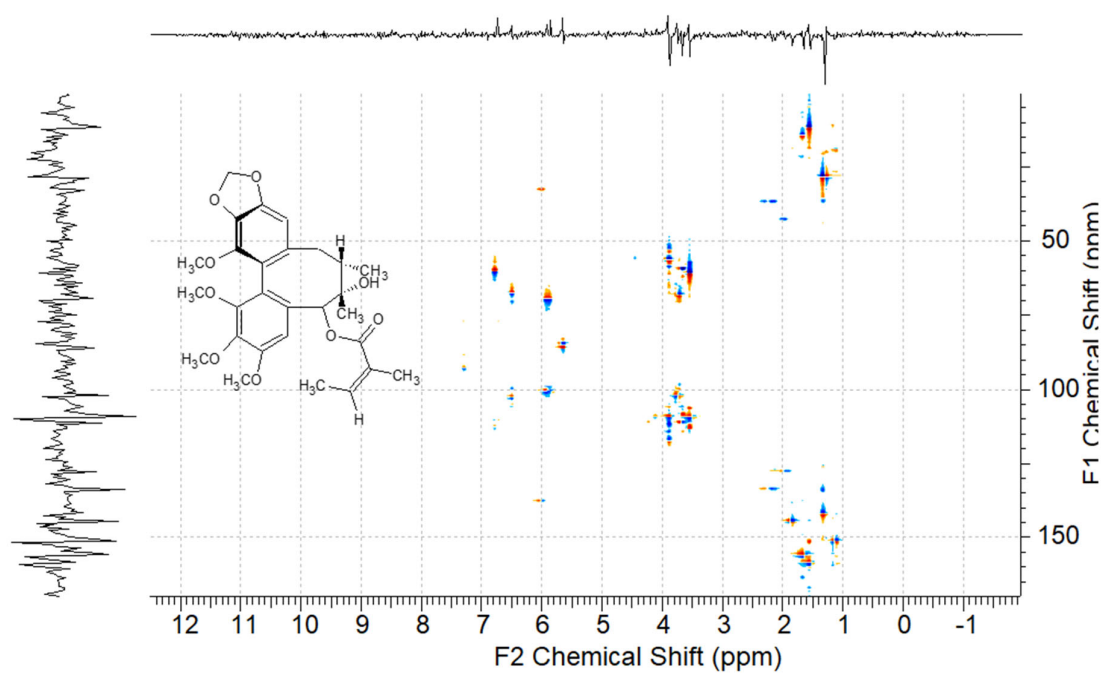

Figure S21. HSQC NMR spectrum of compound 3 in CDCl<sub>3</sub>

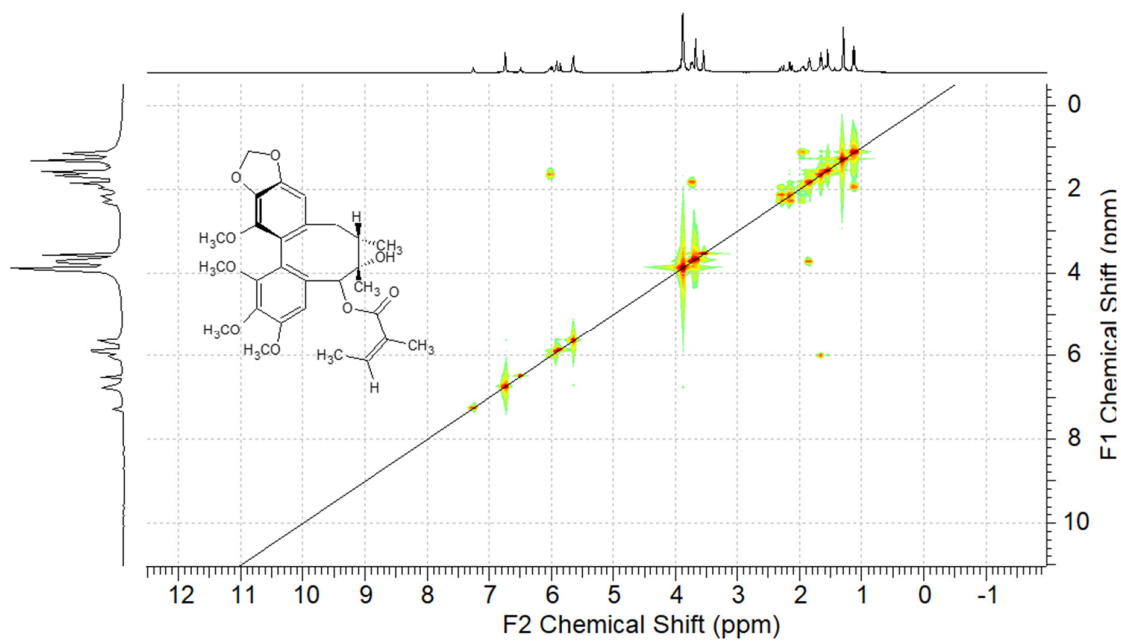

Figure S22. COSY NMR spectrum of compound 3 in CDCl<sub>3</sub>

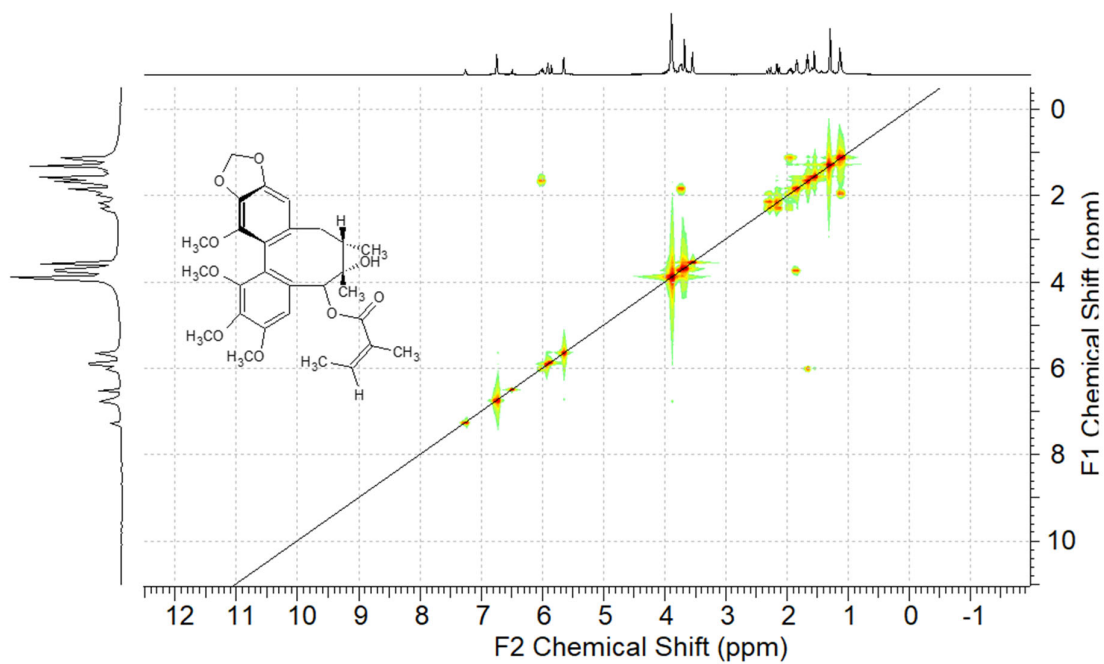

Figure S23. NOESY NMR spectrum of compound 3 in CDCl<sub>3</sub>

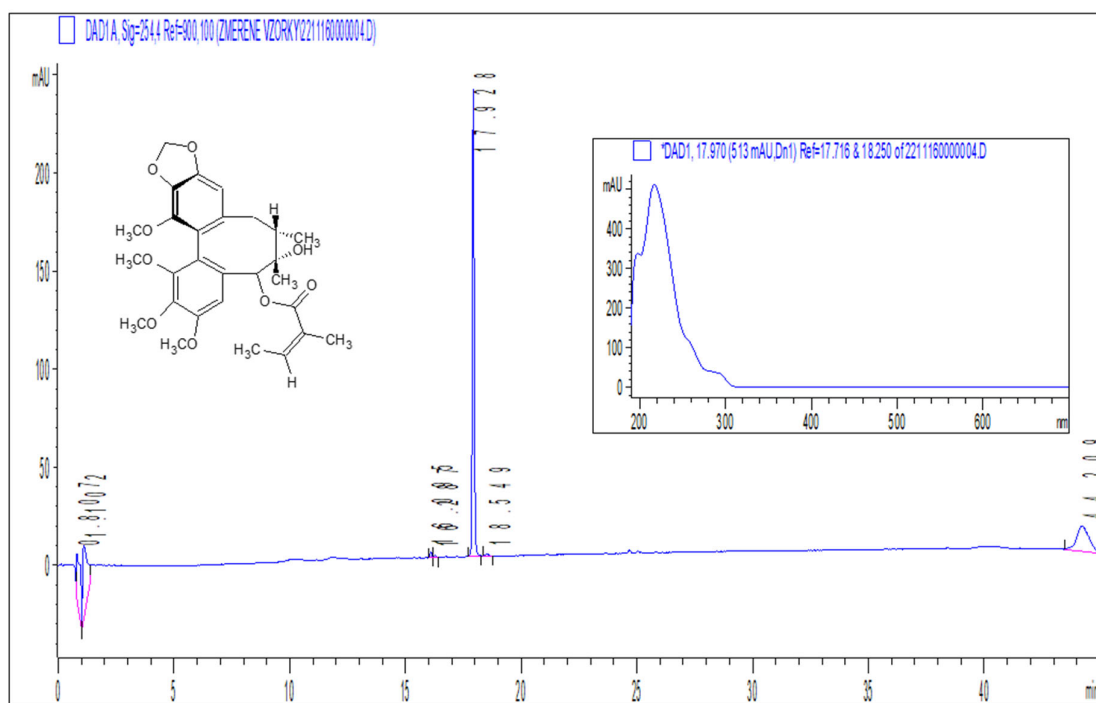

Figure S24. HPLC-DAD chromatogram of compound 3

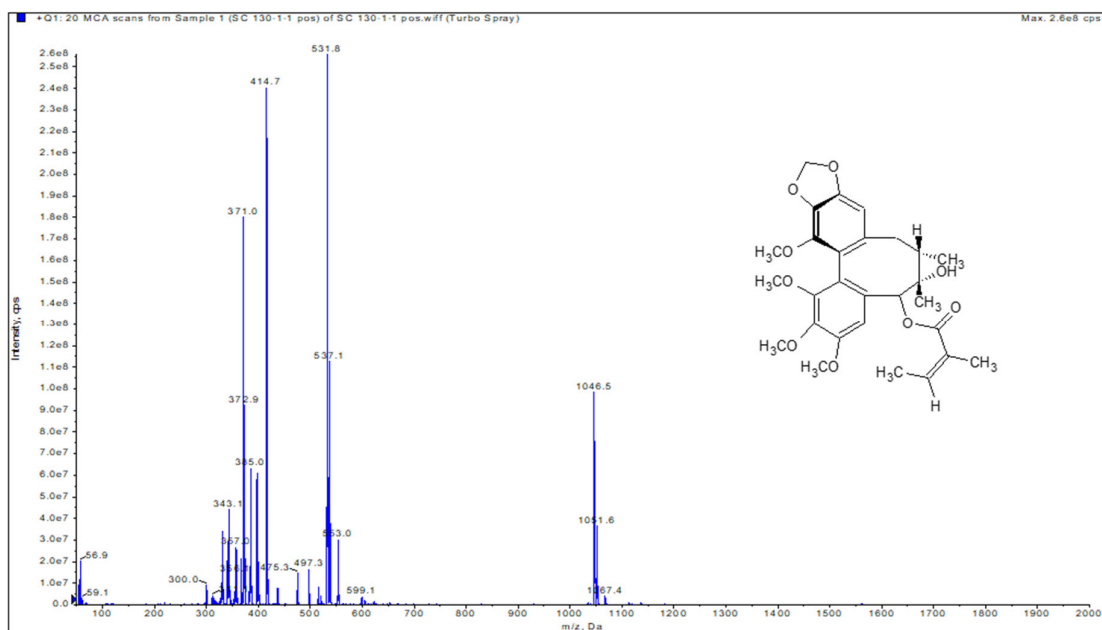

Figure S25. LR-MS spectrum of compound 3

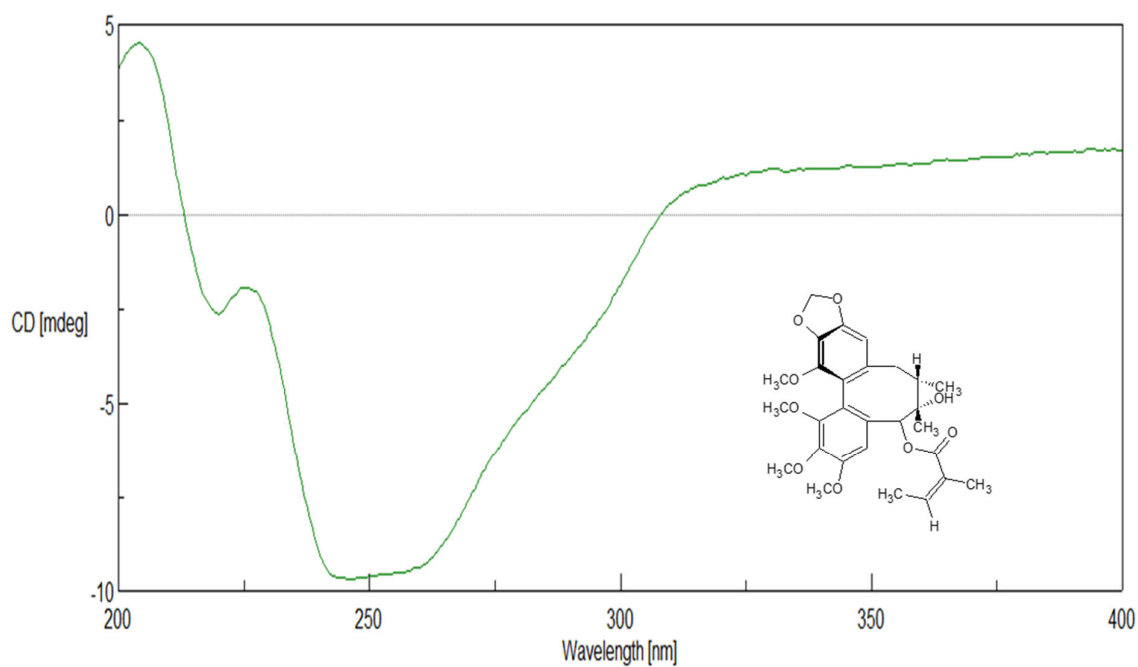

Figure S26. CD spectrum of compound 3 in methanol (c=1 mg/mL)

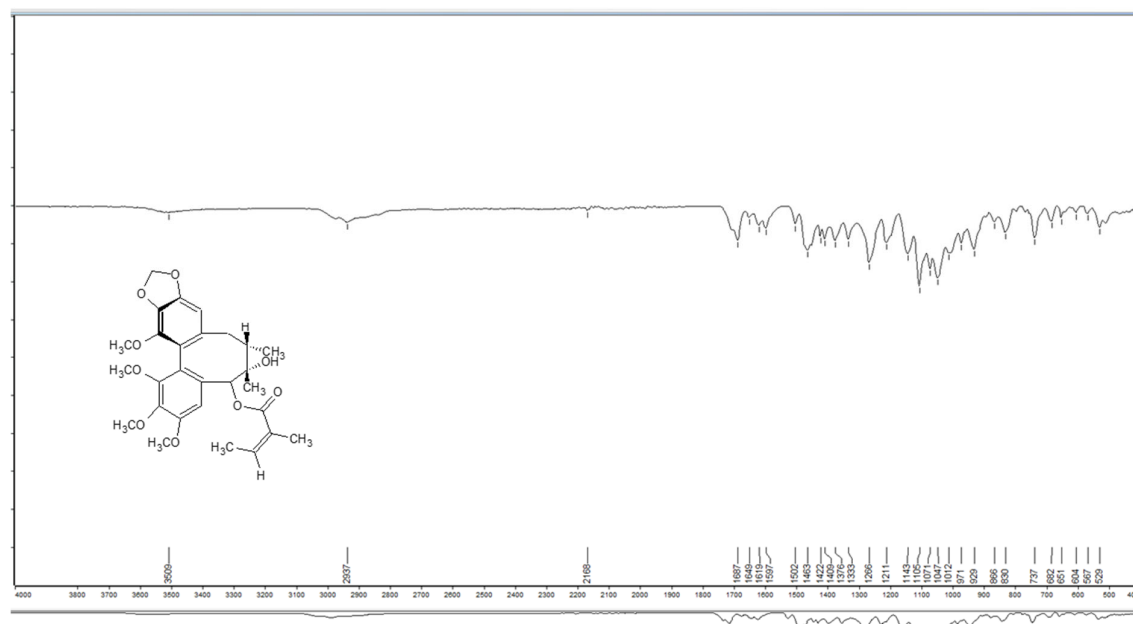

Figure S27. IR spectrum of compound **3**

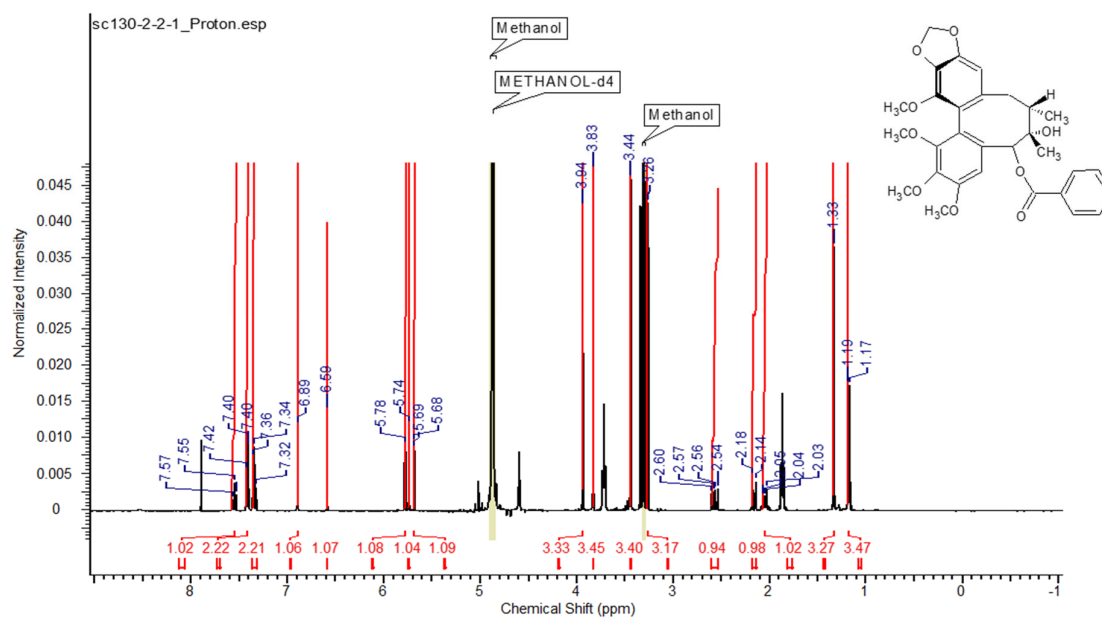

Figure S28.  $^1\text{H}$  NMR spectrum of compound **4** in  $\text{CD}_3\text{OD}$

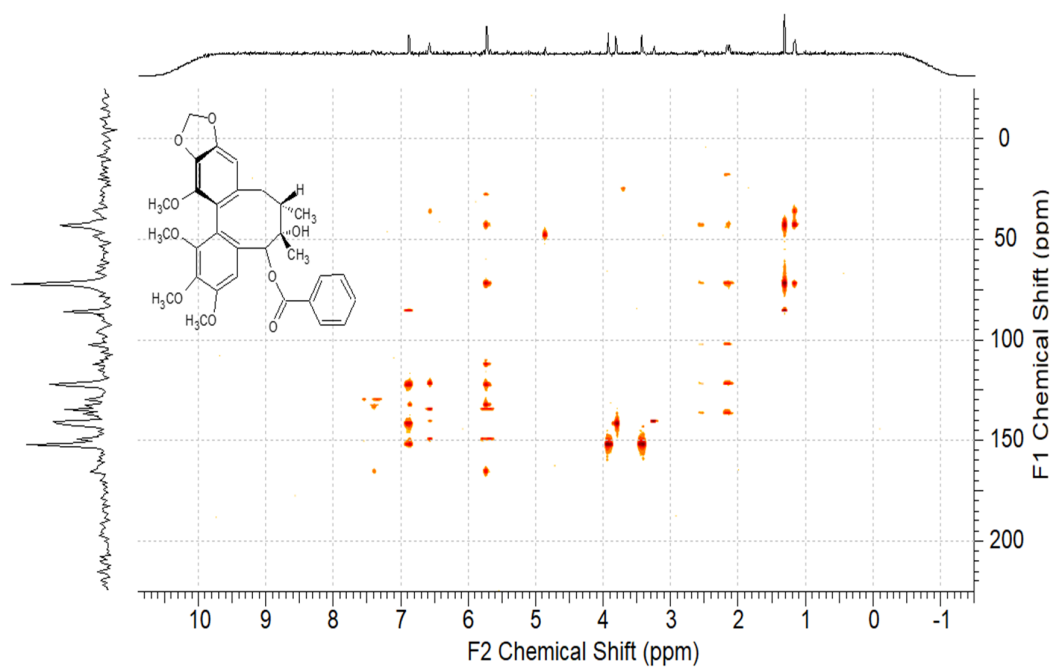

Figure S29. HMBC NMR spectrum of compound **4** in CD<sub>3</sub>OD

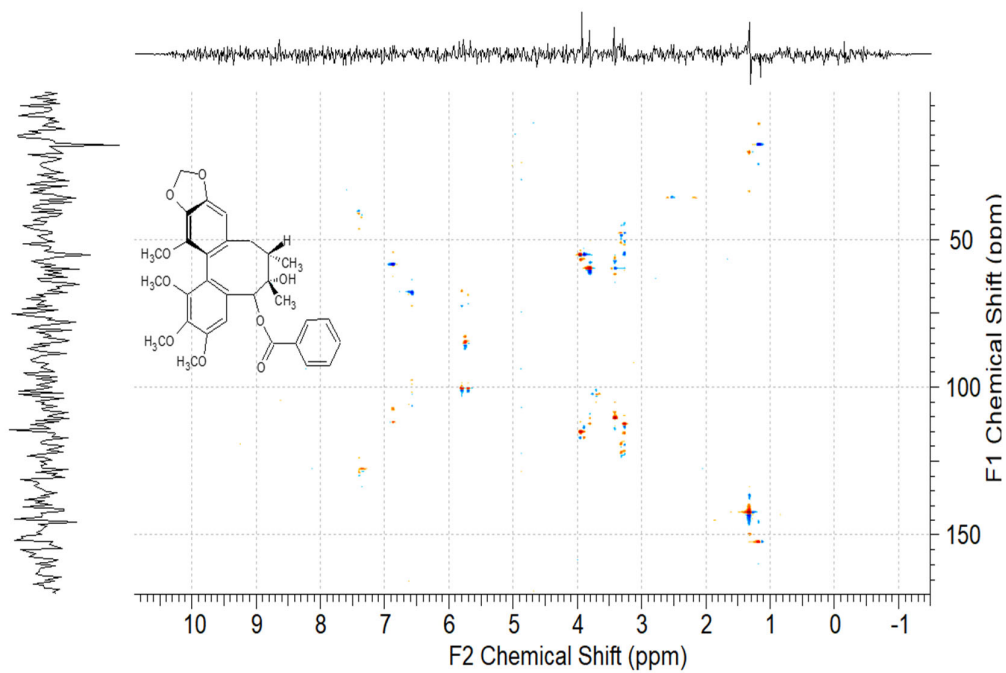

Figure S30. HSQC NMR spectrum of compound **4** in CD<sub>3</sub>OD

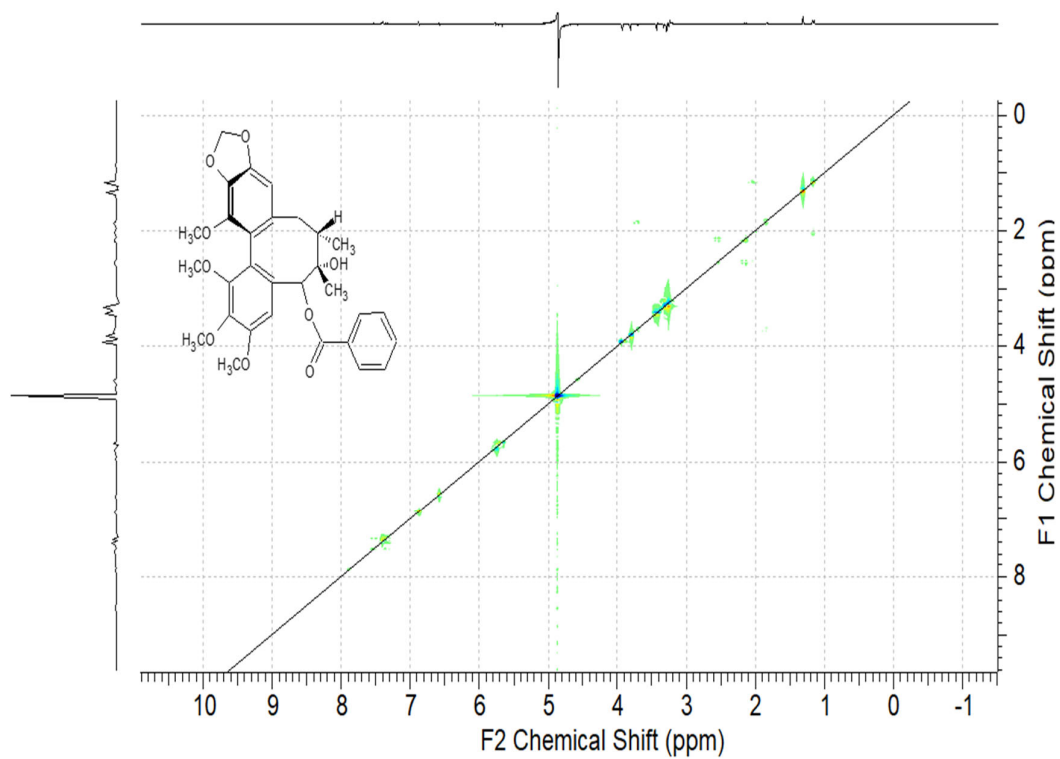

Figure S31. COSY NMR spectrum of compound **4** in CD<sub>3</sub>OD

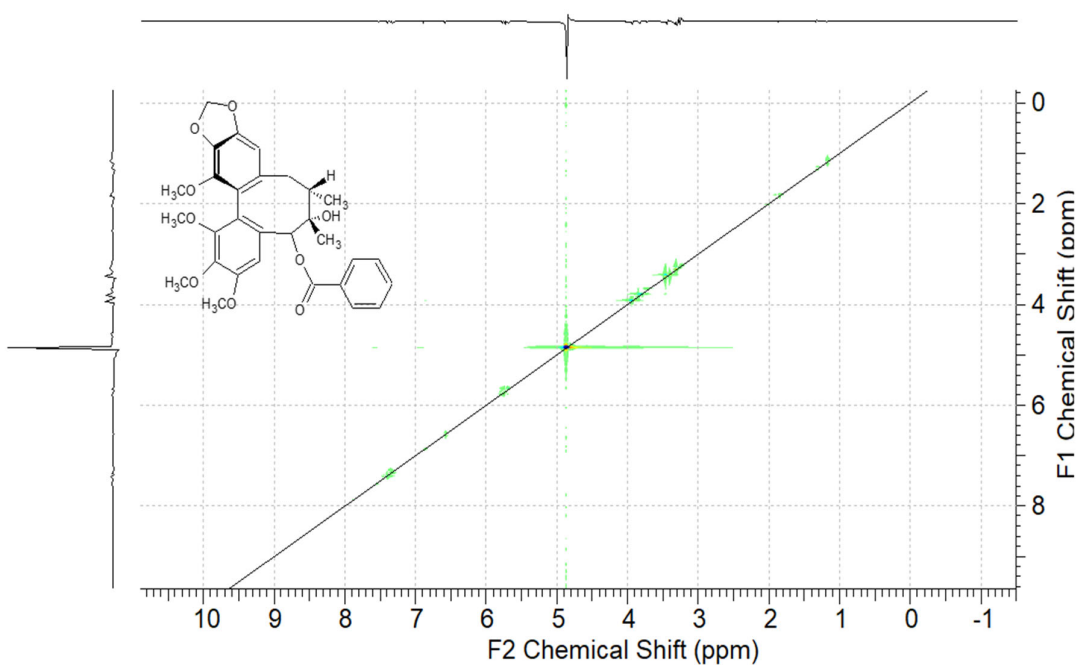

Figure S32. NOESY NMR spectrum of compound **4** in CD<sub>3</sub>OD

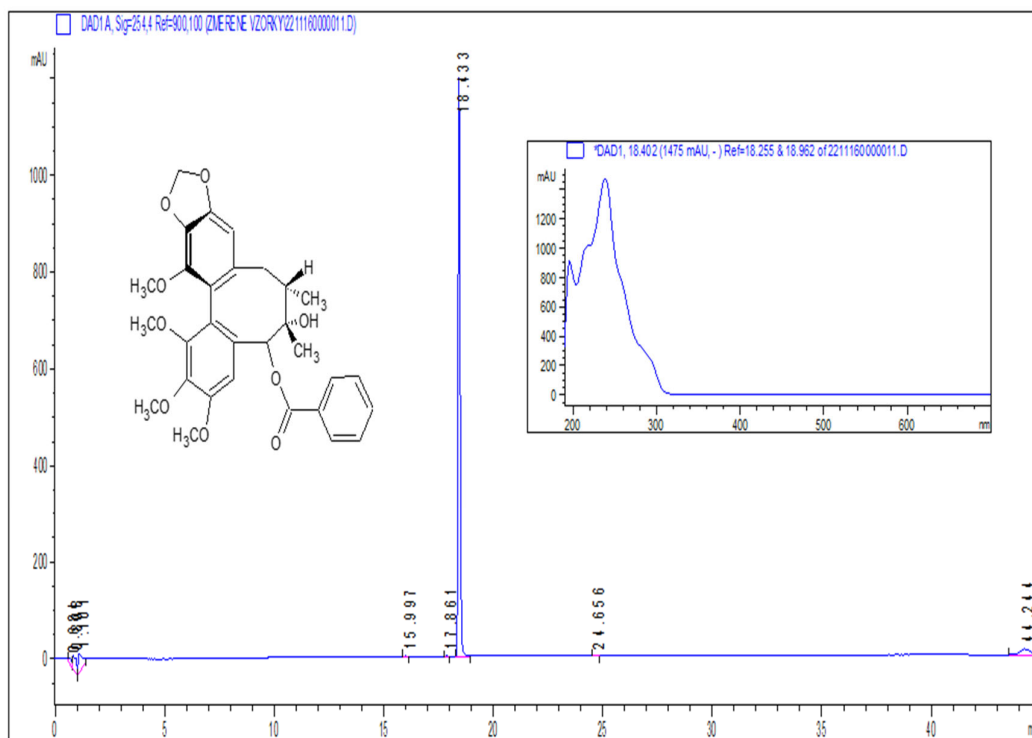

Figure S33. HPLC-DAD chromatogram of compound 4

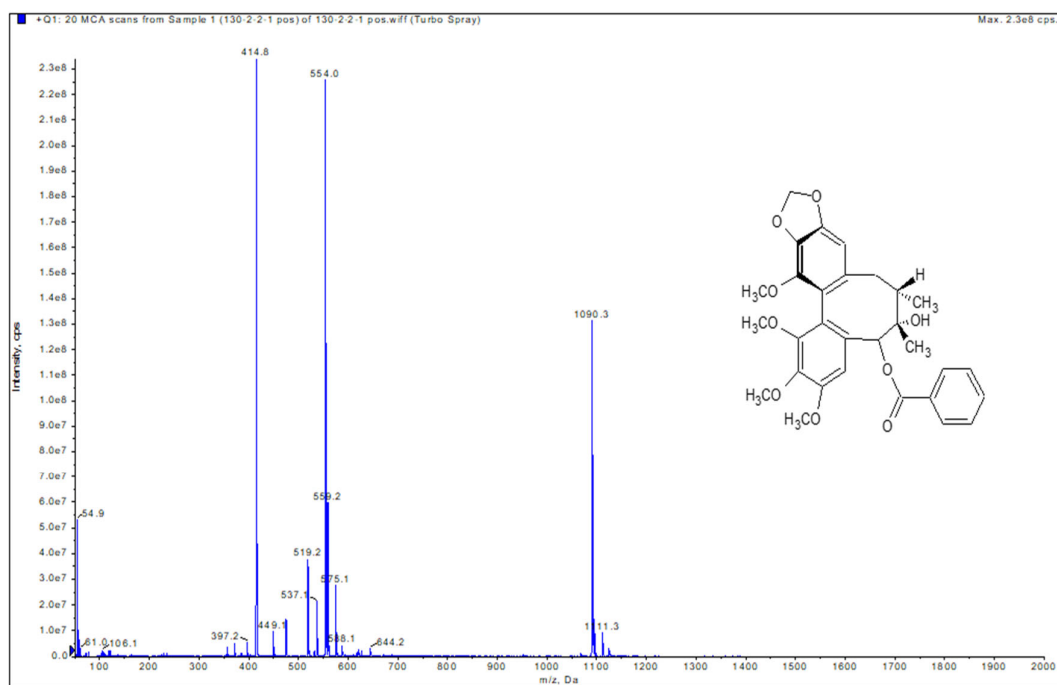

Figure S34. LR-MS chromatogram of compound 4

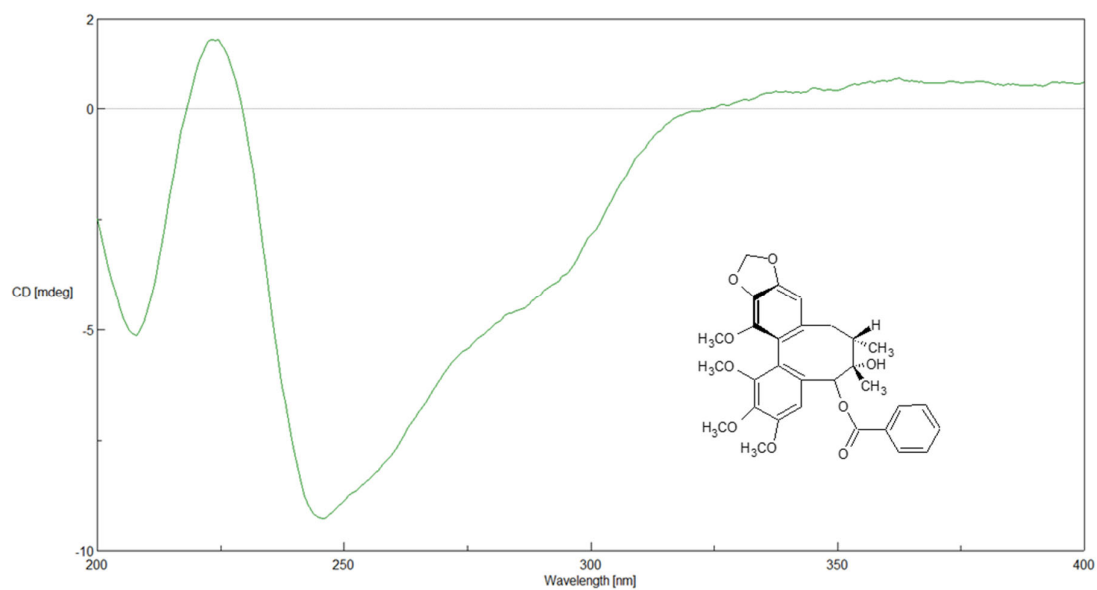

Figure S35. CD spectrum of compound **4** in methanol ( $c = 1 \text{ mg/mL}$ )

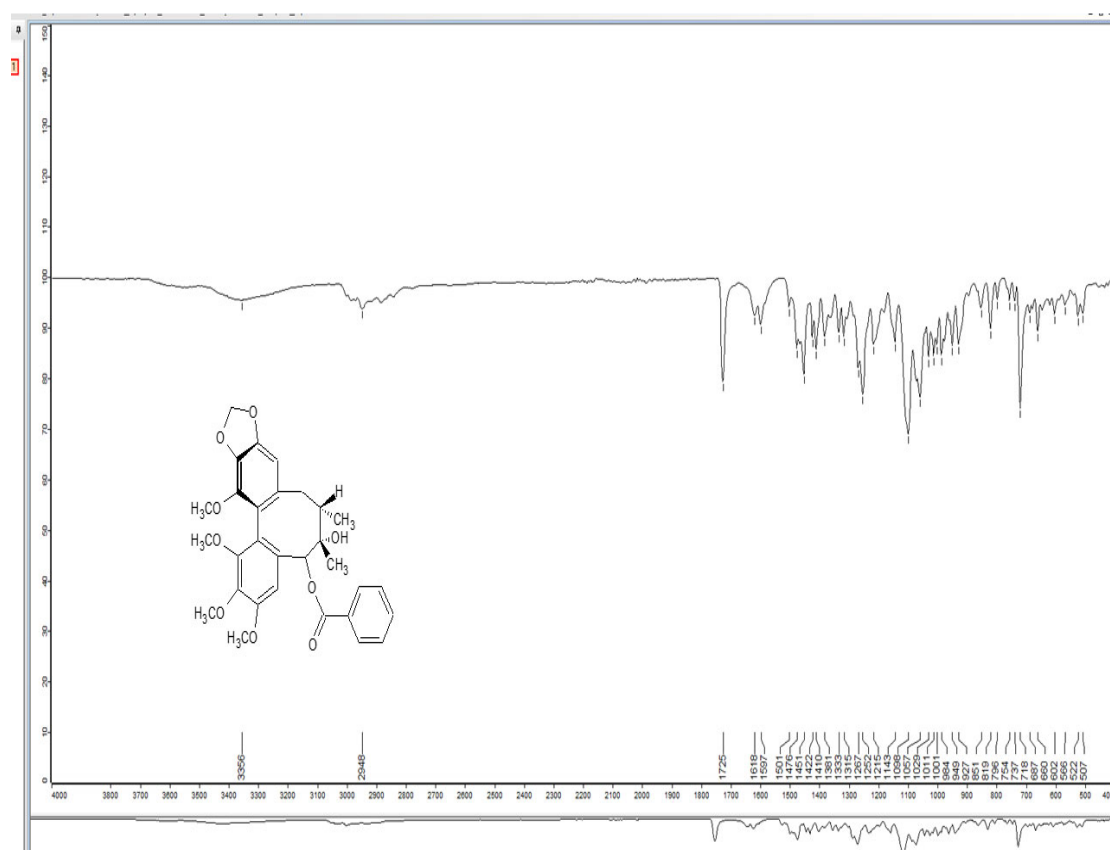

Figure S36. IR spectrum of compound **4**



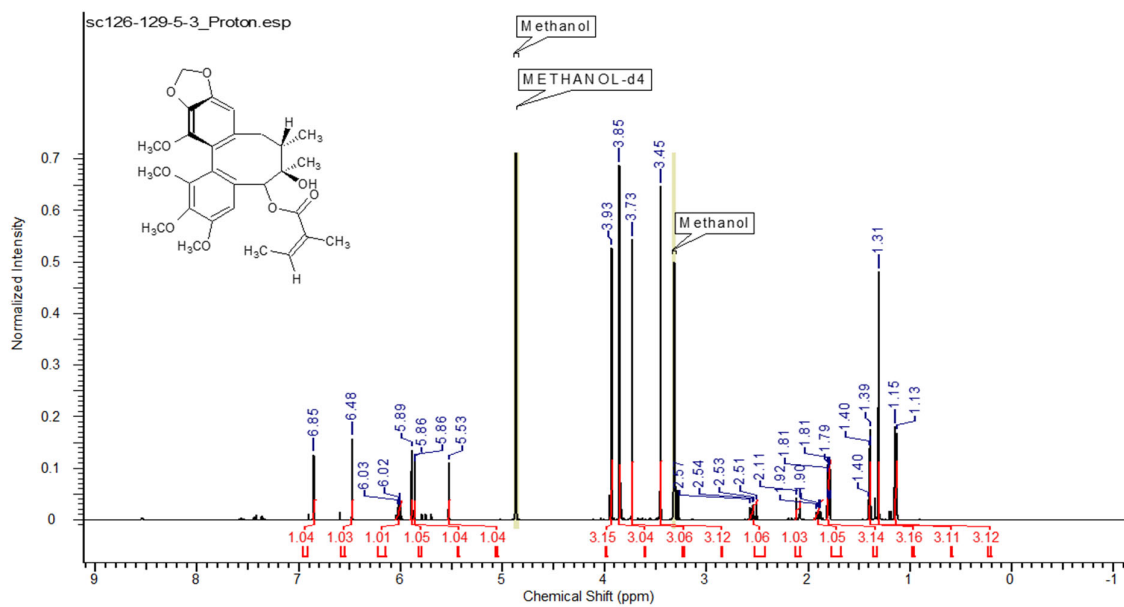

Figure S37. <sup>1</sup>H NMR spectrum of compound 5 in CD<sub>3</sub>OD

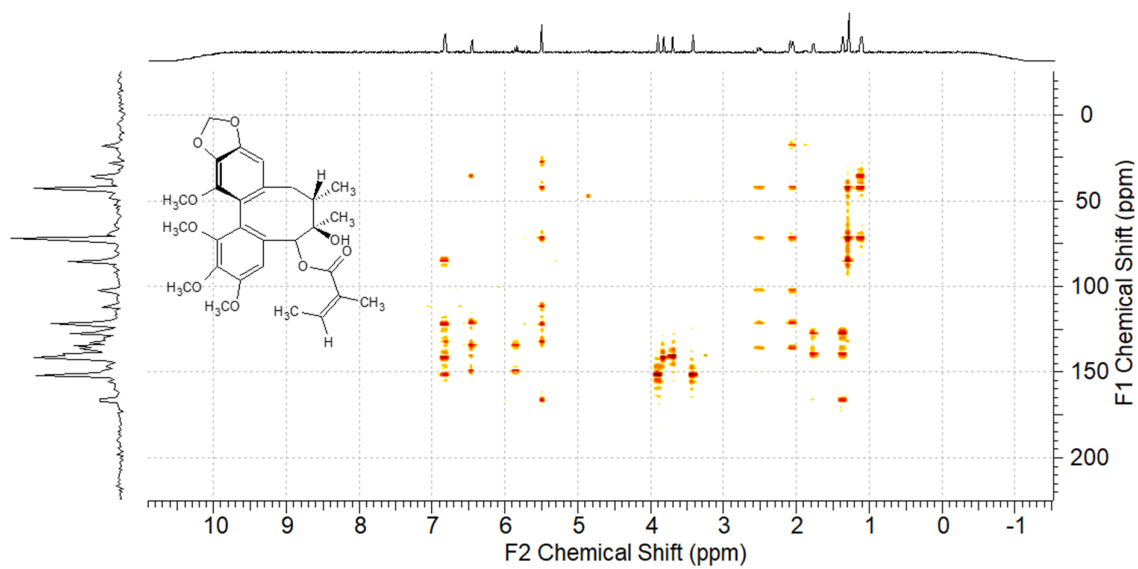

Figure S38. HMBC NMR spectrum of compound 5 in CD<sub>3</sub>OD

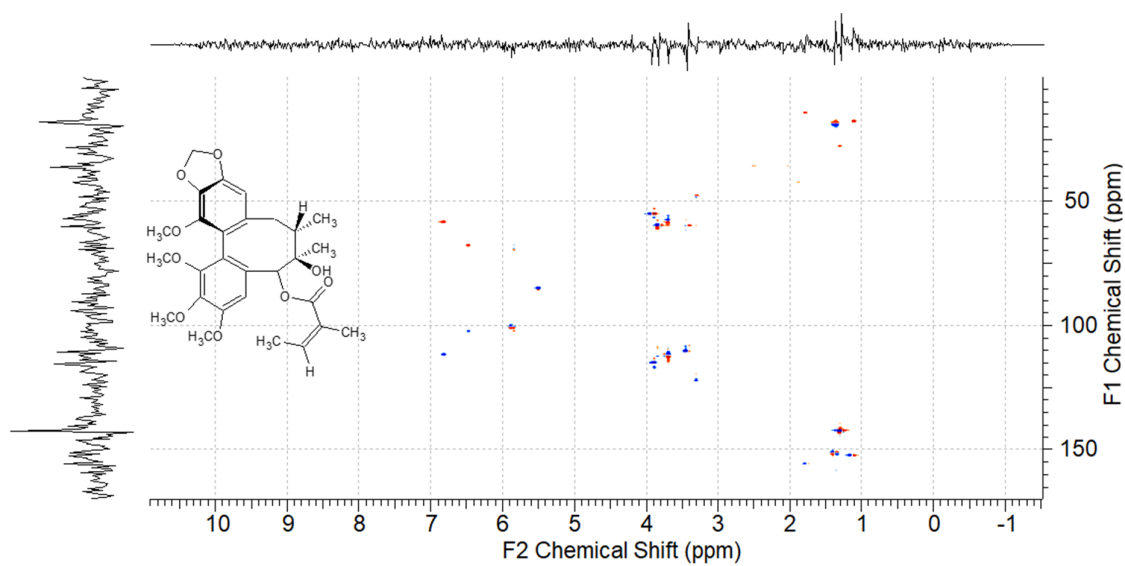

Figure S39. HSQC NMR spectrum of compound 5 in  $\text{CD}_3\text{OD}$

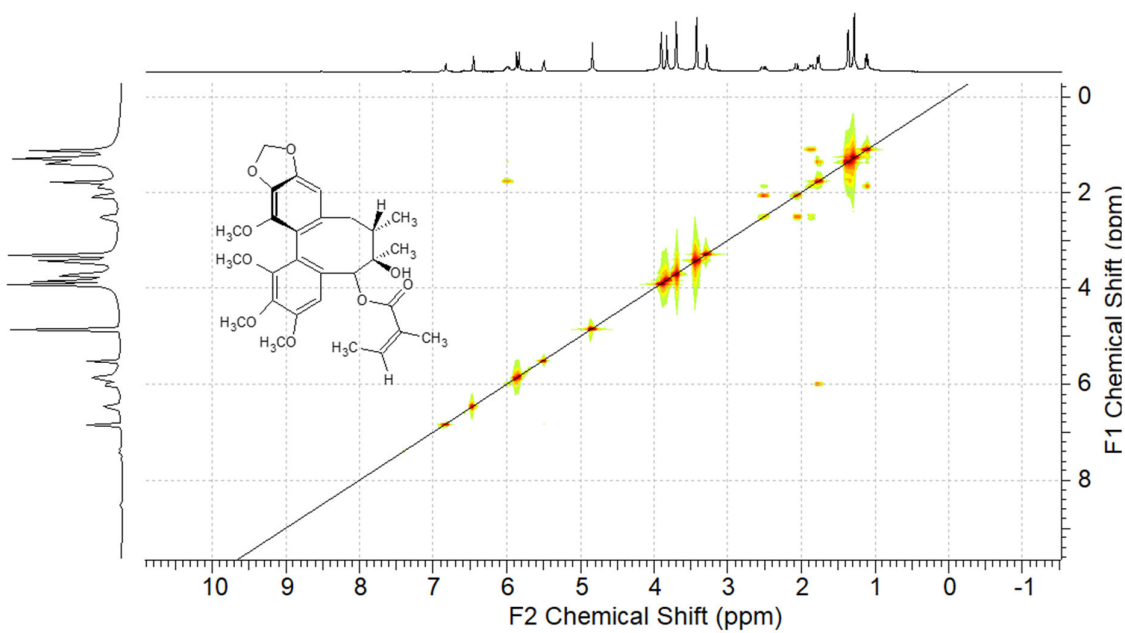

Figure S40. COSY NMR spectrum of compound 5 in  $\text{CD}_3\text{OD}$

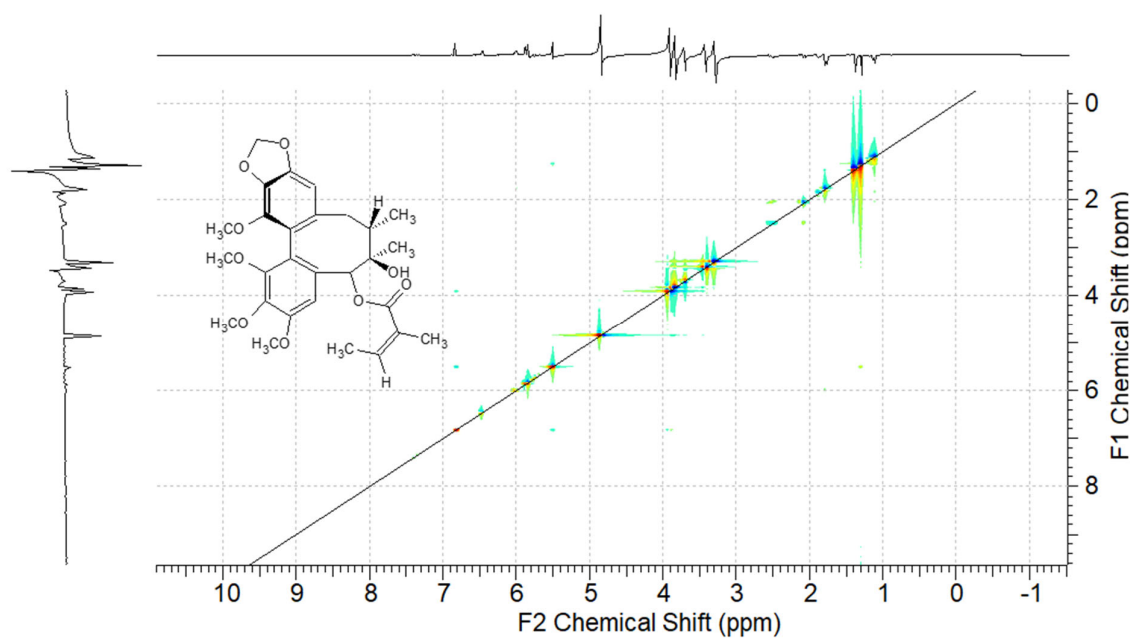

Figure S41. NOESY NMR spectrum of compound 5 in CD<sub>3</sub>OD

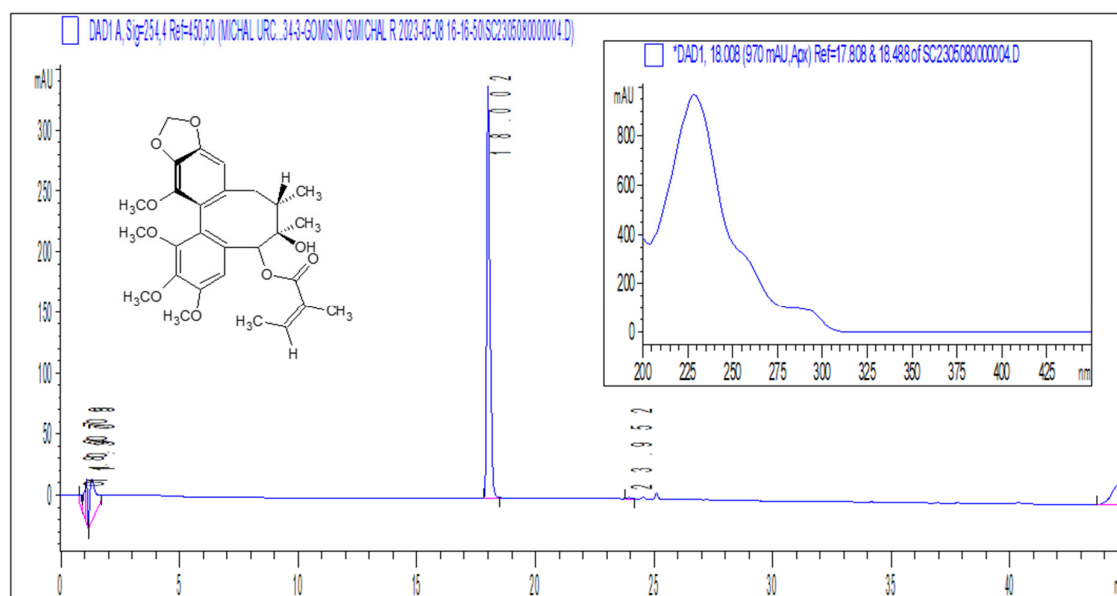

Figure S42. HPLC-DAD chromatogram of compound 5

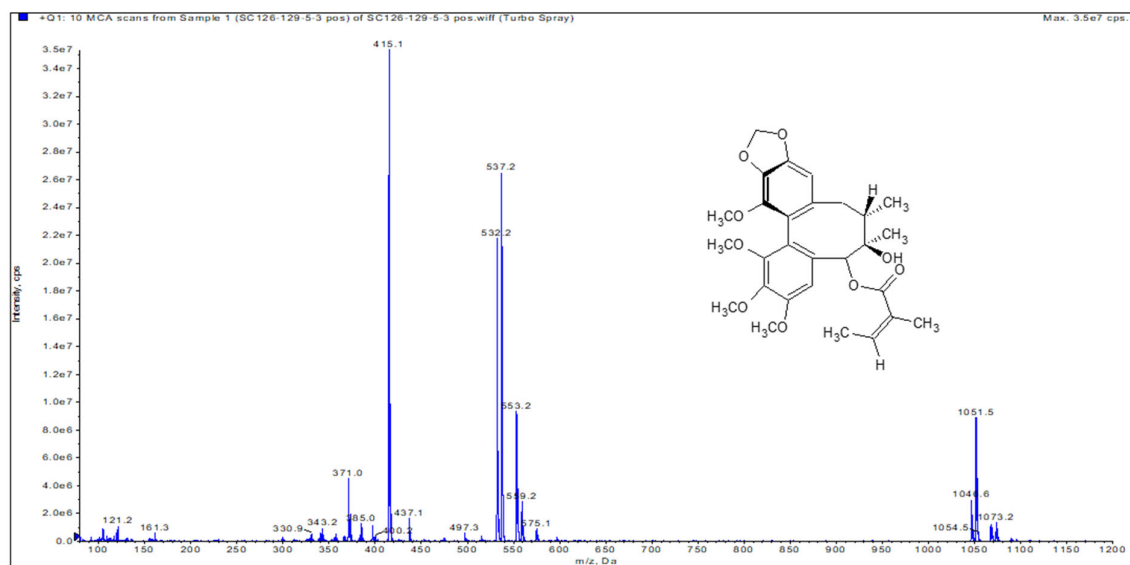

Figure S43. LR-MS spectrum of compound 5

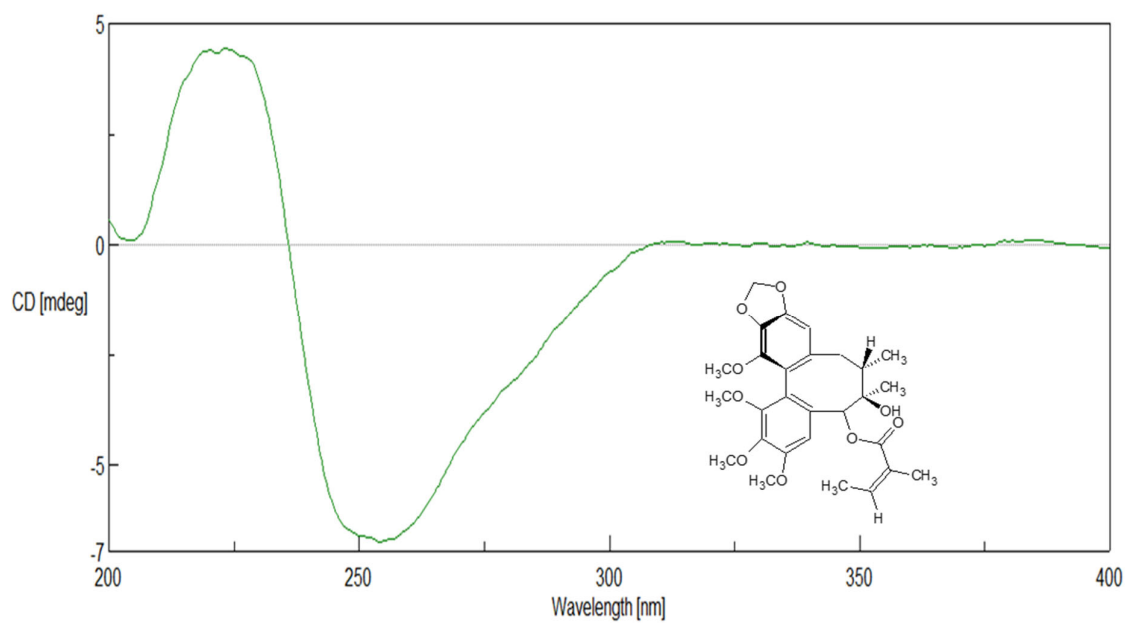

Figure S44. CD spectrum of compound 5 in methanol (c=1 mg/mL)

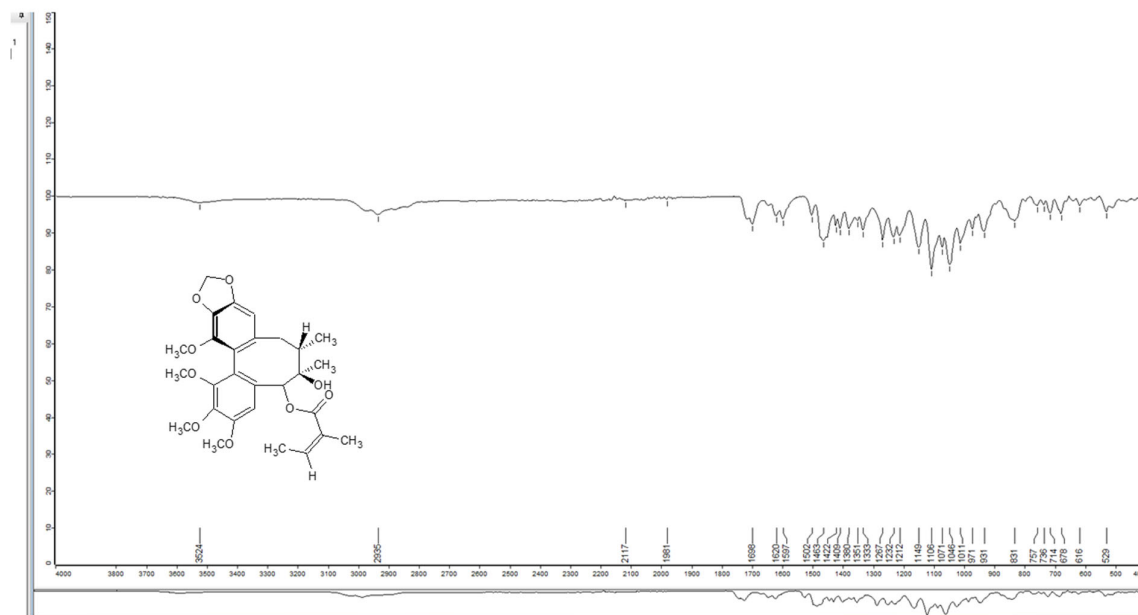

Figure S45. IR spectrum of compound **5**

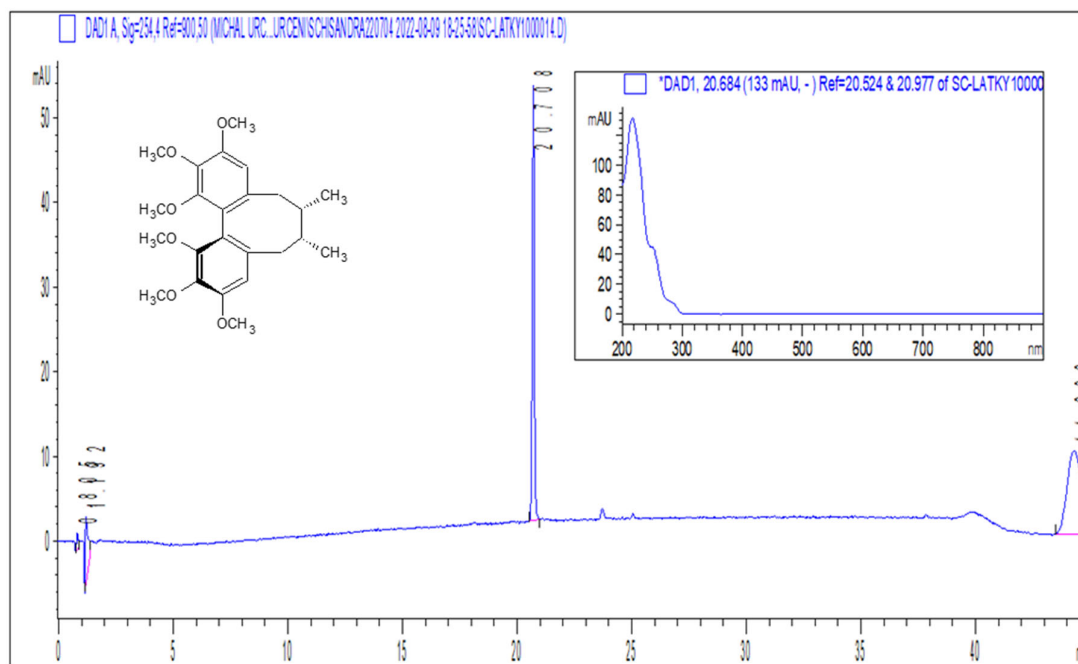

Figure S46. HPLC-DAD chromatogram of common injection of compound **6** with standard of (+)-deoxyschisandrin; UV spectrum of peak corresponding to (+)-deoxyschisandrin.

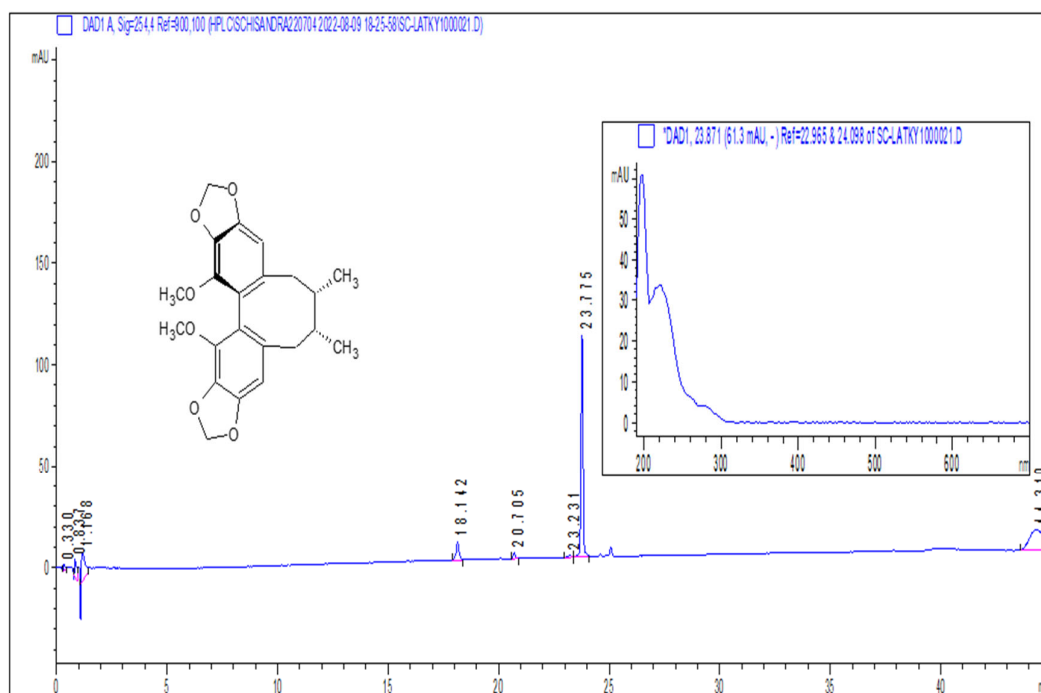

Figure S47. HPLC-DAD chromatogram of common injection of (-)-wuweizisu C with standard of (-)-wuweizisu C; UV spectrum of peak corresponding to (-)-wuweizisu C.

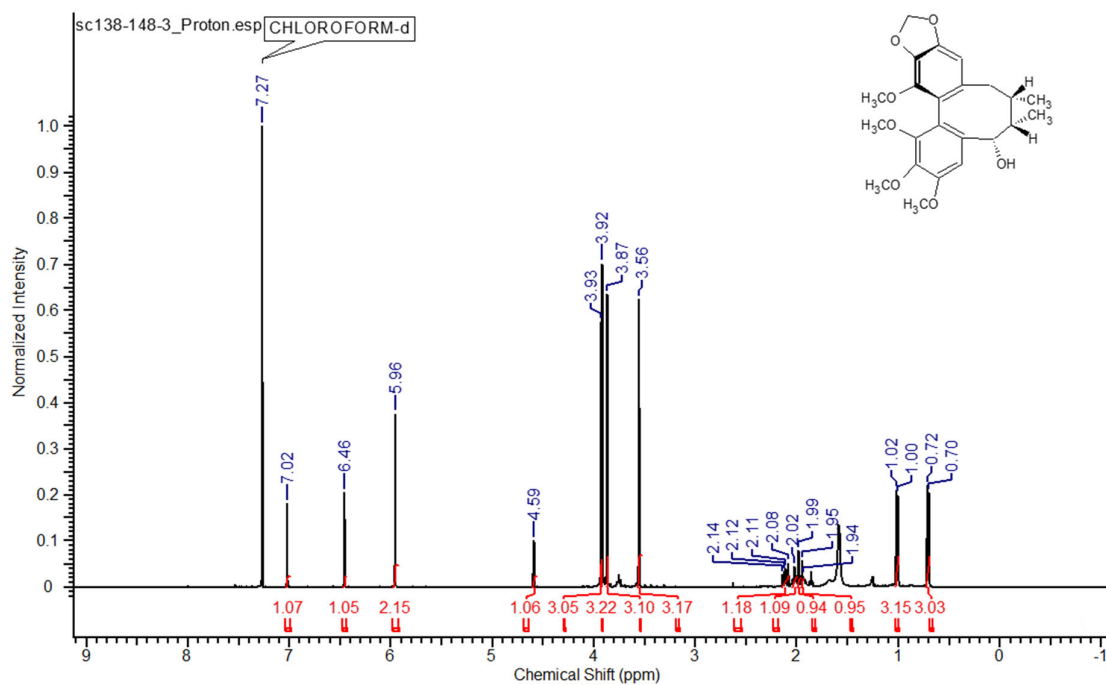

Figure S48. <sup>1</sup>H NMR spectrum of epigomisin O in CDCl<sub>3</sub>

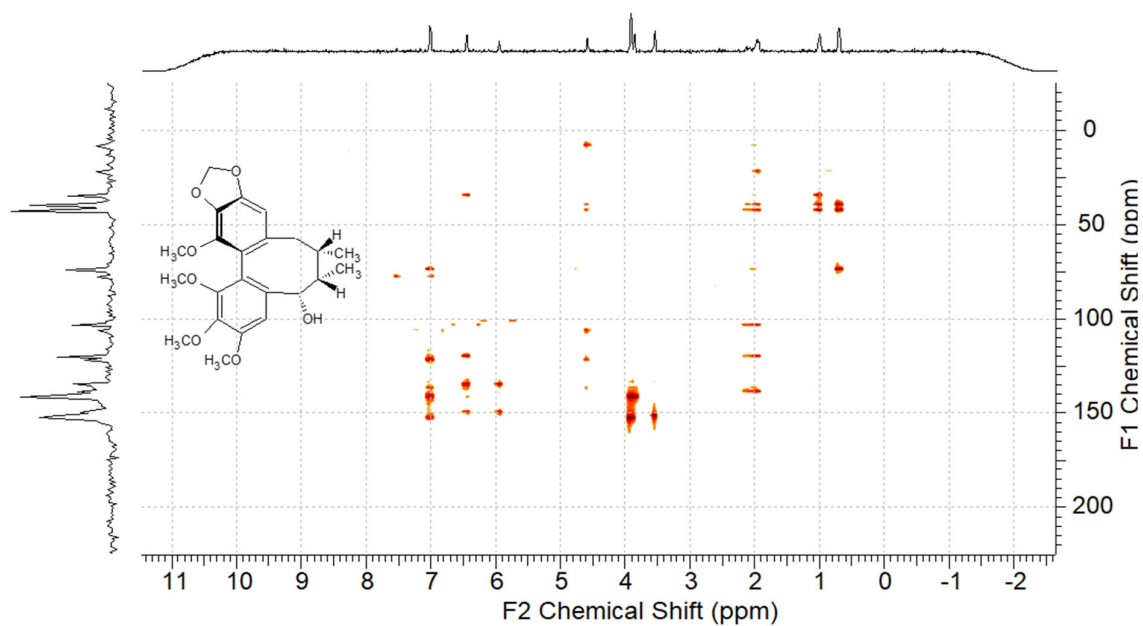

Figure S49. HMBC NMR spectrum of epigomisin O in CDCl<sub>3</sub>

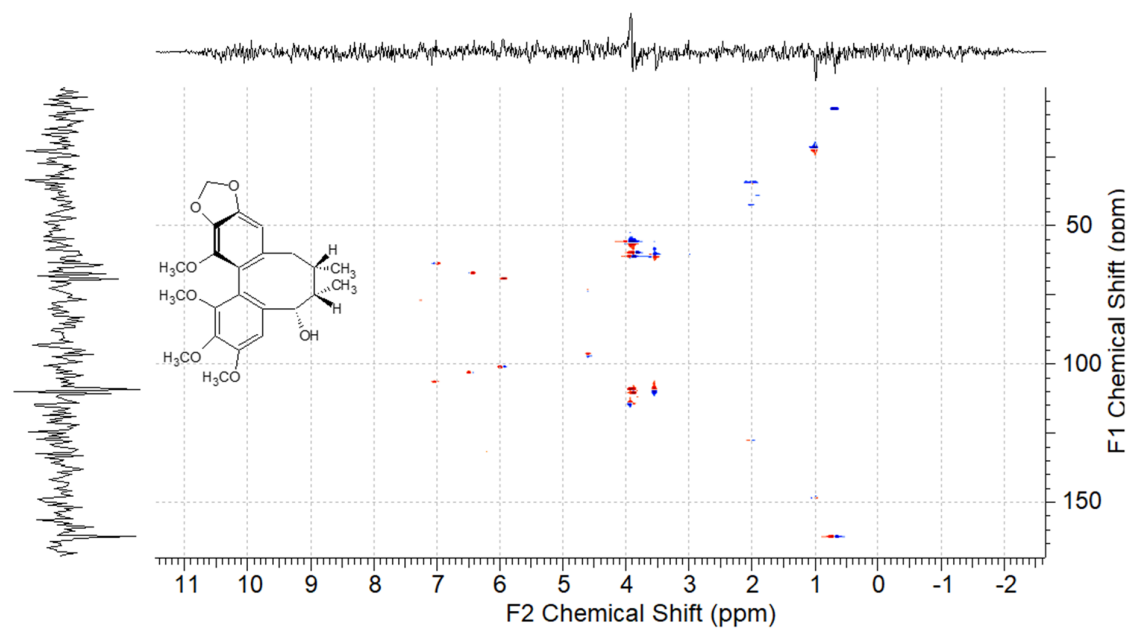

Figure S50. HSQC NMR spectrum of epigomisin O in CDCl<sub>3</sub>

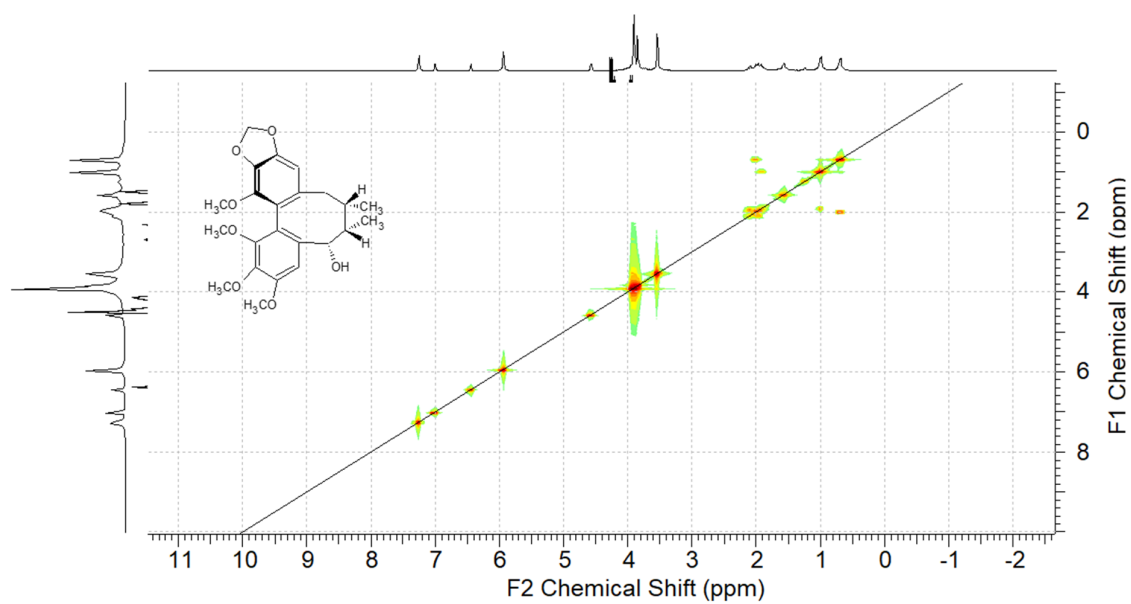

Figure S51. COSY NMR spectrum of epigomisin O in  $\text{CDCl}_3$

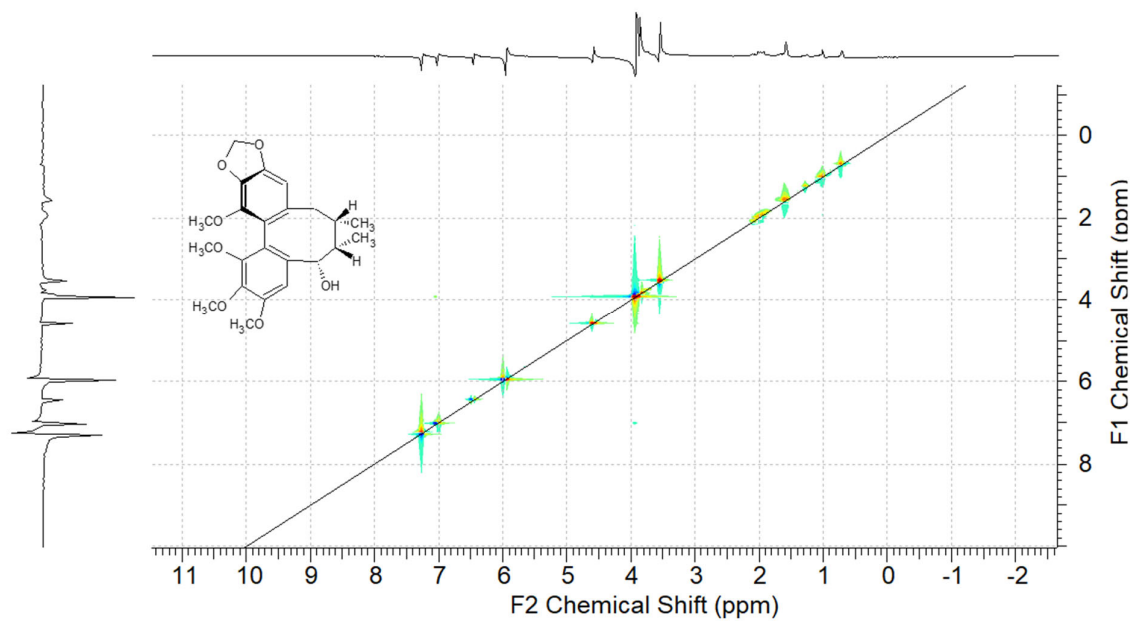

Figure S52. NOESY NMR spectrum of epigomisin O in  $\text{CDCl}_3$



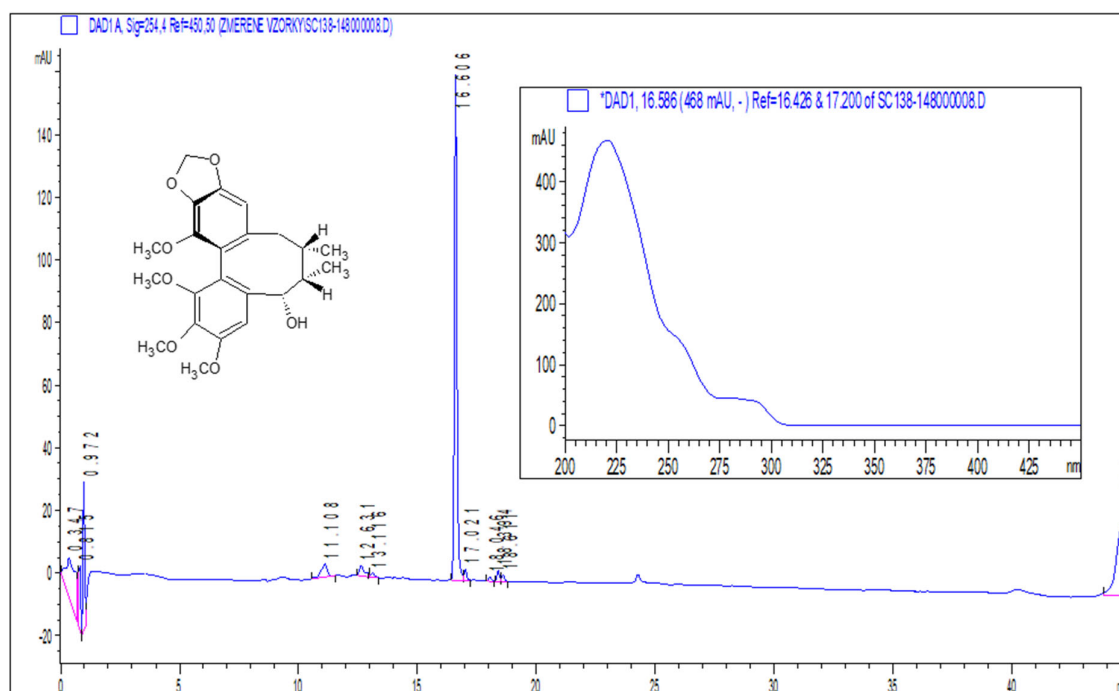

Figure S53. HPLC-DAD chromatogram of epigomisin O

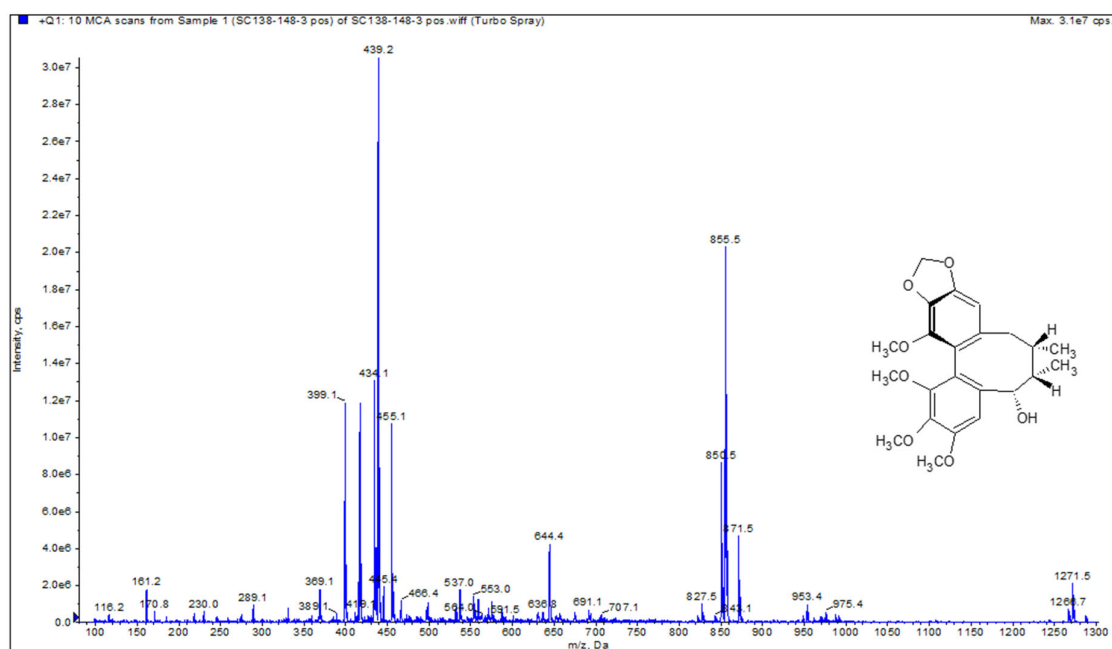

Figure S54. LR-MS spectrum of epigomisin O

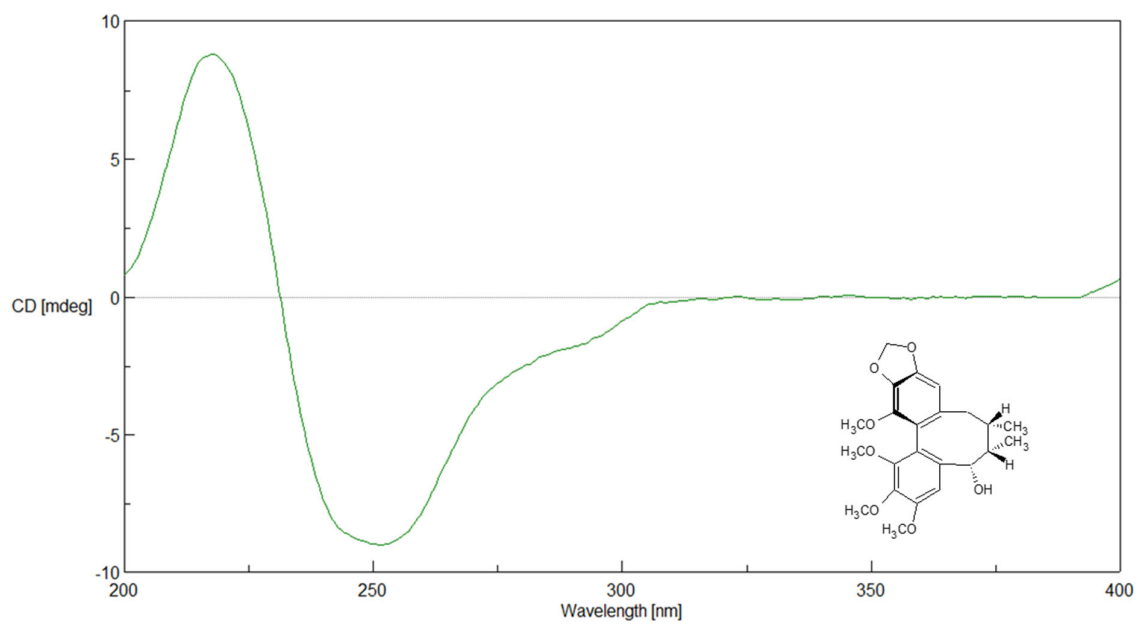

Figure S55. CD spectrum of epigomisin O in methanol ( $c=1$  mg/mL)

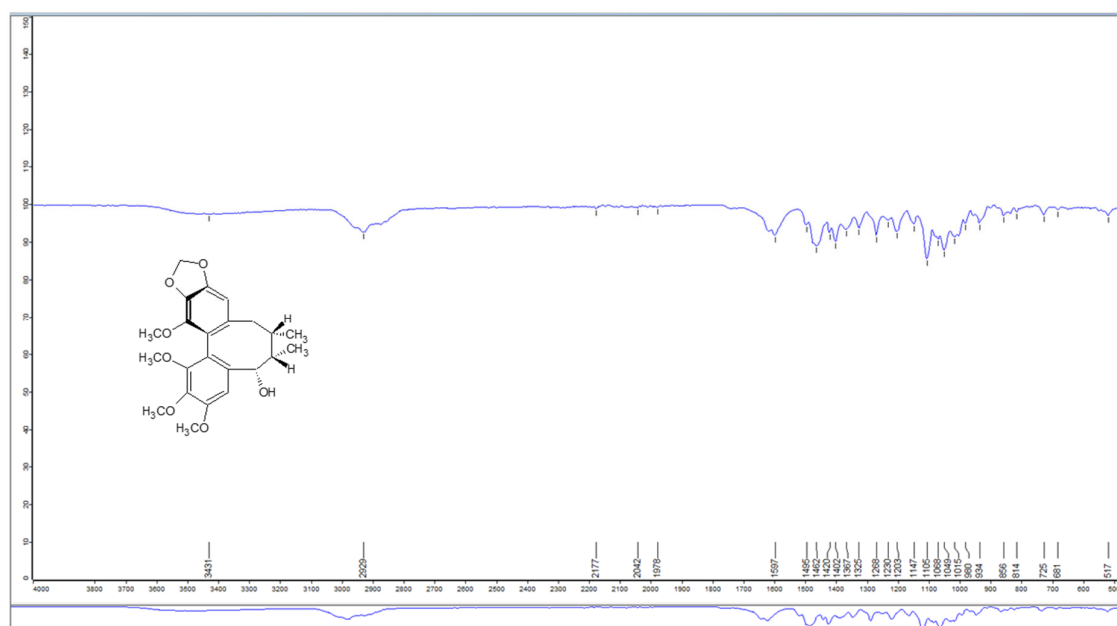

Figure S56. IR spectrum of epigomisin O

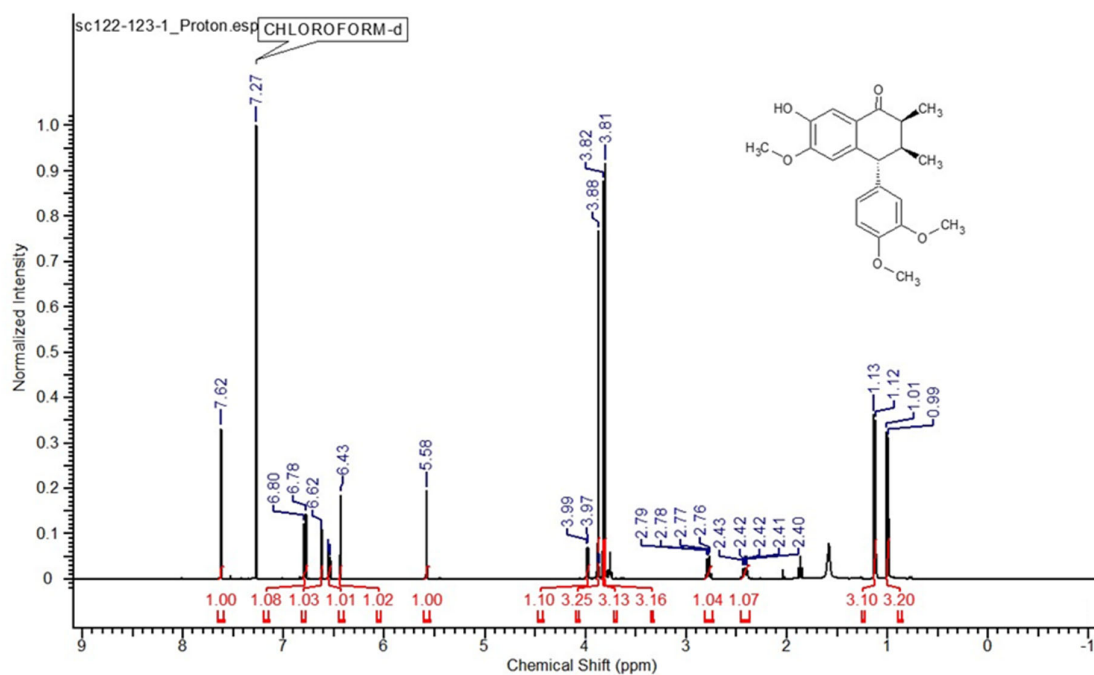

Figure S57.  $^1\text{H}$  NMR spectrum of arisantetralone C in  $\text{CDCl}_3$

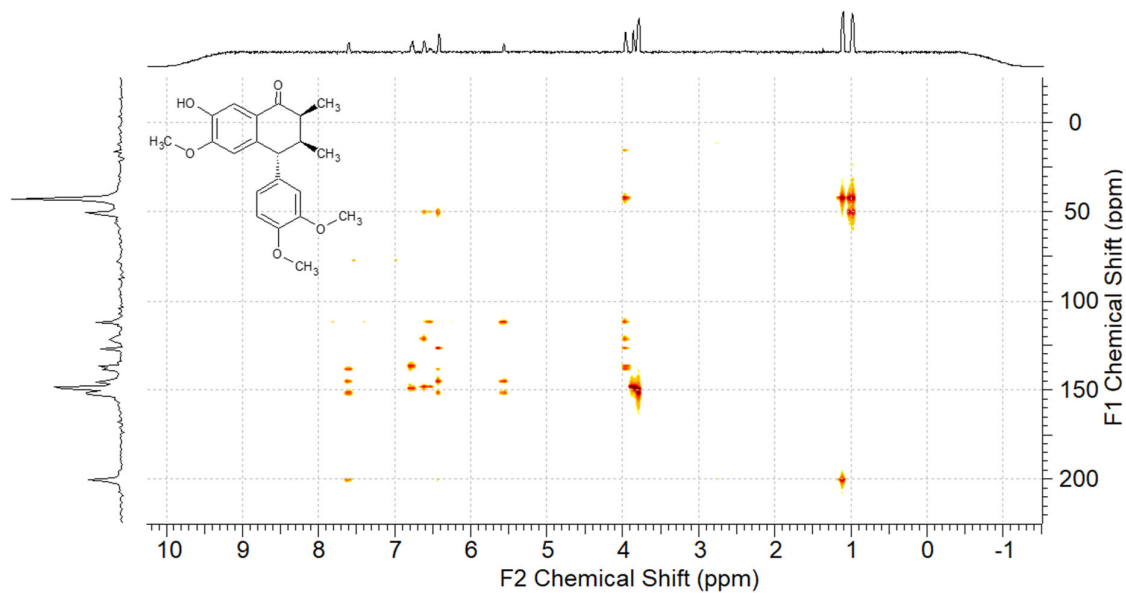

Figure S58. HMBC NMR spectrum of arisantetralone C in  $\text{CDCl}_3$

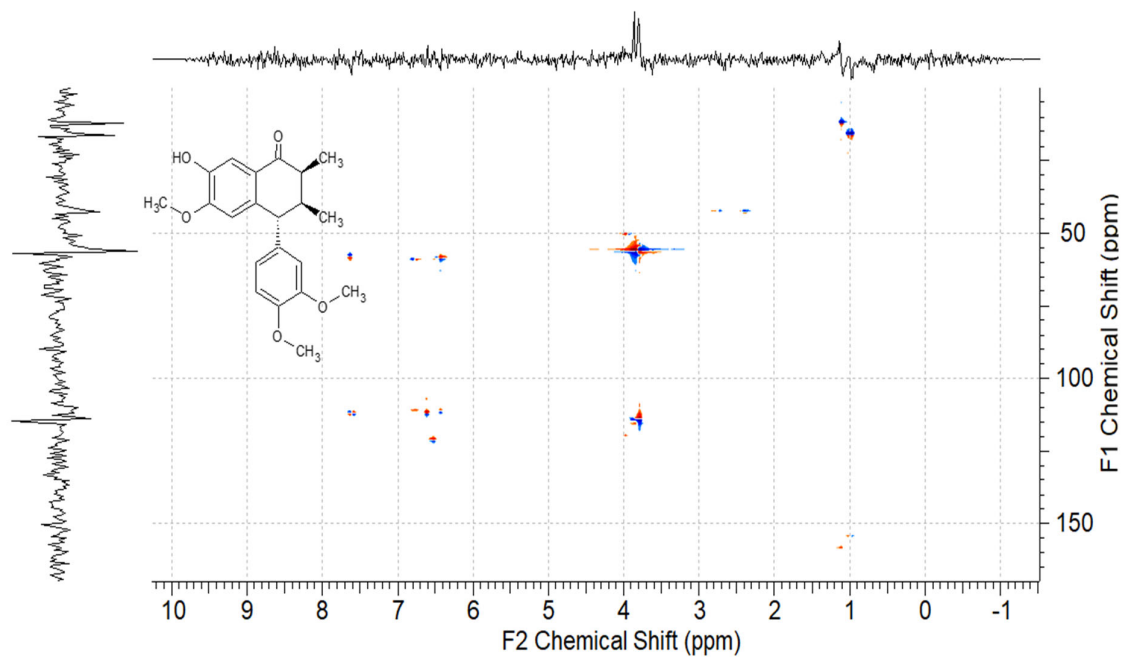

Figure S59. HSQC NMR spectrum of arisantetralone C in  $\text{CDCl}_3$

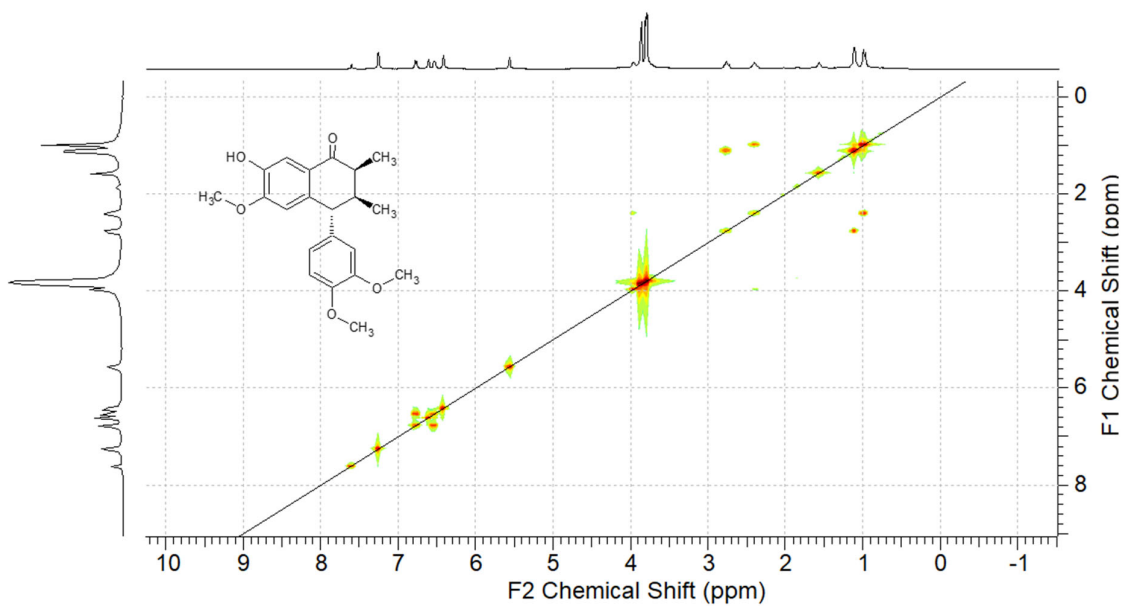

Figure S60. COSY NMR spectrum of arisantetralone C in  $\text{CDCl}_3$

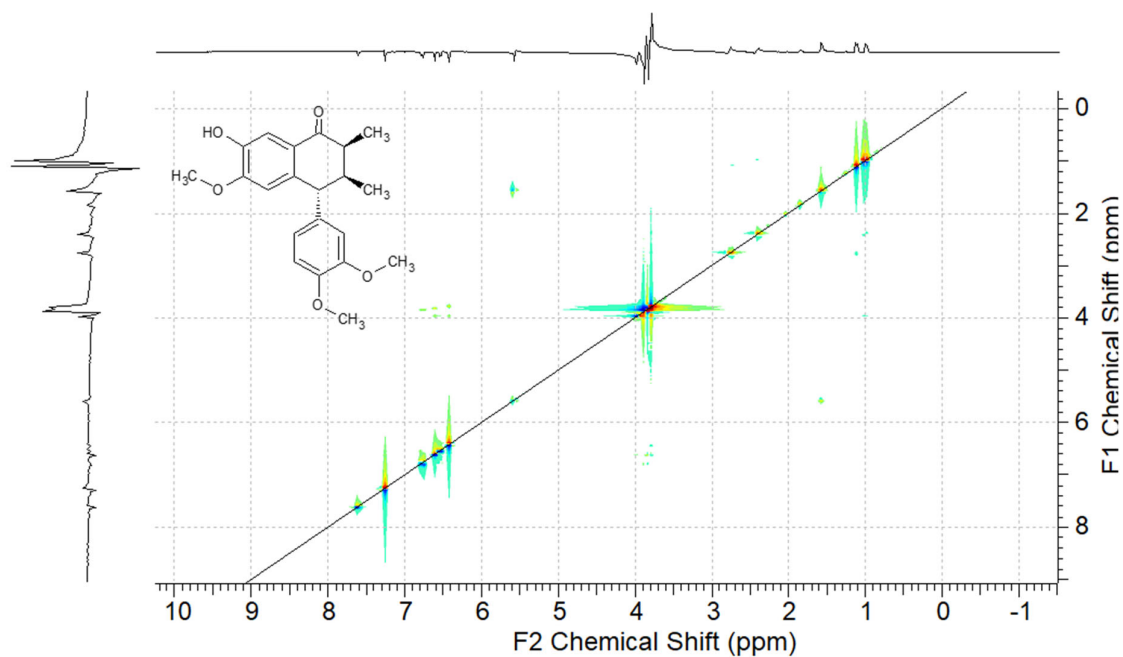

Figure S61. NOESY NMR spectrum of arisantetralone C in  $\text{CDCl}_3$

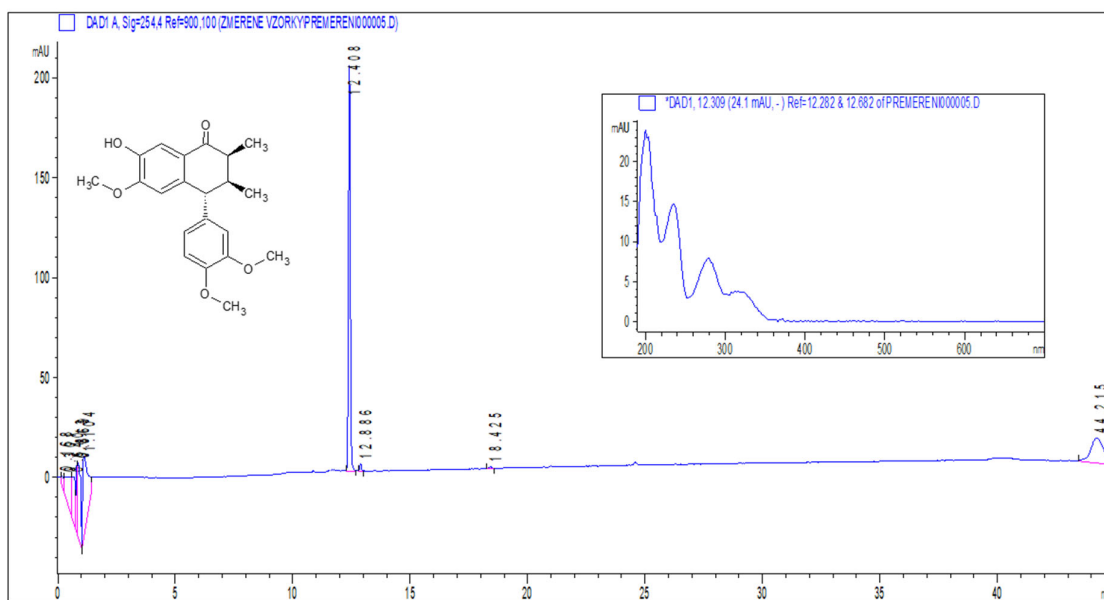

Figure S62. HPLC-DAD chromatogram of arisantetralone C

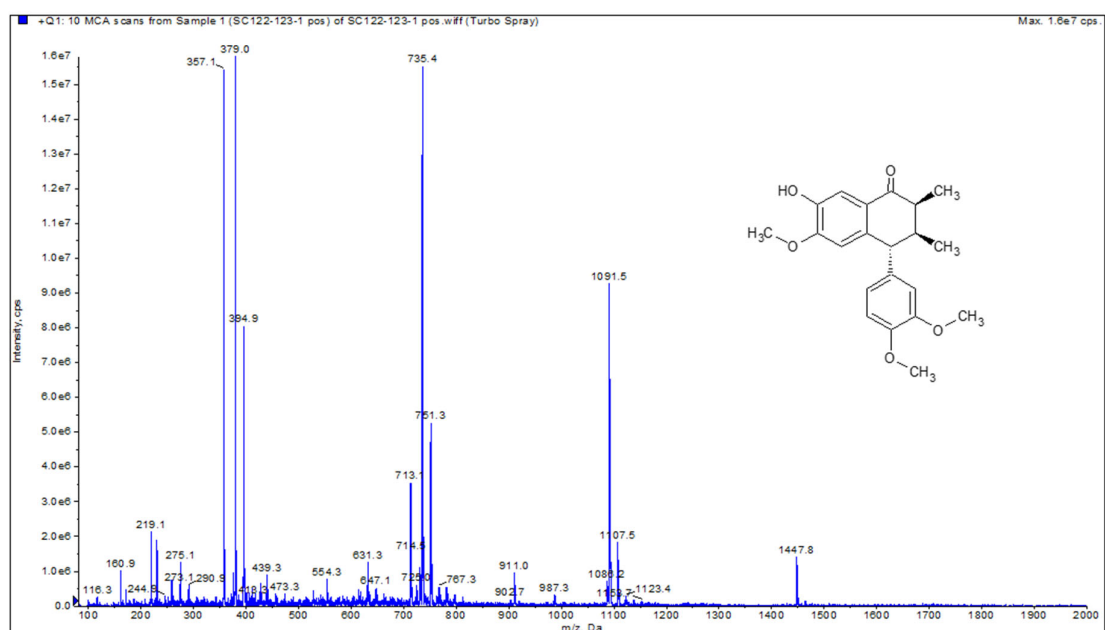

Figure S63. LR-MS spectrum of arisantetralone C

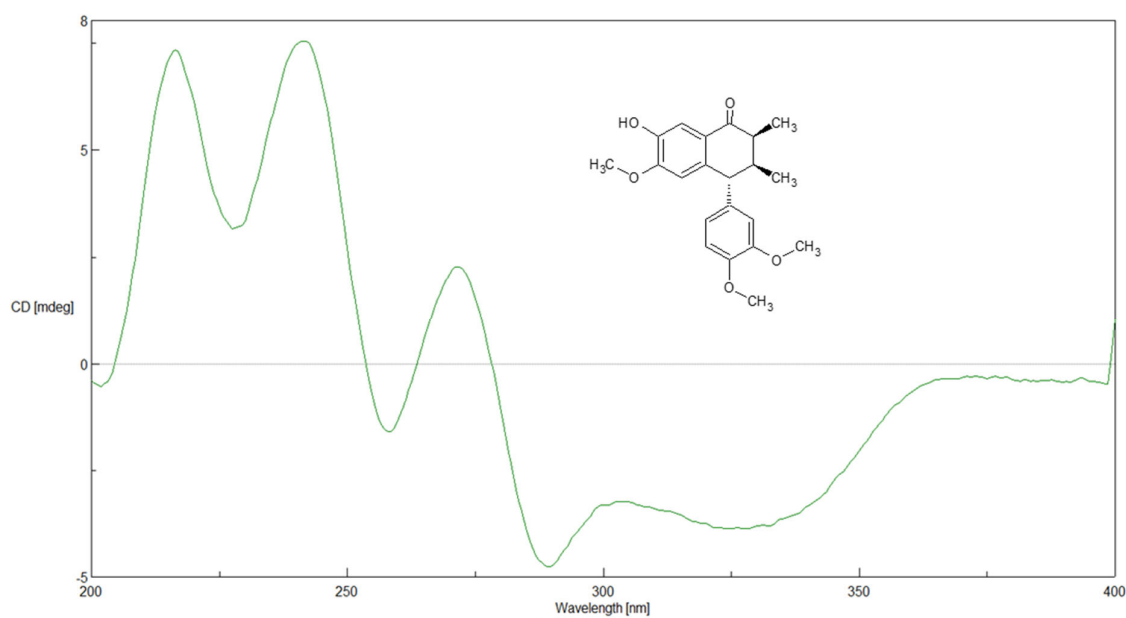

Figure S64. CD spectrum of arisantetralone C in methanol (c=1 mg/mL)

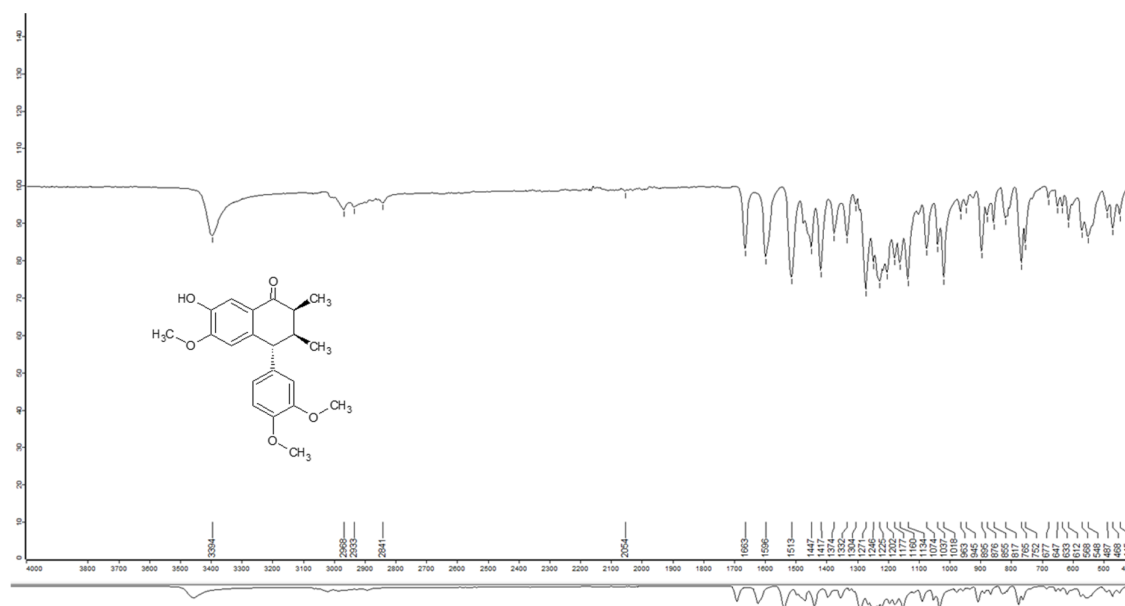

Figure S65. IR spectrum of arisantetralone C

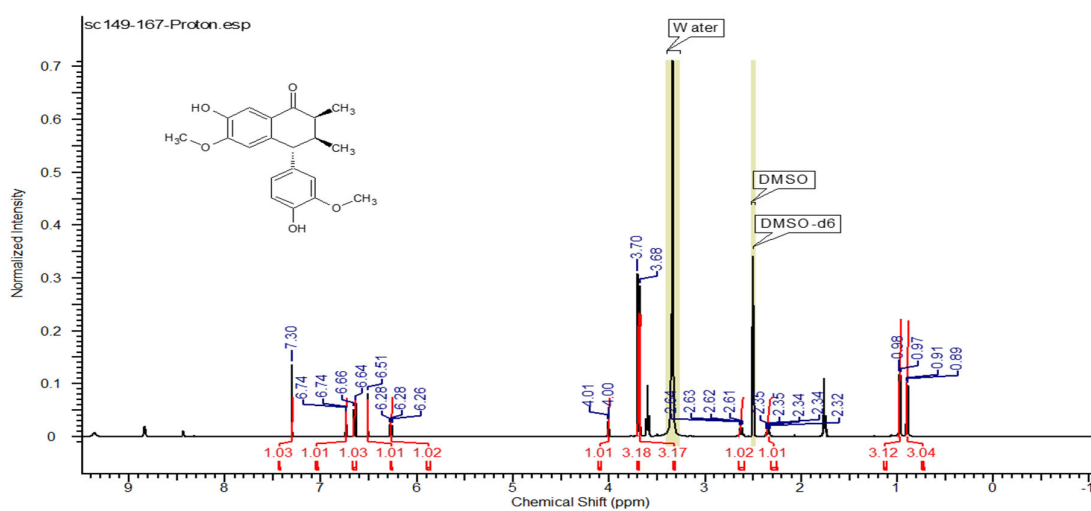

Figure S66. <sup>1</sup>H NMR spectrum of arisantetralone A in DMSO-*d*<sub>6</sub>

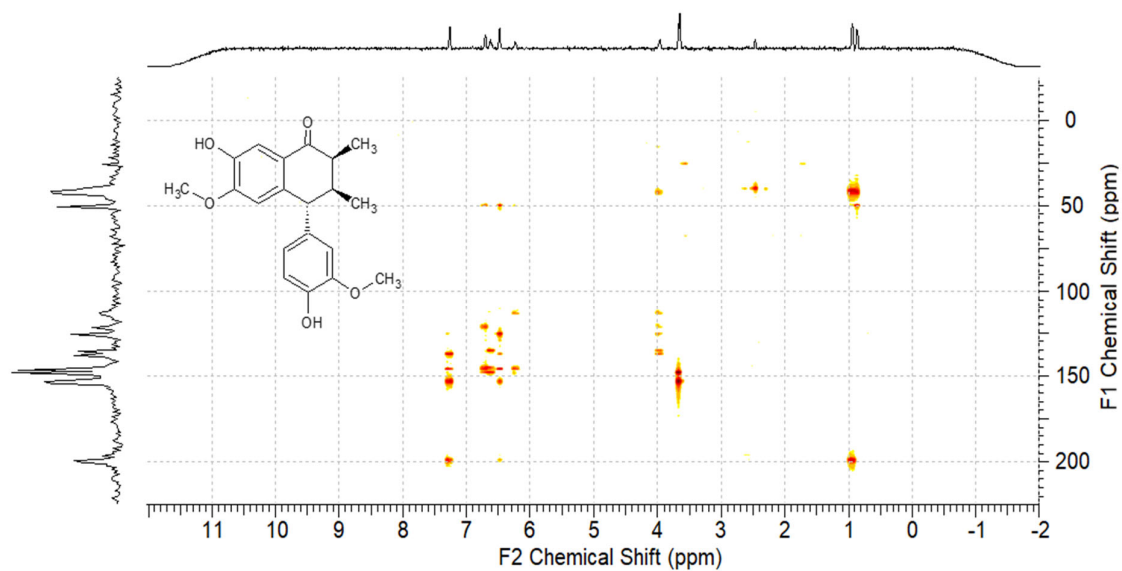

Figure S67. HMBC NMR spectrum of arisantetralone A in DMSO- $d_6$

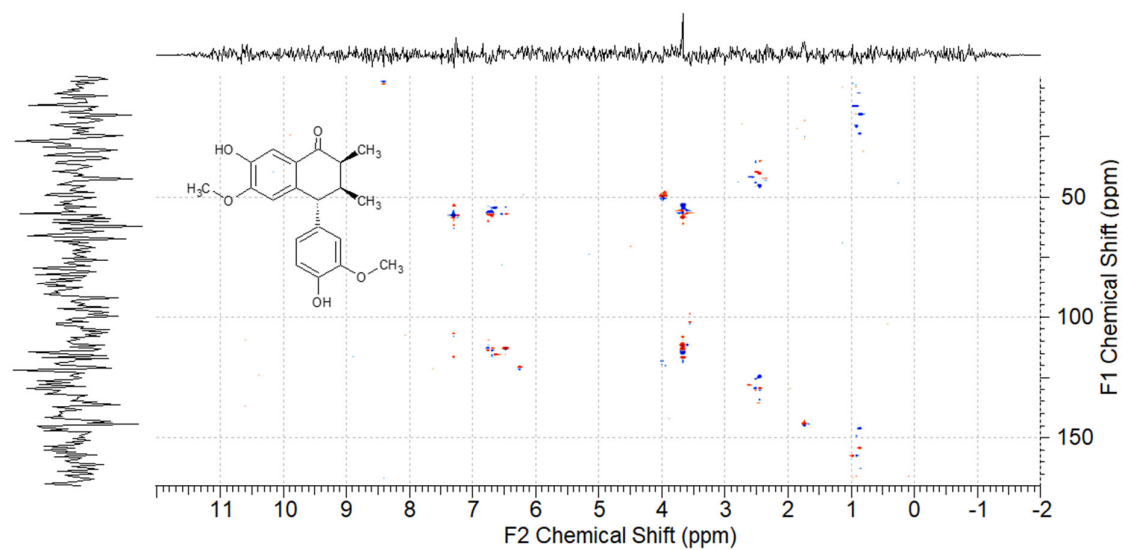

Figure S68. HSQC NMR spectrum of arisantetralone A in DMSO- $d_6$



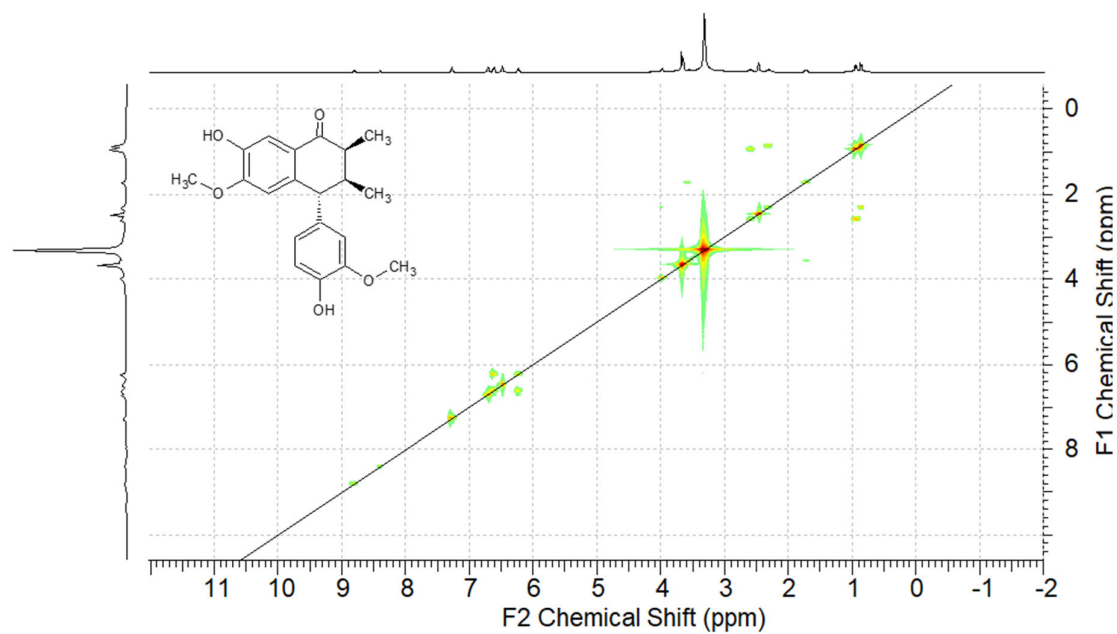

Figure 69. COSY NMR spectrum of arisantetralone A in DMSO- $d_6$

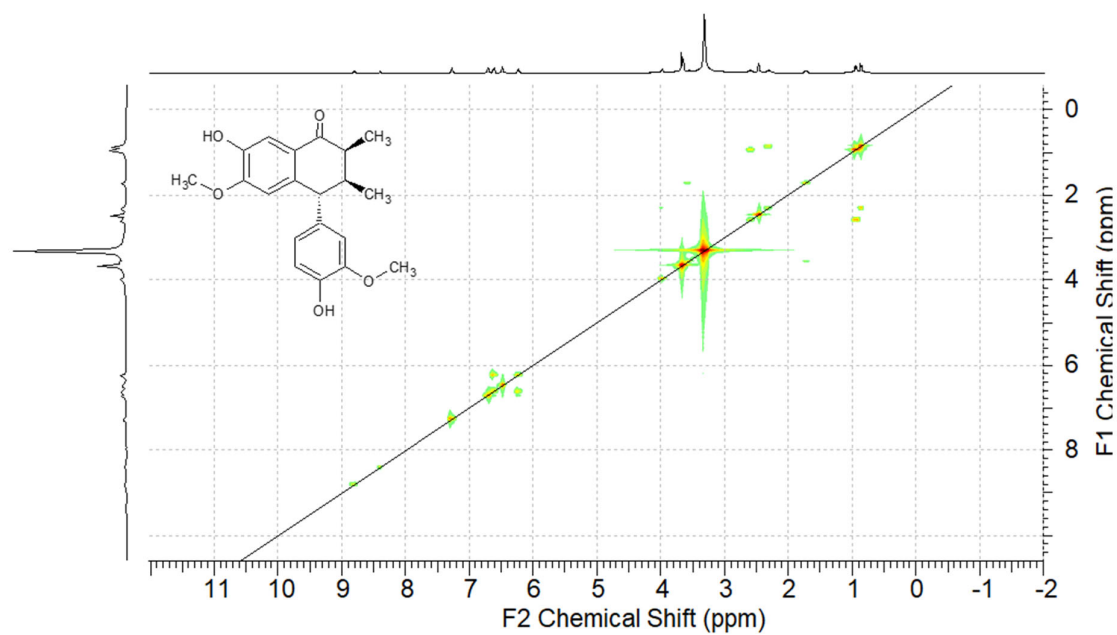

Figure S70. NOESY NMR spectrum of arisantetralone A in DMSO- $d_6$

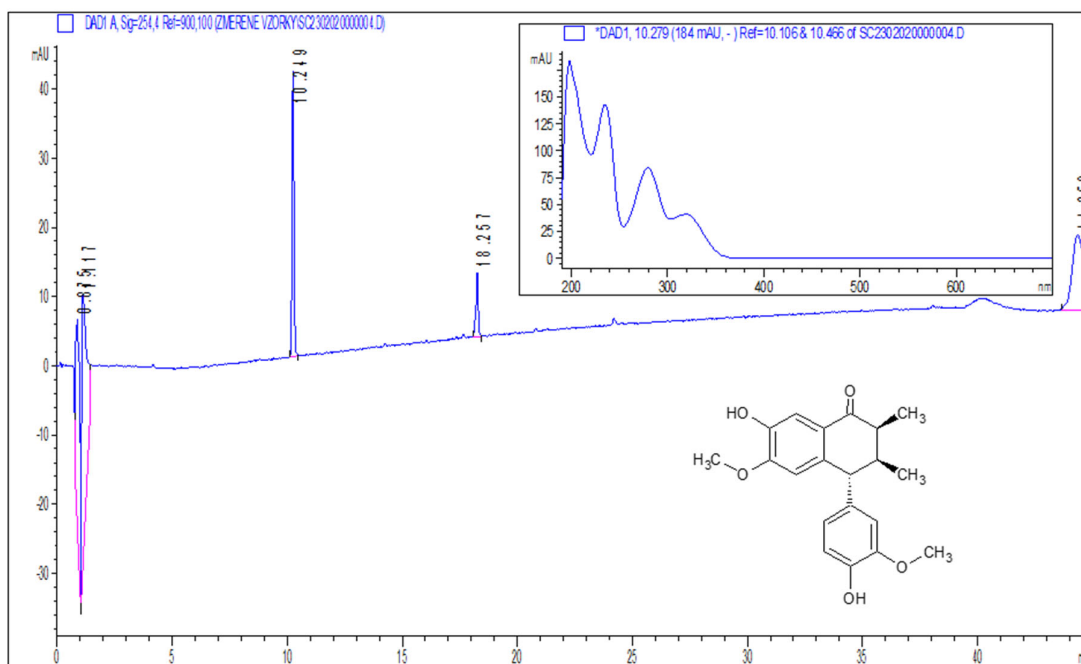

Figure S71. HPLC-DAD chromatogram of arisantetralone A

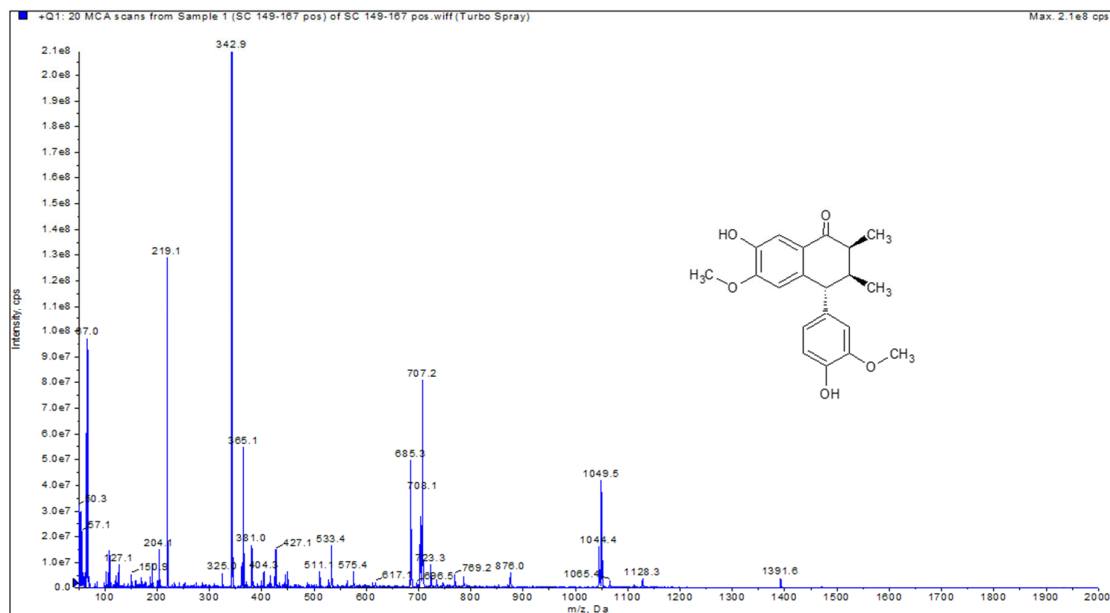

Figure S72. LR-MS spectrum of arisantetralone A

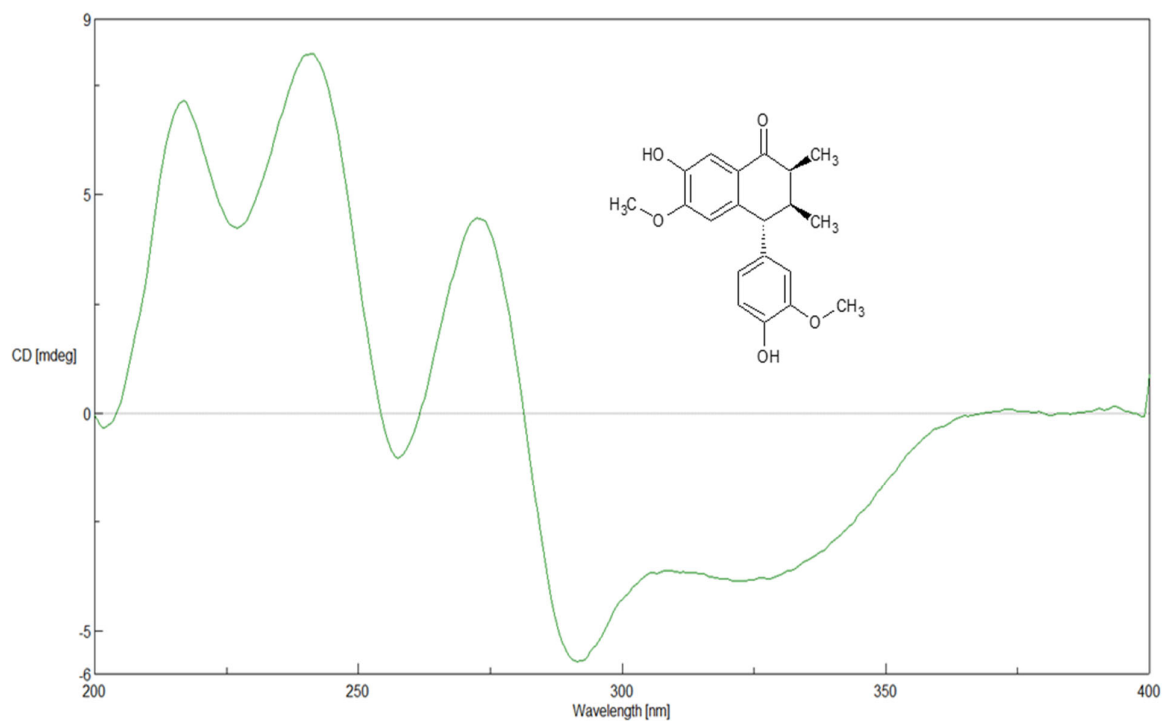

Figure S73. CD spectrum of arisantetralone A in methanol ( $c=1$  mg/mL)

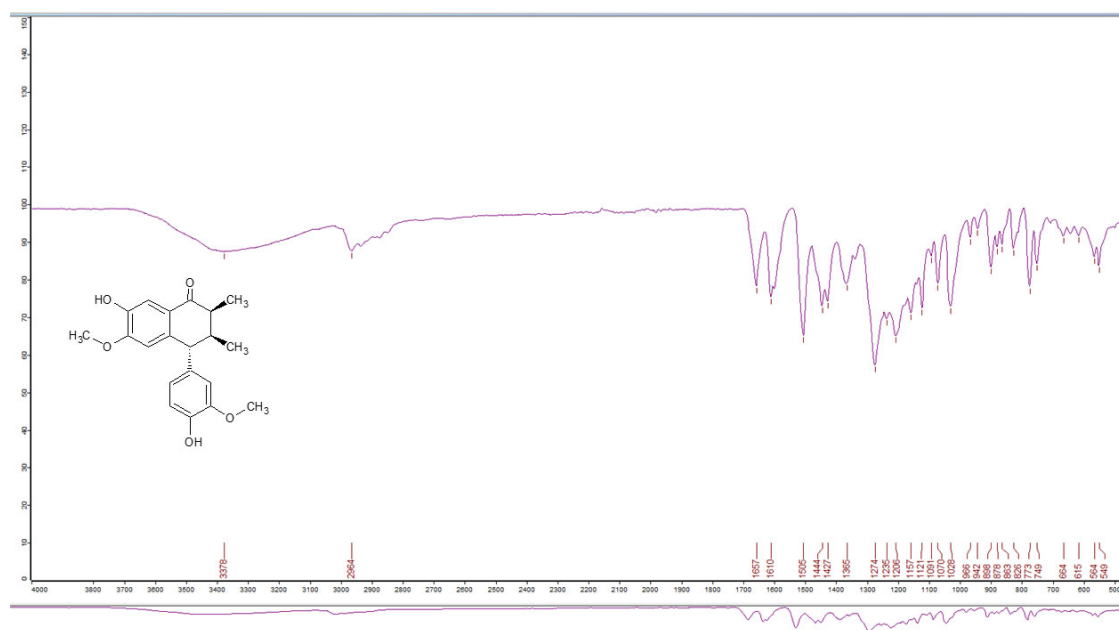

Figure S74. IR spectrum of arisantetralone A

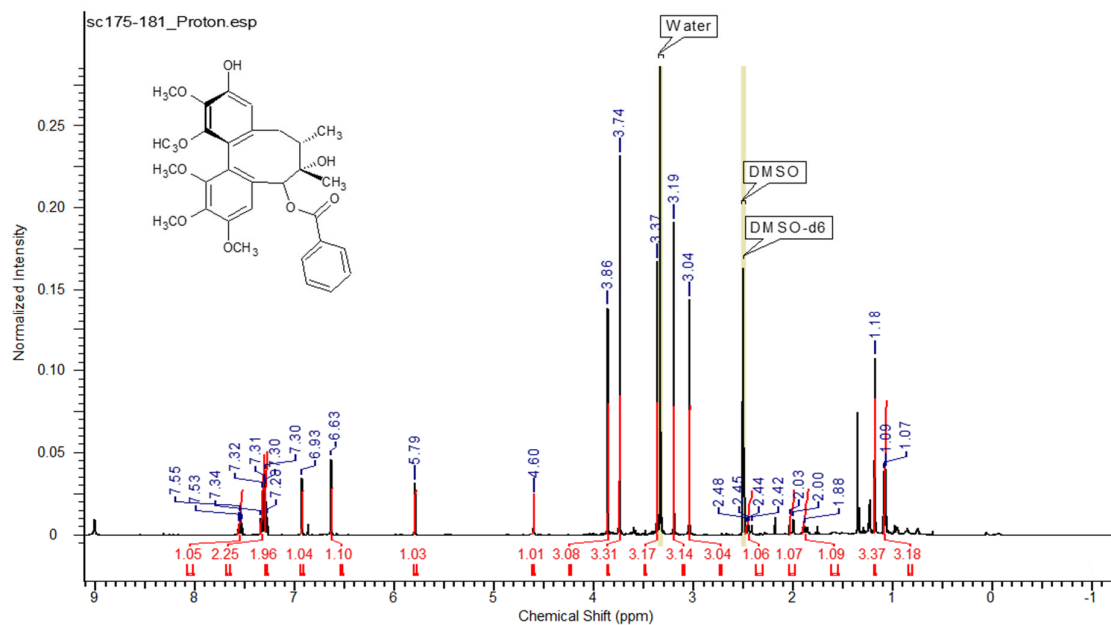

Figure S75.  $^1\text{H}$  NMR spectrum of (-)-schisantherin E in  $\text{DMSO}-d_6$

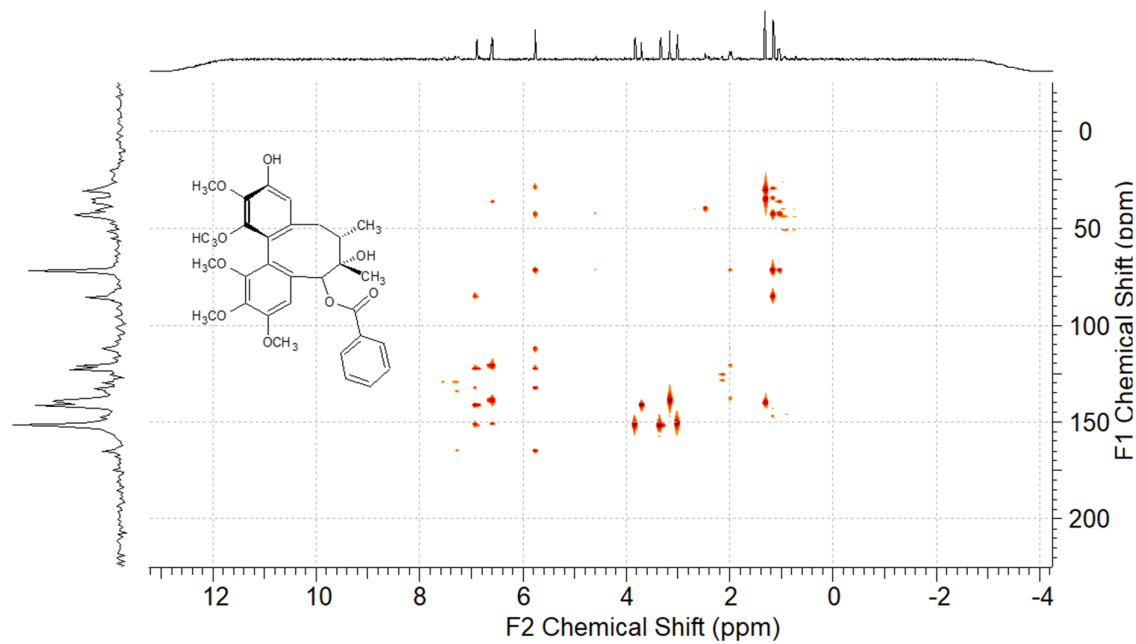

Figure S76. HMBC NMR spectrum of (-)-schisantherin E in  $\text{DMSO}-d_6$

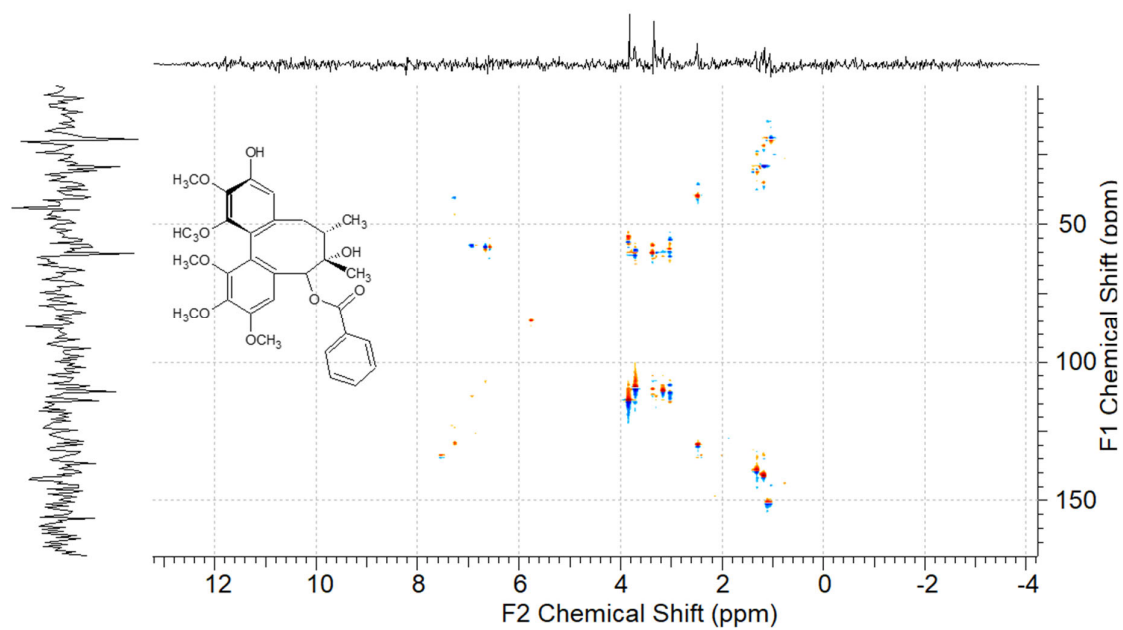

Figure S77. HSQC NMR spectrum of (-)-schisantherin E in DMSO-*d*<sub>6</sub>

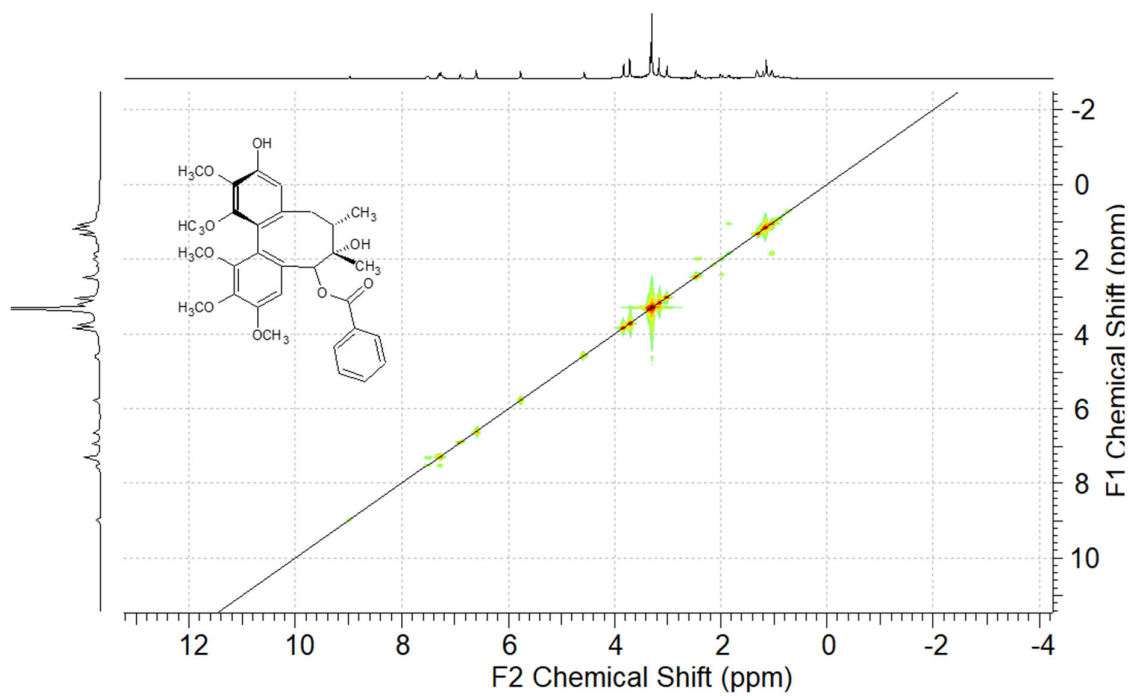

Figure S78. COSY NMR spectrum of (-)-schisantherin E in DMSO-*d*<sub>6</sub>

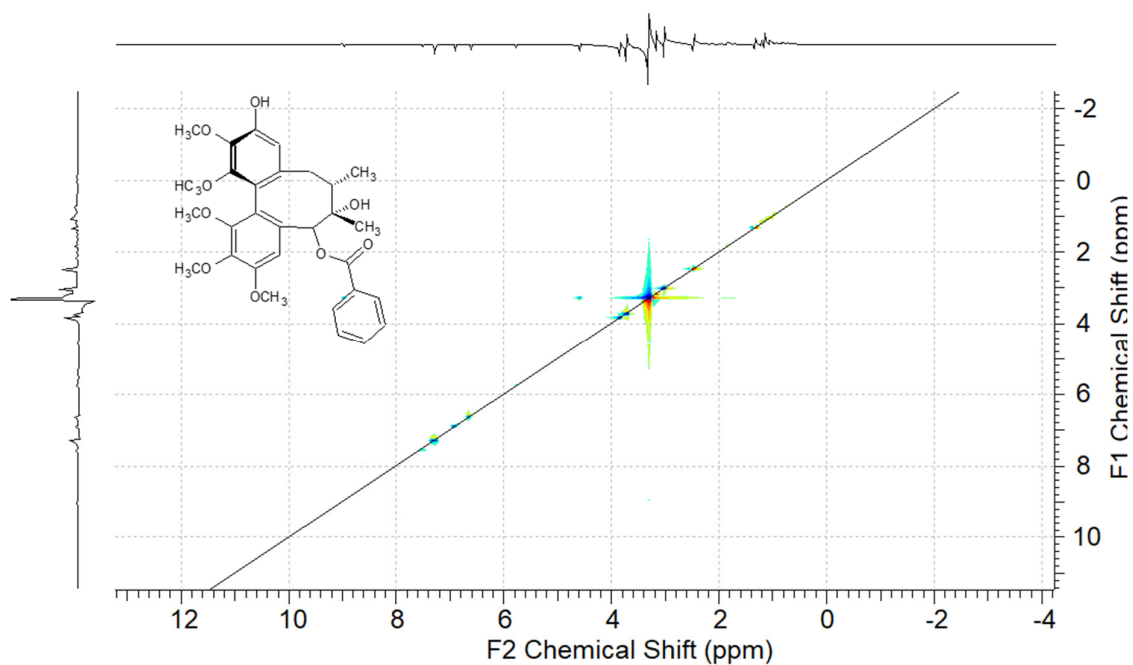

Figure S79. NOESY NMR spectrum of (-)-schisantherin E in DMSO- $d_6$

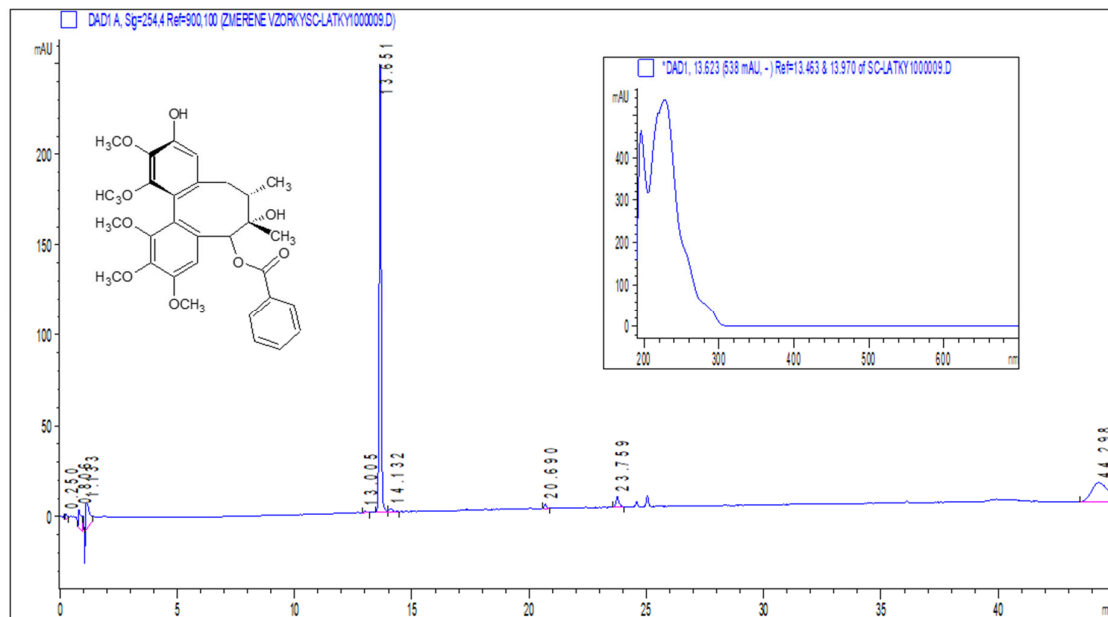

Figure S80. HPLC-DAD chromatogram of (-)-schisantherin E

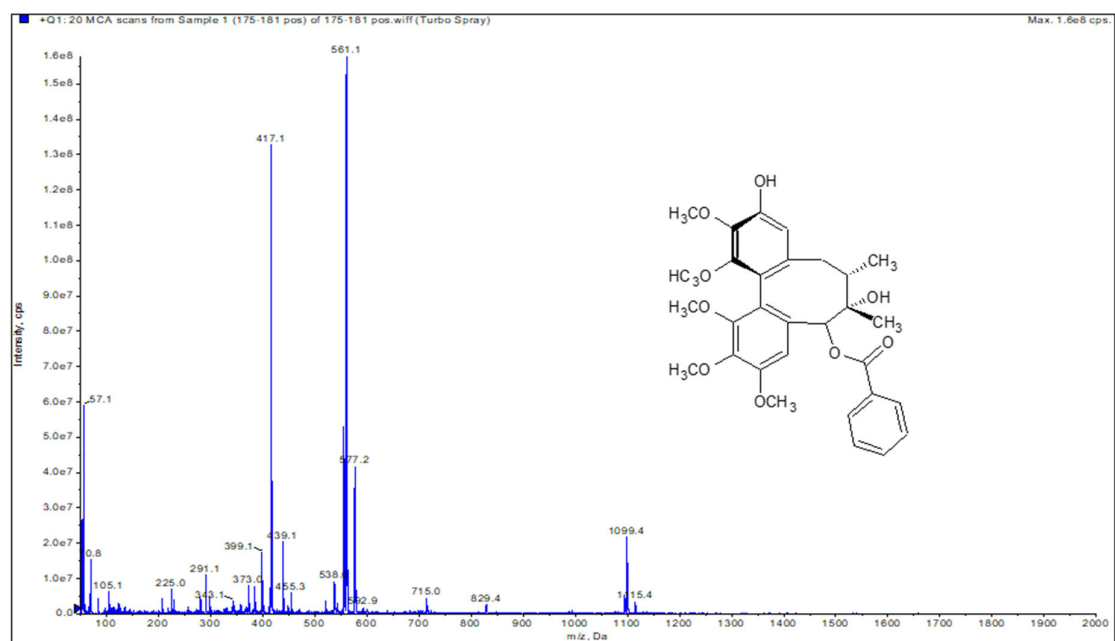

Figure S81. LR-MS spectrum of (-)-schisantherin E

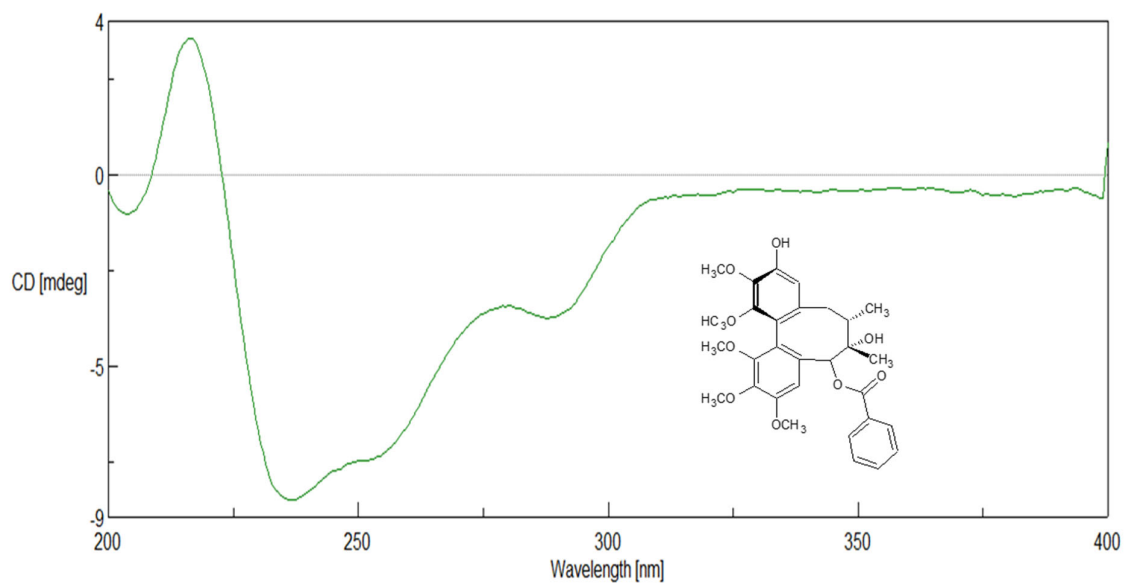

Figure S82. CD spectrum of (-)-schisantherin E in methanol (c=1 mg/mL)

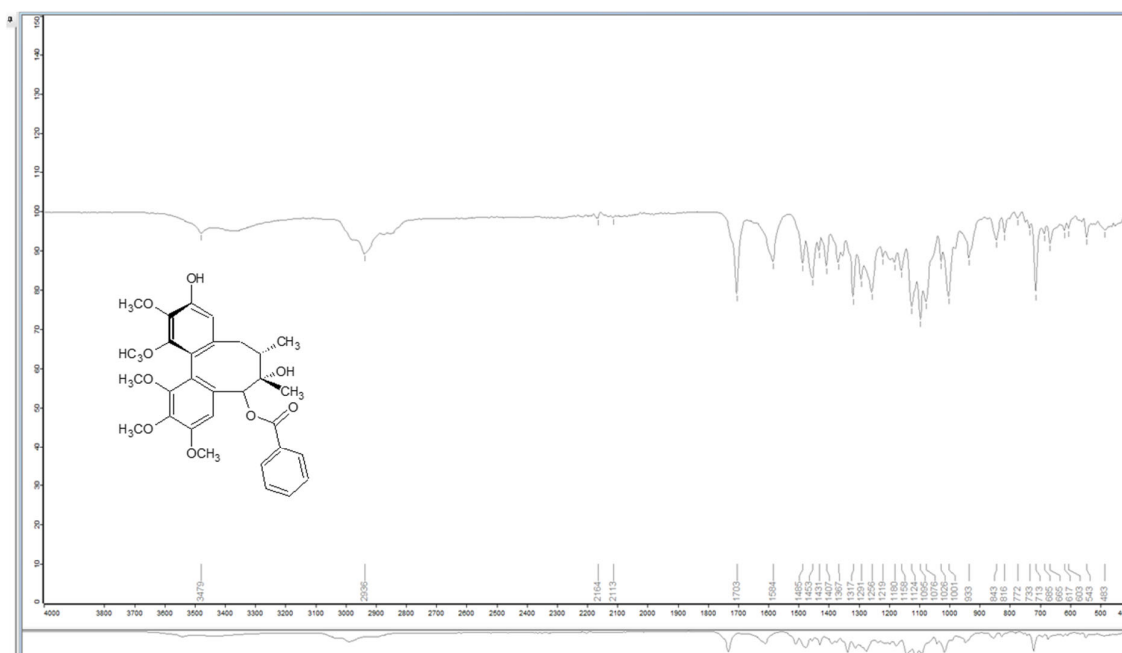

Figure S83. IR spectrum of (-)-schisantherin E

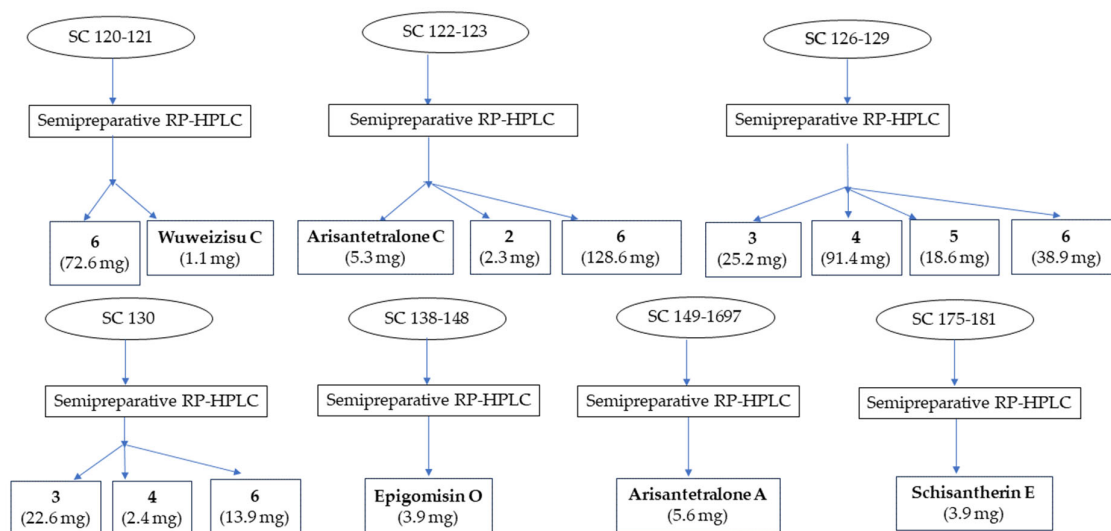

Figure S84. Schema of isolation and total yields of compounds 2–6, (-)-wuweizisu C, arisantetralone A, arisantetralone C, epigomisin O, and (-)-schisantherin E



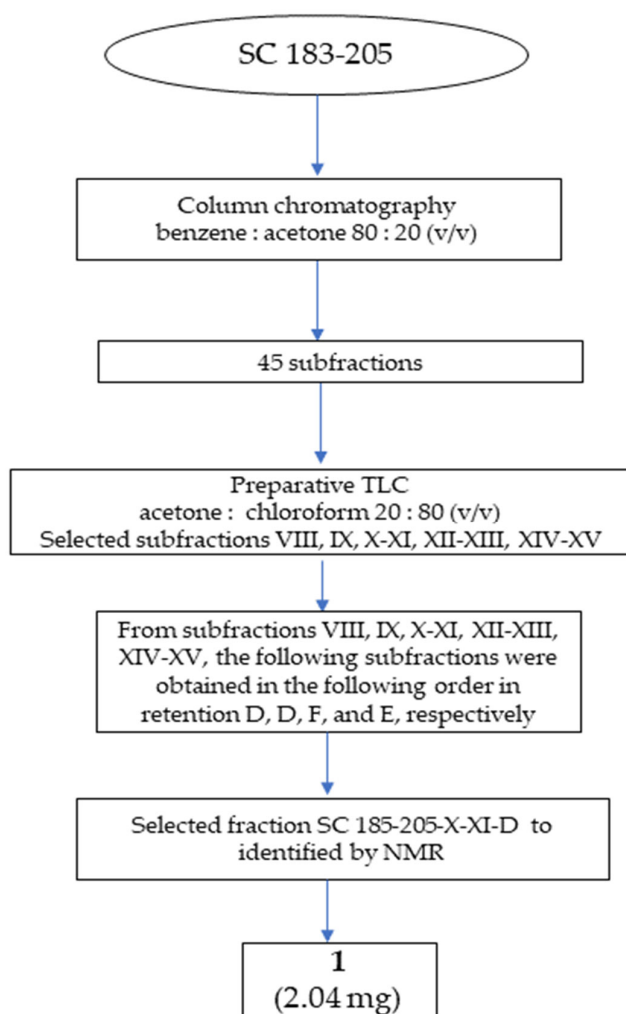

Figure S85. Schema of isolation and yield of compound 1

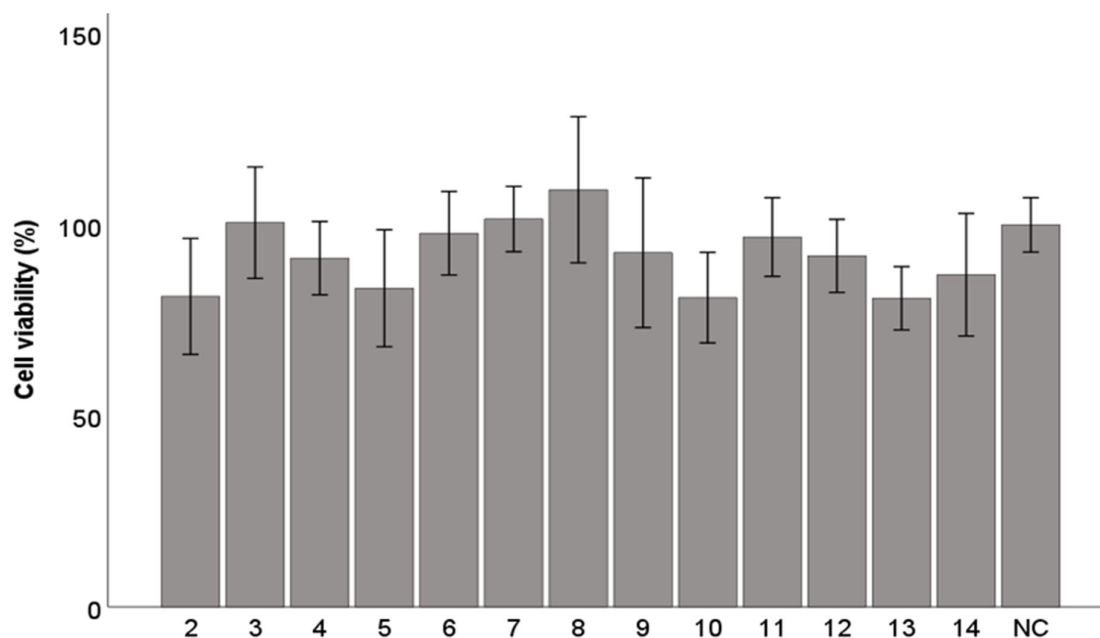

Figure S86. Antiproliferative activity of lignans **2–14**, expressed as % of cell viability. The concentration of tested lignans **2–14** was 10  $\mu$ M. DMSO was used as the solvent and was added as the negative control (NC). The results are expressed as the mean  $\pm$  SEM for three independent experiments measured in triplicate and are statistically compared to NC using Kruskal-Wallis test.

Table S1. Chromatographic conditions of separation of compounds **2**, **6**, and arisantetralone C from fraction SC 122-123

Stationary phase: Ascentis RP-Amide 25 cm  $\times$  10 mm; 5  $\mu$ m (Supelco, USA)

Detection: DAD detector  $\lambda$  = 220; 240; 260; 280 nm

Flow: 5 mL/min

Injection: 40  $\mu$ l

Temperature: 40  $^{\circ}$ C

HPLC Dionex Ultimate 3000 (Thermo Fischer Scientific, USA)

| Time (min) | MeOH (%) | ACN (%) | 0.2 % HCOOH (%) |
|------------|----------|---------|-----------------|
| 0          | 0        | 47      | 53              |
| 29.00      | 0        | 85      | 15              |
| 29.10      | 100      | 0       | 0               |
| 35.00      | 100      | 0       | 0               |
| 35.10      | 0        | 100     | 0               |
| 40.00      | 0        | 100     | 0               |
| 40.10      | 0        | 47      | 53              |
| 45.00      | 0        | 47      | 53              |

Table S2. Chromatographic conditions of separation of compounds **3**, **4**, **5** and **6** from fraction SC 130

| Stationary phase: Ascentis RP-Amide 25 cm × 10 mm; 5 μm (Supelco, USA) |          |         |                 |
|------------------------------------------------------------------------|----------|---------|-----------------|
| Detection: DAD detector λ = 240; 260; 280 nm                           |          |         |                 |
| Flow: 5 mL/min                                                         |          |         |                 |
| Injection: 15 μL                                                       |          |         |                 |
| Temperature: 40 °C                                                     |          |         |                 |
| YL9100 (Young-Lin Instruments, South Korea)                            |          |         |                 |
| Time (min)                                                             | MeOH (%) | ACN (%) | 0.2 % HCOOH (%) |
| 0                                                                      | 0        | 50      | 50              |
| 30.00                                                                  | 0        | 80      | 20              |
| 30.01                                                                  | 0        | 100     | 0               |
| 35.00                                                                  | 0        | 100     | 0               |
| 35.01                                                                  | 100      | 0       | 0               |
| 40.00                                                                  | 100      | 0       | 0               |
| 40.01                                                                  | 0        | 50      | 50              |
| 45.00                                                                  | 0        | 50      | 50              |

Table S3. Chromatographic conditions of purification of compound **3** from fraction SC 130

| Stationary phase: Ascentis RP-Amide 25 cm × 10 mm; 5 μm (Supelco, USA) |          |         |                 |
|------------------------------------------------------------------------|----------|---------|-----------------|
| Detection: DAD detector λ = 240; 260; 280 nm                           |          |         |                 |
| Flow: 5 mL/min                                                         |          |         |                 |
| Injection: 30 μL                                                       |          |         |                 |
| Temperature: 40 °C                                                     |          |         |                 |
| HPLC Dionex Ultimate 3000 (Thermo Fischer Scientific, USA)             |          |         |                 |
| Time (min)                                                             | MeOH (%) | ACN (%) | 0.2 % HCOOH (%) |
| 0                                                                      | 0        | 55      | 45              |
| 18.00                                                                  | 0        | 64      | 36              |
| 18.10                                                                  | 100      | 0       | 0               |
| 23.00                                                                  | 100      | 0       | 0               |
| 23.10                                                                  | 0        | 55      | 45              |
| 28.00                                                                  | 0        | 55      | 45              |

Table S4. Chromatographic conditions of the first purification of compounds **4** and **5** from fraction SC 130

| Stationary phase: Ascentis RP-Amide 25 cm × 10 mm; 5 μm (Supelco, USA) |          |         |                 |
|------------------------------------------------------------------------|----------|---------|-----------------|
| Detection: DAD detector λ = 240; 260; 280 nm                           |          |         |                 |
| Flow: 5 mL/min                                                         |          |         |                 |
| Injection: 25 μL                                                       |          |         |                 |
| Temperature: 40 °C                                                     |          |         |                 |
| HPLC Dionex Ultimate 3000 (Thermo Fischer Scientific, USA)             |          |         |                 |
| Time (min)                                                             | MeOH (%) | ACN (%) | 0.2 % HCOOH (%) |
| 0                                                                      | 0        | 55      | 45              |
| 18.00                                                                  | 0        | 64      | 36              |
| 18.10                                                                  | 100      | 0       | 0               |
| 23.00                                                                  | 100      | 0       | 0               |
| 23.10                                                                  | 0        | 55      | 45              |
| 28.00                                                                  | 0        | 55      | 45              |

Table S5. Chromatographic conditions of the second purification of compounds **4** and **5** from fraction SC 130

| Stationary phase: Ascentis C18 25 cm × 10 mm, 5 μm (Supelco, USA) |          |         |                 |
|-------------------------------------------------------------------|----------|---------|-----------------|
| Detection: DAD detector λ = 220, 240; 260; 280 nm                 |          |         |                 |
| Flow: 5 mL/min                                                    |          |         |                 |
| Injection: 10 μL                                                  |          |         |                 |
| Temperature: 40 °C                                                |          |         |                 |
| HPLC Dionex Ultimate 3000 (Thermo Fischer Scientific, USA)        |          |         |                 |
| Time (min)                                                        | MeOH (%) | ACN (%) | 0.2 % HCOOH (%) |
| 0                                                                 | 60       | 0       | 40              |
| 18.00                                                             | 73       | 0       | 27              |
| 18.10                                                             | 0        | 100     | 0               |
| 23.00                                                             | 0        | 100     | 0               |
| 23.10                                                             | 60       | 0       | 40              |
| 28.00                                                             | 60       | 0       | 40              |

Table S6. Chromatographic conditions of separation of compound **6** and (-)-wuweizisu C from fraction SC 120-121

|                                                                        |  |  |  |
|------------------------------------------------------------------------|--|--|--|
| Stationary phase: Ascentis RP-Amide 25 cm × 10 mm; 5 μm (Supelco, USA) |  |  |  |
| Detection: DAD detector λ = 220; 240; 260; 280 nm                      |  |  |  |
| Flow: 5 mL/min                                                         |  |  |  |
| Injection: 10 μL                                                       |  |  |  |
| Temperature: 40 °C                                                     |  |  |  |
| system YL9100 (Young-Lin Instruments, South Korea)                     |  |  |  |

| Time (min) | MeOH (%) | ACN (%) | 0.2 % HCOOH (%) |
|------------|----------|---------|-----------------|
| 0          | 0        | 30      | 70              |
| 30.00      | 0        | 80      | 20              |
| 30.01      | 0        | 100     | 0               |
| 35.00      | 0        | 100     | 0               |
| 35.01      | 100      | 0       | 0               |
| 40.00      | 100      | 0       | 0               |
| 40.01      | 0        | 30      | 70              |
| 45.00      | 0        | 30      | 70              |

Table S7. Chromatographic conditions of separation of epigomisin O from fraction SC 138-148

Stationary phase: Ascentis RP-Amide 25 cm × 10 mm; 5 μm (Supelco, USA)

Detection: DAD detector λ = 220; 240; 260; 280 nm

Flow: 5 mL/min

Injection: 25 μL

Temperature: 40 °C

HPLC Dionex Ultimate 3000 (Thermo Fischer Scientific, USA)

| Time (min) | MeOH (%) | ACN (%) | 0.2 % HCOOH (%) |
|------------|----------|---------|-----------------|
| 0          | 60       | 0       | 40              |
| 20.00      | 79       | 0       | 21              |
| 20.10      | 0        | 100     | 0               |
| 28.00      | 0        | 100     | 0               |
| 28.10      | 100      | 0       | 0               |
| 36.00      | 100      | 0       | 0               |
| 36.10      | 60       | 0       | 40              |
| 45.00      | 60       | 0       | 40              |

Table S8. Chromatographic conditions of separation of arisantetralone A from fraction SC 149-167

Stationary phase: Ascentis RP-Amide 25 cm × 10 mm; 5 μm (Supelco, USA)

Detection: DAD detector λ = 240; 260; 280 nm

Flow: 5 mL/min

Injection: 10 μL

Temperature: 40 °C

system YL9100 (Young-Lin Instruments, South Korea)

| Time (min) | MeOH (%) | ACN (%) | 0.2 % HCOOH (%) |
|------------|----------|---------|-----------------|
| 0          | 0        | 40      | 60              |
| 20.00      | 0        | 60      | 40              |
| 20.01      | 0        | 100     | 0               |
| 25.00      | 0        | 100     | 0               |

|       |     |    |    |
|-------|-----|----|----|
| 25.01 | 100 | 0  | 0  |
| 30.00 | 100 | 0  | 0  |
| 30.01 | 0   | 40 | 60 |
| 45.00 | 0   | 40 | 60 |

Table S9. Chromatographic conditions of separation of (-)- schisantherin E from fraction SC 175-181

Stationary phase: Ascentis RP-Amide 25 cm × 10 mm; 5 μm (Supelco, USA)

Detection: DAD detector λ = 240; 260; 280 nm

Flow: 5 mL/min

Injection: 20 μL

Temperature: 40 °C

system YL9100 (Young-Lin Instruments, South Korea)

| Time (min) | MeOH (%) | ACN (%) | 0.2 % HCOOH (%) |
|------------|----------|---------|-----------------|
| 0          | 0        | 30      | 70              |
| 30.00      | 0        | 90      | 10              |
| 30.01      | 0        | 100     | 0               |
| 35.00      | 0        | 100     | 0               |
| 35.01      | 100      | 0       | 0               |
| 40.00      | 100      | 0       | 0               |
| 40.01      | 0        | 30      | 70              |
| 45.00      | 0        | 30      | 70              |

Table S10. Chromatographic conditions of separation of compounds **3**, **4**, **5**, and **6** from fraction SC 126-129

Stationary phase: Ascentis RP-Amide 25 cm × 10 mm; 5 μm (Supelco, USA)

Detection: DAD detector λ = 220, 240; 260; 280 nm

Flow: 5 mL/min

Injection: 15 μL

Temperature: 40 °C

HPLC Dionex Ultimate 3000 (Thermo Fischer Scientific, USA)

| Time (min) | MeOH (%) | ACN (%) | 0.2 % HCOOH (%) |
|------------|----------|---------|-----------------|
| 0          | 0        | 40      | 60              |
| 29.00      | 0        | 81      | 19              |
| 29.10      | 100      | 0       | 0               |
| 35.00      | 100      | 0       | 0               |
| 35.10      | 0        | 100     | 0               |
| 40.00      | 0        | 100     | 0               |
| 40.10      | 0        | 40      | 60              |
| 45.00      | 0        | 40      | 60              |

Table S11. Chromatographic conditions of purification of compounds **4** and **5** from fraction SC 126-129

| Stationary phase: Ascentis C18 25 cm × 10 mm, 5 μm (Supelco, USA) |          |         |                 |
|-------------------------------------------------------------------|----------|---------|-----------------|
| Detection: DAD detector λ = 220, 240; 260; 280 nm                 |          |         |                 |
| Flow: 5 mL/min                                                    |          |         |                 |
| Injection: 15 μL                                                  |          |         |                 |
| Temperature: 40 °C                                                |          |         |                 |
| HPLC Dionex Ultimate 3000 (Thermo Fischer Scientific, USA)        |          |         |                 |
| Time (min)                                                        | MeOH (%) | ACN (%) | 0.2 % HCOOH (%) |
| 0                                                                 | 70       | 0       | 30              |
| 19.00                                                             | 82.9     | 0       | 17.1            |
| 19.10                                                             | 0        | 100     | 0               |
| 24.00                                                             | 0        | 100     | 0               |
| 24.10                                                             | 70       | 0       | 30              |
| 29.00                                                             | 70       | 0       | 30              |
